# Supplementary material for: Sex-Related Differences in Gene Expression in Human Skeletal Muscle
Source: PLoS One. 2008 Jan 2;3(1):e1385. doi: 10.1371/journal.pone.0001385 (PMC2148100; doi:10.1371/journal.pone.0001385)
Supplement: Excel File S1 — Sex differences for all transcripts detected in muscle. Affymetrix probe set IDs, female/male expression ratios, P values (from ANOVA), and gene names and IDs for all transcripts detected in skeletal muscle. (3.07 MB XLS) [file pone.0001385.s001.xls]

## Sheet: annot_temp.csv.results
Probe Set	F/M	P sex	source	Gene	Symbol	Gene ID
1007_s_at	0.994689	0.944615	U133ASc1	discoidin domain receptor family, member 1	DDR1	780
1053_at	1.06124	0.343596	U133Asc2	replication factor C (activator 1) 2, 40kDa	RFC2	5982
117_at	1.10764	0.399952	U133Asc2	heat shock 70kDa protein 6 (HSP70B')	HSPA6	3310
121_at	0.856474	0.000764559	U133ASc1	paired box gene 8	PAX8	7849
1294_at	0.864251	0.00946484	U133Asc2	ubiquitin-activating enzyme E1-like	UBE1L	7318
1316_at	0.987333	0.82045	U133ASc1	thyroid hormone receptor, alpha (erythroblastic leukemia viral (v-erb-a) oncogene homolog, avian)	THRA	7067
1431_at	0.958825	0.397376	U133Asc2	cytochrome P450, family 2, subfamily E, polypeptide 1	CYP2E1	1571
1487_at	0.85435	0.0654091	U133ASc1	estrogen-related receptor alpha	ESRRA	2101
1494_f_at	0.991381	0.777066	U133Asc2	cytochrome P450, family 2, subfamily A, polypeptide 6	CYP2A6	1548
1598_g_at	1.2317	0.00403421	U133ASc1	growth arrest-specific 6	GAS6	2621
1773_at	0.871781	0.248557	U133Asc2	farnesyltransferase, CAAX box, beta	FNTB	2342
179_at	0.81523	0.00023043	U133ASc1	postmeiotic segregation increased 2-like 11	PMS2L11	441263
200000_s_at	1.08437	0.101633	U133Asc2	PRP8 pre-mRNA processing factor 8 homolog (S. cerevisiae)	PRPF8	10594
200001_at	0.992533	0.876551	U133Asc2	calpain, small subunit 1	CAPNS1	826
200002_at	0.837989	7.04152e-05	U133Bsc1	ribosomal protein L35	RPL35	11224
200003_s_at	0.875458	0.0571932	U133ASc1	ribosomal protein L28	RPL28	6158
200004_at	1.12068	0.0222307	U133ASc1	eukaryotic translation initiation factor 4 gamma, 2	EIF4G2	1982
200005_at	1.00725	0.900719	U133Asc2	eukaryotic translation initiation factor 3, subunit 7 zeta, 66/67kDa	EIF3S7	8664
200006_at	0.853228	0.00874029	U133ASc1	Parkinson disease (autosomal recessive, early onset) 7	PARK7	11315
200007_at	1.01964	0.591261	U133ASc1	signal recognition particle 14kDa (homologous Alu RNA binding protein)	SRP14	6727
200008_s_at	0.783793	0.0274745	U133Asc2	GDP dissociation inhibitor 2	GDI2	2665
200009_at	1.0835	0.0829017	U133Asc2	GDP dissociation inhibitor 2	GDI2	2665
200010_at	0.791162	3.36215e-05	U133ASc1	ribosomal protein L11	RPL11	6135
200011_s_at	0.929808	0.648675	U133Asc2	ADP-ribosylation factor 3	ARF3	377
200012_x_at	1.01794	0.604985	U133Bsc1	ribosomal protein L21	RPL21	6144
200013_at	0.913288	0.0123997	U133ASc1	ribosomal protein L24	RPL24	6152
200014_s_at	0.996591	0.947985	U133Asc2	heterogeneous nuclear ribonucleoprotein C (C1/C2)	HNRPC	3183
200015_s_at	0.937857	0.405869	U133Asc2	septin 2	SEP2	4735
200016_x_at	1.03045	0.648438	U133ASc1	heterogeneous nuclear ribonucleoprotein A1	HNRPA1	3178
200017_at	1.14666	0.0790506	U133ASc1	ribosomal protein S27a	RPS27A	6233
200018_at	1.0044	0.896585	U133Bsc1	ribosomal protein S13	RPS13	6207
200019_s_at	0.830562	0.00268164	U133ASc1	Finkel-Biskis-Reilly murine sarcoma virus (FBR-MuSV) ubiquitously expressed (fox derived); ribosomal protein S30	FAU	2197
200020_at	1.27512	0.000445453	U133Asc2	TAR DNA binding protein	TARDBP	23435
200021_at	1.02203	0.710636	U133ASc1	cofilin 1 (non-muscle)	CFL1	1072
200022_at	0.886724	0.0866907	U133ASc1	ribosomal protein L18	RPL18	6141
200023_s_at	0.888307	0.0334538	U133ASc1	eukaryotic translation initiation factor 3, subunit 5 epsilon, 47kDa	EIF3S5	8665
200024_at	0.769915	5.60758e-07	U133ASc1	ribosomal protein S5	RPS5	6193
200025_s_at	1.01457	0.748884	U133ASc1	ribosomal protein L27	RPL27	6155
200026_at	1.06514	0.132827	U133Bsc1	ribosomal protein L34	RPL34	6164
200027_at	0.816418	0.0160304	U133Asc2	asparaginyl-tRNA synthetase	NARS	4677
200028_s_at	1.08574	0.212073	U133ASc1	START domain containing 7	STARD7	56910
200029_at	1.07977	0.0501761	U133ASc1	ribosomal protein L19	RPL19	6143
200030_s_at	0.990025	0.783969	U133ASc1	solute carrier family 25 (mitochondrial carrier; phosphate carrier), member 3	SLC25A3	5250
200033_at	0.954111	0.589842	U133ASc1	DEAD (Asp-Glu-Ala-Asp) box polypeptide 5	DDX5	1655
200034_s_at	1.01381	0.727148	U133ASc1	ribosomal protein L6	RPL6	6128
200035_at	1.27847	0.000437785	U133ASc1	dullard homolog (Xenopus laevis)	DULLARD	23399
200036_s_at	0.816784	5.07198e-05	U133ASc1	ribosomal protein L10a	RPL10A	4736
200037_s_at	1.16424	0.00764716	U133Asc2	chromobox homolog 3 (HP1 gamma homolog, Drosophila)	CBX3	11335
200038_s_at	0.904483	0.0275109	U133ASc1	ribosomal protein L17	RPL17	6139
200039_s_at	1.03257	0.304733	U133Asc2	proteasome (prosome, macropain) subunit, beta type, 2	PSMB2	5690
200040_at	1.22022	0.0116919	U133Asc2	KH domain containing, RNA binding, signal transduction associated 1	KHDRBS1	10657
200041_s_at	1.22135	0.000844503	U133Asc2	HLA-B associated transcript 1	BAT1	7919
200042_at	0.964847	0.434953	U133Asc2	chromosome 22 open reading frame 28	C22orf28	51493
200043_at	0.870264	0.00637545	U133Asc2	enhancer of rudimentary homolog (Drosophila)	ERH	2079
200044_at	0.915032	0.0514287	U133Asc2	splicing factor, arginine/serine-rich 9	SFRS9	8683
200045_at	0.933199	0.160314	U133Asc2	ATP-binding cassette, sub-family F (GCN20), member 1	ABCF1	23
200046_at	0.656243	5.38419e-07	U133Asc2	defender against cell death 1	DAD1	1603
200047_s_at	0.970744	0.636228	U133Asc2	YY1 transcription factor	YY1	7528
200048_s_at	0.952193	0.512634	U133Asc2	jumping translocation breakpoint	JTB	10899
200049_at	0.91877	0.168683	U133ASc1	MYST histone acetyltransferase 2	MYST2	11143
200050_at	0.96376	0.607433	U133Asc2	zinc finger protein 146	ZNF146	7705
200051_at	0.732871	0.00160186	U133Asc2	squamous cell carcinoma antigen recognized by T cells	SART1	9092
200052_s_at	0.860501	0.0139986	U133Asc2	interleukin enhancer binding factor 2, 45kDa	ILF2	3608
200053_at	0.927945	0.220648	U133ASc1	sperm associated antigen 7	SPAG7	9552
200054_at	0.949945	0.134481	U133Asc2	zinc finger protein 259	ZNF259	8882
200055_at	0.884232	0.0325105	U133Asc2	TAF10 RNA polymerase II, TATA box binding protein (TBP)-associated factor, 30kDa	TAF10	6881
200056_s_at	1.13879	0.205152	U133Asc2	nuclear DNA-binding protein	C1D	10438
200057_s_at	1.1405	7.11426e-05	U133Asc2	non-POU domain containing, octamer-binding	NONO	4841
200058_s_at	1.16134	0.0230568	U133Asc2	activating signal cointegrator 1 complex subunit 3-like 1	ASCC3L1	23020
200059_s_at	0.742799	9.11047e-05	U133ASc1	ras homolog gene family, member A	RHOA	387
200060_s_at	1.07012	0.199265	U133Asc2	RNA binding protein S1, serine-rich domain	RNPS1	10921
200061_s_at	1.04741	0.124143	U133Bsc1	ribosomal protein S24	RPS24	6229
200062_s_at	0.965959	0.17338	U133Bsc1	ribosomal protein L30	RPL30	6156
200063_s_at	0.938517	0.24714	U133ASc1	nucleophosmin (nucleolar phosphoprotein B23, numatrin)	NPM1	4869
200064_at	1.04706	0.341928	U133ASc1	heat shock protein 90kDa alpha (cytosolic), class B member 1	HSP90AB1	3326
200065_s_at	0.77899	2.58729e-05	U133Asc2	ADP-ribosylation factor 1	ARF1	375
200066_at	0.930089	0.140063	U133Asc2	IK cytokine, down-regulator of HLA II	IK	3550
200067_x_at	0.979425	0.657787	U133Asc2	sorting nexin 3	SNX3	8724
200068_s_at	0.89773	0.0621418	U133Asc2	calnexin	CANX	821
200069_at	1.18101	0.216079	U133Asc2	squamous cell carcinoma antigen recognized by T cells 3	SART3	9733
200070_at	1.06389	0.513302	U133Asc2	chromosome 2 open reading frame 24	C2orf24	27013
200071_at	1.15828	0.174867	U133Asc2	survival motor neuron domain containing 1	SMNDC1	10285
200072_s_at	1.02149	0.743073	U133Asc2	heterogeneous nuclear ribonucleoprotein M	HNRPM	4670
200073_s_at	0.93424	0.194323	U133Asc2	heterogeneous nuclear ribonucleoprotein D (AU-rich element RNA binding protein 1, 37kDa)	HNRPD	3184
200074_s_at	0.980636	0.73784	U133ASc1	ribosomal protein L14	RPL14	9045
200075_s_at	0.84122	0.00896764	U133Asc2	guanylate kinase 1	GUK1	2987
200076_s_at	0.958529	0.352819	U133Asc2	chromosome 19 open reading frame 50	C19orf50	79036
200077_s_at	0.978522	0.665745	U133ASc1	ornithine decarboxylase antizyme 1	OAZ1	4946
200078_s_at	0.775203	5.91635e-05	U133Asc2	ATPase, H+ transporting, lysosomal 21kDa, V0 subunit b	ATP6V0B	533
200079_s_at	1.03651	0.474601	U133ASc1	lysyl-tRNA synthetase	KARS	3735
200080_s_at	1.00544	0.92138	U133ASc1	H3 histone, family 3A	H3F3A	3020
200081_s_at	0.820514	0.0010739	U133ASc1	Ribosomal protein S6	RPS6	6194
200082_s_at	0.939345	0.144291	U133ASc1	Ribosomal protein S7	RPS7	6201
200083_at	1.14239	0.0752399	U133Asc2	ubiquitin specific peptidase 22	USP22	23326
200084_at	0.879471	0.0432457	U133Asc2	Chromosome 11 open reading frame 58	C11orf58	10944
200085_s_at	0.928001	0.2051	U133Asc2	transcription elongation factor B (SIII), polypeptide 2 (18kDa, elongin B)	TCEB2	6923
200086_s_at	1.00153	0.976271	U133ASc1	Cytochrome c oxidase subunit IV isoform 1	COX4I1	1327
200087_s_at	0.870145	0.00591103	U133Asc2	transmembrane emp24 domain trafficking protein 2	TMED2	10959
200088_x_at	0.977074	0.693339	U133ASc1	Ribosomal protein L12	RPL12	6136
200089_s_at	1.0208	0.614845	U133ASc1	Ribosomal protein L4	RPL4	6124
200090_at	0.941653	0.216627	U133Asc2	Farnesyltransferase, CAAX box, alpha	FNTA	2339
200091_s_at	0.975361	0.668187	U133ASc1	Ribosomal protein S25	RPS25	6230
200092_s_at	0.927309	0.164722	U133ASc1	Ribosomal protein L37	RPL37	6167
200093_s_at	1.00755	0.927166	U133Asc2	Histidine triad nucleotide binding protein 1	HINT1	3094
200094_s_at	0.889485	0.0788099	U133ASc1	Eukaryotic translation elongation factor 2	EEF2	1938
200095_x_at	0.998237	0.965973	U133Bsc1	CDNA: FLJ21700 fis, clone COL09849, highly similar to HSU14972 Human ribosomal protein S10 mRNA	---	0
200096_s_at	0.885526	0.127702	U133Asc2	ATPase, H+ transporting, lysosomal 9kDa, V0 subunit e1	ATP6V0E1	8992
200097_s_at	1.12397	0.0782589	U133Asc2	heterogeneous nuclear ribonucleoprotein K	HNRPK	3190
200098_s_at	1.00146	0.976809	U133Asc2	anaphase promoting complex subunit 5	ANAPC5	51433
200099_s_at	1.07597	0.308974	U133ASc1	---	---	---
200593_s_at	0.678155	0.000130762	U133Asc2	heterogeneous nuclear ribonucleoprotein U (scaffold attachment factor A)	HNRPU	3192
200594_x_at	1.03093	0.566525	U133Asc2	heterogeneous nuclear ribonucleoprotein U (scaffold attachment factor A)	HNRPU	3192
200595_s_at	1.15264	0.0398083	U133Asc2	eukaryotic translation initiation factor 3, subunit 10 theta, 150/170kDa	EIF3S10	8661
200596_s_at	1.1743	0.0277562	U133Asc2	eukaryotic translation initiation factor 3, subunit 10 theta, 150/170kDa	EIF3S10	8661
200597_at	1.00929	0.873138	U133Asc2	eukaryotic translation initiation factor 3, subunit 10 theta, 150/170kDa	EIF3S10	8661
200598_s_at	0.81541	0.19527	U133Asc2	heat shock protein 90kDa beta (Grp94), member 1	HSP90B1	7184
200599_s_at	0.973682	0.745718	U133Asc2	heat shock protein 90kDa beta (Grp94), member 1	HSP90B1	7184
200600_at	1.05	0.71292	U133Asc2	moesin	MSN	4478
200601_at	1.24499	0.0108308	U133Asc2	actinin, alpha 4	ACTN4	81
200602_at	1.08955	0.578874	U133Asc2	amyloid beta (A4) precursor protein (peptidase nexin-II, Alzheimer disease)	APP	351
200603_at	1.01299	0.887508	U133ASc1	protein kinase, cAMP-dependent, regulatory, type I, alpha (tissue specific extinguisher 1)	PRKAR1A	5573
200604_s_at	0.53931	0.00222837	U133Asc2	protein kinase, cAMP-dependent, regulatory, type I, alpha (tissue specific extinguisher 1)	PRKAR1A	5573
200605_s_at	0.85114	0.172833	U133Asc2	protein kinase, cAMP-dependent, regulatory, type I, alpha (tissue specific extinguisher 1)	PRKAR1A	5573
200606_at	1.96202	0.332974	U133Asc2	desmoplakin	DSP	1832
200607_s_at	0.983944	0.90202	U133ASc1	RAD21 homolog (S. pombe)	RAD21	5885
200608_s_at	1.10736	0.284598	U133Asc2	RAD21 homolog (S. pombe)	RAD21	5885
200609_s_at	0.875009	0.0235311	U133Asc2	WD repeat domain 1	WDR1	9948
200610_s_at	0.883392	0.0800239	U133ASc1	nucleolin	NCL	4691
200611_s_at	0.922294	0.040992	U133Asc2	WD repeat domain 1	WDR1	9948
200613_at	1.09062	0.352341	U133Asc2	adaptor-related protein complex 2, mu 1 subunit	AP2M1	1173
200614_at	0.984434	0.766593	U133Asc2	clathrin, heavy chain (Hc)	CLTC	1213
200615_s_at	0.844996	0.209822	U133Asc2	adaptor-related protein complex 2, beta 1 subunit	AP2B1	163
200617_at	0.963367	0.684985	U133Asc2	KIAA0152	KIAA0152	9761
200618_at	1.15221	0.156416	U133Asc2	LIM and SH3 protein 1	LASP1	3927
200620_at	0.952082	0.264401	U133Asc2	transmembrane protein 59	TMEM59	9528
200621_at	0.776663	0.065541	U133Asc2	cysteine and glycine-rich protein 1	CSRP1	1465
200622_x_at	0.945128	0.179566	U133Asc2	calmodulin 3 (phosphorylase kinase, delta)	CALM3	808
200623_s_at	2.28166	1.06465e-07	U133Asc2	calmodulin 3 (phosphorylase kinase, delta)	CALM3	808
200624_s_at	0.972644	0.645782	U133Asc2	matrin 3	MATR3	9782
200625_s_at	1.30166	0.0442278	U133Asc2	CAP, adenylate cyclase-associated protein 1 (yeast)	CAP1	10487
200626_s_at	0.842439	0.167858	U133Asc2	matrin 3	MATR3	9782
200627_at	0.893497	0.0898438	U133Asc2	prostaglandin E synthase 3 (cytosolic)	PTGES3	10728
200629_at	0.965772	0.792543	U133Asc2	tryptophanyl-tRNA synthetase	WARS	7453
200630_x_at	1.3394	0.000982156	U133ASc1	SET translocation (myeloid leukemia-associated)	SET	6418
200631_s_at	1.05236	0.294308	U133Asc2	SET translocation (myeloid leukemia-associated)	SET	6418
200632_s_at	0.873986	0.187445	U133Asc2	N-myc downstream regulated gene 1	NDRG1	10397
200634_at	0.866051	0.12586	U133Asc2	profilin 1	PFN1	5216
200638_s_at	0.582629	0.000295116	U133Asc2	tyrosine 3-monooxygenase/tryptophan 5-monooxygenase activation protein, zeta polypeptide	YWHAZ	7534
200639_s_at	0.707191	0.000179716	U133Asc2	tyrosine 3-monooxygenase/tryptophan 5-monooxygenase activation protein, zeta polypeptide	YWHAZ	7534
200640_at	0.735658	1.04038e-07	U133Asc2	tyrosine 3-monooxygenase/tryptophan 5-monooxygenase activation protein, zeta polypeptide	YWHAZ	7534
200641_s_at	0.664898	0.0248288	U133Asc2	tyrosine 3-monooxygenase/tryptophan 5-monooxygenase activation protein, zeta polypeptide	YWHAZ	7534
200642_at	0.979315	0.695457	U133ASc1	superoxide dismutase 1, soluble (amyotrophic lateral sclerosis 1 (adult))	SOD1	6647
200643_at	0.947043	0.403755	U133Asc2	high density lipoprotein binding protein (vigilin)	HDLBP	3069
200644_at	0.986201	0.904251	U133Asc2	MARCKS-like 1	MARCKSL1	65108
200645_at	0.996647	0.959541	U133ASc1	GABA(A) receptor-associated protein	GABARAP	11337
200646_s_at	0.867774	0.233374	U133Asc2	nucleobindin 1	NUCB1	4924
200647_x_at	1.09597	0.374288	U133ASc1	eukaryotic translation initiation factor 3, subunit 8, 110kDa /// similar to eukaryotic translation initiation factor 3, subunit 8, 110kDa	EIF3S8 /// LOC728689	728689 /// 8663
200648_s_at	0.666691	0.0675196	U133Asc2	glutamate-ammonia ligase (glutamine synthetase)	GLUL	2752
200649_at	0.922463	0.4725	U133Asc2	nucleobindin 1	NUCB1	4924
200651_at	0.875377	0.152771	U133ASc1	guanine nucleotide binding protein (G protein), beta polypeptide 2-like 1	GNB2L1	10399
200652_at	0.880869	0.0191787	U133Asc2	signal sequence receptor, beta (translocon-associated protein beta)	SSR2	6746
200653_s_at	1.29557	0.0237788	U133ASc1	calmodulin 1 (phosphorylase kinase, delta)	CALM1	801
200654_at	1.01804	0.625922	U133Asc2	procollagen-proline, 2-oxoglutarate 4-dioxygenase (proline 4-hydroxylase), beta polypeptide	P4HB	5034
200655_s_at	0.83315	0.0771261	U133ASc1	calmodulin 1 (phosphorylase kinase, delta)	CALM1	801
200656_s_at	0.790652	0.0372901	U133Asc2	procollagen-proline, 2-oxoglutarate 4-dioxygenase (proline 4-hydroxylase), beta polypeptide	P4HB	5034
200657_at	0.925829	0.47134	U133Asc2	solute carrier family 25 (mitochondrial carrier; adenine nucleotide translocator), member 5	SLC25A5	292
200658_s_at	0.903864	0.245111	U133Asc2	prohibitin	PHB	5245
200659_s_at	1.00554	0.926515	U133Asc2	prohibitin	PHB	5245
200662_s_at	0.926517	0.198723	U133Asc2	translocase of outer mitochondrial membrane 20 homolog (yeast)	TOMM20	9804
200663_at	0.872877	0.0246819	U133ASc1	CD63 molecule	CD63	967
200664_s_at	0.843565	0.210198	U133Asc2	DnaJ (Hsp40) homolog, subfamily B, member 1	DNAJB1	3337
200665_s_at	1.16723	0.412542	U133ASc1	secreted protein, acidic, cysteine-rich (osteonectin)	SPARC	6678
200666_s_at	1.11908	0.234047	U133Asc2	DnaJ (Hsp40) homolog, subfamily B, member 1	DNAJB1	3337
200667_at	0.898211	0.0250296	U133Asc2	ubiquitin-conjugating enzyme E2D 3 (UBC4/5 homolog, yeast)	UBE2D3	7323
200668_s_at	0.877179	0.035591	U133Asc2	ubiquitin-conjugating enzyme E2D 3 (UBC4/5 homolog, yeast)	UBE2D3	7323
200669_s_at	0.76104	0.00425195	U133Asc2	ubiquitin-conjugating enzyme E2D 3 (UBC4/5 homolog, yeast)	UBE2D3	7323
200670_at	0.892705	0.0228999	U133Asc2	X-box binding protein 1	XBP1	7494
200673_at	0.896592	0.145672	U133ASc1	lysosomal-associated protein transmembrane 4 alpha	LAPTM4A	9741
200675_at	1.28699	0.0171436	U133Asc2	CD81 molecule	CD81	975
200676_s_at	1.08634	0.58162	U133Asc2	ubiquitin-conjugating enzyme E2L 3	UBE2L3	7332
200677_at	1.00439	0.950515	U133Asc2	pituitary tumor-transforming 1 interacting protein	PTTG1IP	754
200678_x_at	0.949101	0.158617	U133Asc2	granulin	GRN	2896
200679_x_at	0.963562	0.578425	U133Asc2	high-mobility group box 1	HMGB1	3146
200680_x_at	1.06953	0.10915	U133ASc1	high-mobility group box 1	HMGB1	3146
200681_at	1.10663	0.0201723	U133ASc1	glyoxalase I	GLO1	2739
200682_s_at	0.854458	0.014129	U133Asc2	ubiquitin-conjugating enzyme E2L 3	UBE2L3	7332
200683_s_at	0.889442	0.179516	U133Asc2	ubiquitin-conjugating enzyme E2L 3	UBE2L3	7332
200684_s_at	1.15503	0.219146	U133Asc2	ubiquitin-conjugating enzyme E2L 3	UBE2L3	7332
200685_at	0.904967	0.429808	U133Asc2	splicing factor, arginine/serine-rich 11	SFRS11	9295
200686_s_at	1.10831	0.462345	U133Asc2	splicing factor, arginine/serine-rich 11	SFRS11	9295
200690_at	1.09784	0.199735	U133Asc2	heat shock 70kDa protein 9 (mortalin)	HSPA9	3313
200691_s_at	0.814329	0.00688119	U133Asc2	heat shock 70kDa protein 9 (mortalin)	HSPA9	3313
200692_s_at	0.80765	0.0111586	U133Asc2	heat shock 70kDa protein 9 (mortalin)	HSPA9	3313
200693_at	0.909469	0.328141	U133Asc2	tyrosine 3-monooxygenase/tryptophan 5-monooxygenase activation protein, theta polypeptide	YWHAQ	10971
200694_s_at	1.06367	0.128991	U133Asc2	DEAD (Asp-Glu-Ala-Asp) box polypeptide 24	DDX24	57062
200695_at	0.924757	0.13419	U133Asc2	protein phosphatase 2 (formerly 2A), regulatory subunit A , alpha isoform	PPP2R1A	5518
200696_s_at	0.918771	0.444185	U133ASc1	gelsolin (amyloidosis, Finnish type)	GSN	2934
200697_at	0.879512	0.0701494	U133Asc2	hexokinase 1	HK1	3098
200698_at	0.576817	6.52507e-05	U133Asc2	KDEL (Lys-Asp-Glu-Leu) endoplasmic reticulum protein retention receptor 2	KDELR2	11014
200699_at	1.04556	0.520389	U133Asc2	Full-length cDNA clone CS0DC014YA20 of Neuroblastoma Cot 25-normalized of Homo sapiens (human)	---	0
200700_s_at	0.791501	0.00741769	U133Asc2	KDEL (Lys-Asp-Glu-Leu) endoplasmic reticulum protein retention receptor 2	KDELR2	11014
200701_at	0.764179	0.000512033	U133Asc2	Niemann-Pick disease, type C2	NPC2	10577
200703_at	0.89385	0.389556	U133Asc2	dynein, light chain, LC8-type 1	DYNLL1	8655
200704_at	1.1908	0.198073	U133Asc2	lipopolysaccharide-induced TNF factor	LITAF	9516
200705_s_at	1.11266	0.0760931	U133ASc1	eukaryotic translation elongation factor 1 beta 2	EEF1B2	1933
200708_at	0.956037	0.524203	U133ASc1	glutamic-oxaloacetic transaminase 2, mitochondrial (aspartate aminotransferase 2)	GOT2	2806
200709_at	1.26241	0.00620213	U133Asc2	FK506 binding protein 1A, 12kDa	FKBP1A	2280
200710_at	0.935072	0.461801	U133ASc1	acyl-Coenzyme A dehydrogenase, very long chain	ACADVL	37
200711_s_at	0.943001	0.193344	U133Asc2	S-phase kinase-associated protein 1A (p19A)	SKP1A	6500
200712_s_at	0.690255	0.0631273	U133Asc2	microtubule-associated protein, RP/EB family, member 1	MAPRE1	22919
200713_s_at	1.01059	0.800938	U133Asc2	microtubule-associated protein, RP/EB family, member 1	MAPRE1	22919
200714_x_at	1.02026	0.726464	U133Asc2	amplified in osteosarcoma	OS9	10956
200715_x_at	0.967164	0.577968	U133ASc1	ribosomal protein L13a	RPL13A	23521
200718_s_at	1.05906	0.139305	U133ASc1	S-phase kinase-associated protein 1A (p19A)	SKP1A	6500
200719_at	0.929411	0.391985	U133Asc2	S-phase kinase-associated protein 1A (p19A)	SKP1A	6500
200720_s_at	0.858188	0.0593204	U133Asc2	ARP1 actin-related protein 1 homolog A, centractin alpha (yeast)	ACTR1A	10121
200721_s_at	0.939584	0.464259	U133Asc2	ARP1 actin-related protein 1 homolog A, centractin alpha (yeast)	ACTR1A	10121
200722_s_at	0.872105	0.0896057	U133Asc2	cell cycle associated protein 1	CAPRIN1	4076
200723_s_at	0.980657	0.810452	U133Asc2	cell cycle associated protein 1	CAPRIN1	4076
200726_at	0.788132	0.000284601	U133Asc2	protein phosphatase 1, catalytic subunit, gamma isoform	PPP1CC	5501
200728_at	0.845918	0.104157	U133Asc2	ARP2 actin-related protein 2 homolog (yeast)	ACTR2	10097
200729_s_at	0.599185	0.000848223	U133Asc2	ARP2 actin-related protein 2 homolog (yeast)	ACTR2	10097
200730_s_at	0.940446	0.744123	U133Asc2	protein tyrosine phosphatase type IVA, member 1	PTP4A1	7803
200731_s_at	0.795834	0.0215514	U133Asc2	protein tyrosine phosphatase type IVA, member 1	PTP4A1	7803
200732_s_at	0.966263	0.503627	U133ASc1	protein tyrosine phosphatase type IVA, member 1	PTP4A1	7803
200733_s_at	0.937336	0.513026	U133Asc2	protein tyrosine phosphatase type IVA, member 1	PTP4A1	7803
200734_s_at	0.916106	0.285514	U133Asc2	ADP-ribosylation factor 3	ARF3	377
200735_x_at	1.17234	0.0119036	U133ASc1	nascent polypeptide-associated complex alpha subunit	NACA	4666
200736_s_at	0.71221	0.000217067	U133Asc2	glutathione peroxidase 1	GPX1	2876
200737_at	0.705466	0.000778275	U133Asc2	phosphoglycerate kinase 1	PGK1	5230
200738_s_at	0.810701	0.00526042	U133ASc1	phosphoglycerate kinase 1	PGK1	5230
200739_s_at	1.03934	0.736189	U133Asc2	SMT3 suppressor of mif two 3 homolog 3 (S. cerevisiae)	SUMO3	6612
200740_s_at	1.02927	0.721297	U133Asc2	SMT3 suppressor of mif two 3 homolog 3 (S. cerevisiae)	SUMO3	6612
200742_s_at	0.967084	0.764669	U133Asc2	tripeptidyl peptidase I	TPP1	1200
200743_s_at	1.22994	0.0254331	U133Asc2	tripeptidyl peptidase I	TPP1	1200
200744_s_at	0.744488	0.00676438	U133Asc2	guanine nucleotide binding protein (G protein), beta polypeptide 1	GNB1	2782
200745_s_at	1.11671	0.260923	U133Asc2	guanine nucleotide binding protein (G protein), beta polypeptide 1	GNB1	2782
200746_s_at	1.1288	0.126698	U133Asc2	guanine nucleotide binding protein (G protein), beta polypeptide 1	GNB1	2782
200747_s_at	1.17151	0.0078914	U133Asc2	nuclear mitotic apparatus protein 1	NUMA1	4926
200748_s_at	1.13487	0.0608821	U133ASc1	ferritin, heavy polypeptide 1	FTH1	2495
200749_at	0.920786	0.222103	U133Asc2	RAN, member RAS oncogene family	RAN	5901
200750_s_at	0.81665	0.000812155	U133Asc2	RAN, member RAS oncogene family	RAN	5901
200751_s_at	0.818913	0.136081	U133Asc2	heterogeneous nuclear ribonucleoprotein C (C1/C2)	HNRPC	3183
200752_s_at	0.94717	0.16338	U133Asc2	calpain 1, (mu/I) large subunit	CAPN1	823
200753_x_at	0.790868	0.037294	U133Asc2	splicing factor, arginine/serine-rich 2	SFRS2	6427
200754_x_at	1.08573	0.33644	U133Asc2	splicing factor, arginine/serine-rich 2	SFRS2	6427
200757_s_at	0.999044	0.989203	U133Asc2	calumenin	CALU	813
200758_s_at	0.869201	0.0206981	U133ASc1	nuclear factor (erythroid-derived 2)-like 1	NFE2L1	4779
200759_x_at	1.04063	0.374408	U133ASc1	nuclear factor (erythroid-derived 2)-like 1	NFE2L1	4779
200760_s_at	0.891484	0.276221	U133Asc2	ADP-ribosylation-like factor 6 interacting protein 5	ARL6IP5	10550
200761_s_at	1.01332	0.805786	U133Asc2	ADP-ribosylation-like factor 6 interacting protein 5	ARL6IP5	10550
200762_at	1.00749	0.949142	U133Asc2	dihydropyrimidinase-like 2	DPYSL2	1808
200764_s_at	0.959741	0.495369	U133Asc2	catenin (cadherin-associated protein), alpha 1, 102kDa	CTNNA1	1495
200765_x_at	1.08555	0.340312	U133Asc2	catenin (cadherin-associated protein), alpha 1, 102kDa	CTNNA1	1495
200766_at	0.997722	0.983923	U133Asc2	cathepsin D	CTSD	1509
200767_s_at	1.02545	0.783074	U133Asc2	family with sequence similarity 120A	FAM120A	23196
200768_s_at	1.06534	0.392903	U133Asc2	methionine adenosyltransferase II, alpha	MAT2A	4144
200770_s_at	0.990408	0.905814	U133Asc2	laminin, gamma 1 (formerly LAMB2)	LAMC1	3915
200771_at	0.995869	0.958469	U133Asc2	laminin, gamma 1 (formerly LAMB2)	LAMC1	3915
200772_x_at	1.2974	0.0704467	U133Asc2	prothymosin, alpha (gene sequence 28)	PTMA	5757
200773_x_at	1.02846	0.685888	U133Asc2	prothymosin, alpha (gene sequence 28) /// similar to prothymosin, alpha (gene sequence 28)	LOC643287 /// PTMA	5757 /// 643287
200774_at	1.23641	0.0623325	U133Asc2	family with sequence similarity 120A	FAM120A	23196
200775_s_at	1.02171	0.747692	U133Asc2	heterogeneous nuclear ribonucleoprotein K	HNRPK	3190
200776_s_at	0.822303	0.00650063	U133Asc2	basic leucine zipper and W2 domains 1 /// similar to basic leucine zipper and W2 domains 1	BZW1 /// LOC151579	151579 /// 9689
200777_s_at	0.915123	0.224014	U133Asc2	basic leucine zipper and W2 domains 1 /// similar to basic leucine zipper and W2 domains 1	BZW1 /// LOC151579	151579 /// 9689
200778_s_at	0.923318	0.393364	U133Asc2	septin 2	39327	4735
200779_at	0.921659	0.105501	U133ASc1	activating transcription factor 4 (tax-responsive enhancer element B67)	ATF4	468
200782_at	0.783429	0.0127878	U133Asc2	annexin A5	ANXA5	308
200785_s_at	1.17797	0.0030935	U133Asc2	low density lipoprotein-related protein 1 (alpha-2-macroglobulin receptor)	LRP1	4035
200786_at	0.88924	0.00738224	U133Asc2	proteasome (prosome, macropain) subunit, beta type, 7	PSMB7	5695
200787_s_at	0.895117	0.325505	U133Asc2	phosphoprotein enriched in astrocytes 15	PEA15	8682
200788_s_at	1.27217	0.00278828	U133Asc2	phosphoprotein enriched in astrocytes 15	PEA15	8682
200789_at	1.05517	0.242721	U133ASc1	enoyl Coenzyme A hydratase 1, peroxisomal	ECH1	1891
200790_at	0.868802	0.195395	U133Asc2	ornithine decarboxylase 1	ODC1	4953
200792_at	0.952315	0.200836	U133Asc2	X-ray repair complementing defective repair in Chinese hamster cells 6 (Ku autoantigen, 70kDa)	XRCC6	2547
200793_s_at	1.0534	0.428363	U133ASc1	aconitase 2, mitochondrial	ACO2	50
200794_x_at	0.893098	0.132814	U133Asc2	DAZ associated protein 2	DAZAP2	9802
200795_at	1.01761	0.867971	U133ASc1	SPARC-like 1 (mast9, hevin)	SPARCL1	8404
200797_s_at	1.07193	0.249147	U133Asc2	myeloid cell leukemia sequence 1 (BCL2-related)	MCL1	4170
200798_x_at	1.12177	0.622228	U133Asc2	myeloid cell leukemia sequence 1 (BCL2-related)	MCL1	4170
200799_at	1.18102	0.0512271	U133ASc1	heat shock 70kDa protein 1A	HSPA1A	3303
200800_s_at	1.13465	0.1601	U133ASc1	heat shock 70kDa protein 1A /// heat shock 70kDa protein 1B	HSPA1A /// HSPA1B	3303 /// 3304
200801_x_at	1.06955	0.462915	U133ASc1	actin, beta	ACTB	60
200802_at	0.851977	0.00592478	U133Asc2	seryl-tRNA synthetase	SARS	6301
200803_s_at	0.839193	0.0956707	U133Asc2	testis enhanced gene transcript (BAX inhibitor 1)	TEGT	7009
200804_at	1.20929	0.00551384	U133Asc2	testis enhanced gene transcript (BAX inhibitor 1)	TEGT	7009
200805_at	0.921235	0.0867566	U133Asc2	lectin, mannose-binding 2	LMAN2	10960
200806_s_at	1.00363	0.971277	U133Asc2	heat shock 60kDa protein 1 (chaperonin)	HSPD1	3329
200807_s_at	1.15438	0.0121551	U133ASc1	heat shock 60kDa protein 1 (chaperonin)	HSPD1	3329
200808_s_at	1.04025	0.608317	U133Asc2	zyxin	ZYX	7791
200809_x_at	0.927396	0.24981	U133ASc1	ribosomal protein L12	RPL12	6136
200810_s_at	1.17439	0.0391557	U133ASc1	cold inducible RNA binding protein	CIRBP	1153
200811_at	0.863269	0.0125256	U133Asc2	cold inducible RNA binding protein	CIRBP	1153
200812_at	0.94247	0.252476	U133Asc2	chaperonin containing TCP1, subunit 7 (eta)	CCT7	10574
200813_s_at	0.829375	0.0580129	U133Asc2	platelet-activating factor acetylhydrolase, isoform Ib, alpha subunit 45kDa	PAFAH1B1	5048
200814_at	0.87447	0.0869138	U133Asc2	proteasome (prosome, macropain) activator subunit 1 (PA28 alpha)	PSME1	5720
200815_s_at	1.0641	0.36	U133Asc2	platelet-activating factor acetylhydrolase, isoform Ib, alpha subunit 45kDa	PAFAH1B1	5048
200816_s_at	0.992837	0.904341	U133Asc2	platelet-activating factor acetylhydrolase, isoform Ib, alpha subunit 45kDa	PAFAH1B1	5048
200818_at	1.01782	0.735364	U133ASc1	ATP synthase, H+ transporting, mitochondrial F1 complex, O subunit (oligomycin sensitivity conferring protein)	ATP5O	539
200819_s_at	0.972261	0.398648	U133ASc1	ribosomal protein S15	RPS15	6209
200820_at	0.738715	4.78468e-07	U133Asc2	proteasome (prosome, macropain) 26S subunit, non-ATPase, 8	PSMD8	5714
200821_at	1.11981	0.213115	U133ASc1	lysosomal-associated membrane protein 2	LAMP2	3920
200822_x_at	0.759763	0.000244544	U133ASc1	triosephosphate isomerase 1	TPI1	7167
200823_x_at	0.891752	0.00857789	U133ASc1	ribosomal protein L29	RPL29	6159
200824_at	0.895104	0.14113	U133Asc2	glutathione S-transferase pi	GSTP1	2950
200825_s_at	1.0198	0.782572	U133Asc2	hypoxia up-regulated 1	HYOU1	10525
200826_at	0.904247	0.0228043	U133Asc2	small nuclear ribonucleoprotein D2 polypeptide 16.5kDa	SNRPD2	6633
200827_at	1.30092	0.000684015	U133Asc2	procollagen-lysine 1, 2-oxoglutarate 5-dioxygenase 1	PLOD1	5351
200828_s_at	0.711833	0.000672546	U133Asc2	zinc finger protein 207	ZNF207	7756
200829_x_at	0.912848	0.15128	U133Asc2	zinc finger protein 207	ZNF207	7756
200830_at	0.998404	0.978938	U133ASc1	proteasome (prosome, macropain) 26S subunit, non-ATPase, 2	PSMD2	5708
200833_s_at	0.897222	0.331879	U133Asc2	RAP1B, member of RAS oncogene family	RAP1B	5908
200834_s_at	0.974296	0.654879	U133ASc1	ribosomal protein S21	RPS21	6227
200836_s_at	0.824795	0.0312916	U133Asc2	microtubule-associated protein 4	MAP4	4134
200837_at	1.0147	0.885389	U133Asc2	B-cell receptor-associated protein 31	BCAP31	10134
200838_at	0.86099	0.0623275	U133Asc2	cathepsin B	CTSB	1508
200839_s_at	1.05535	0.488807	U133Asc2	cathepsin B	CTSB	1508
200840_at	1.25589	0.0066324	U133ASc1	lysyl-tRNA synthetase	KARS	3735
200842_s_at	1.11591	0.353874	U133Asc2	glutamyl-prolyl-tRNA synthetase	EPRS	2058
200843_s_at	0.995447	0.92117	U133Asc2	glutamyl-prolyl-tRNA synthetase	EPRS	2058
200844_s_at	0.936308	0.183527	U133ASc1	peroxiredoxin 6	PRDX6	9588
200845_s_at	1.17262	0.00982142	U133ASc1	peroxiredoxin 6	PRDX6	9588
200846_s_at	0.869977	0.0370801	U133Asc2	protein phosphatase 1, catalytic subunit, alpha isoform	PPP1CA	5499
200847_s_at	0.944886	0.409106	U133Asc2	transmembrane protein 66	TMEM66	51669
200848_at	1.09044	0.56649	U133Asc2	S-adenosylhomocysteine hydrolase-like 1	AHCYL1	10768
200849_s_at	0.985973	0.902974	U133Asc2	S-adenosylhomocysteine hydrolase-like 1	AHCYL1	10768
200850_s_at	1.09742	0.468202	U133Asc2	S-adenosylhomocysteine hydrolase-like 1	AHCYL1	10768
200851_s_at	1.05693	0.345044	U133Asc2	KIAA0174	KIAA0174	9798
200852_x_at	0.979082	0.523584	U133Asc2	guanine nucleotide binding protein (G protein), beta polypeptide 2	GNB2	2783
200853_at	1.22136	0.0222363	U133Asc2	H2A histone family, member Z	H2AFZ	3015
200854_at	0.855591	0.00105782	U133Asc2	nuclear receptor co-repressor 1	NCOR1	9611
200855_at	0.923283	0.124347	U133Asc2	nuclear receptor co-repressor 1 /// chromosome 20 open reading frame 191	C20orf191 /// NCOR1	149934 /// 9611
200856_x_at	0.940743	0.461851	U133Asc2	nuclear receptor co-repressor 1 /// chromosome 20 open reading frame 191	C20orf191 /// NCOR1	149934 /// 9611
200857_s_at	0.635558	5.15775e-06	U133Asc2	nuclear receptor co-repressor 1	NCOR1	9611
200858_s_at	1.08774	0.138002	U133ASc1	ribosomal protein S8	RPS8	6202
200859_x_at	0.943927	0.598167	U133Asc2	filamin A, alpha (actin binding protein 280)	FLNA	2316
200860_s_at	1.13114	0.00889397	U133Asc2	CCR4-NOT transcription complex, subunit 1	CNOT1	23019
200861_at	1.03714	0.558116	U133Asc2	CCR4-NOT transcription complex, subunit 1	CNOT1	23019
200862_at	0.804215	0.144703	U133Asc2	24-dehydrocholesterol reductase	DHCR24	1718
200863_s_at	0.921798	0.15598	U133Asc2	RAB11A, member RAS oncogene family	RAB11A	8766
200864_s_at	0.794288	0.0734636	U133Asc2	RAB11A, member RAS oncogene family	RAB11A	8766
200866_s_at	0.751588	0.00444764	U133Asc2	prosaposin (variant Gaucher disease and variant metachromatic leukodystrophy)	PSAP	5660
200867_at	0.926837	0.417642	U133Asc2	zinc finger protein 313	ZNF313	55905
200868_s_at	0.863488	0.00246328	U133Asc2	zinc finger protein 313	ZNF313	55905
200869_at	0.765997	0.000113009	U133ASc1	ribosomal protein L18a /// similar to ribosomal protein L18a; 60S ribosomal protein L18a	LOC390354 /// RPL18A	390354 /// 6142
200870_at	0.921469	0.171927	U133ASc1	serine/threonine kinase receptor associated protein	STRAP	11171
200871_s_at	0.907613	0.0674974	U133ASc1	prosaposin (variant Gaucher disease and variant metachromatic leukodystrophy)	PSAP	5660
200872_at	1.04448	0.680032	U133Asc2	S100 calcium binding protein A10	S100A10	6281
200873_s_at	1.0695	0.245887	U133Asc2	chaperonin containing TCP1, subunit 8 (theta)	CCT8	10694
200874_s_at	0.831965	0.000733873	U133Asc2	nucleolar protein 5A (56kDa with KKE/D repeat)	NOL5A	10528
200875_s_at	1.45691	0.000846201	U133Asc2	nucleolar protein 5A (56kDa with KKE/D repeat)	NOL5A	10528
200876_s_at	1.00003	0.999504	U133ASc1	proteasome (prosome, macropain) subunit, beta type, 1	PSMB1	5689
200877_at	1.08879	0.0535988	U133Asc2	chaperonin containing TCP1, subunit 4 (delta)	CCT4	10575
200878_at	1.04848	0.55988	U133ASc1	endothelial PAS domain protein 1	EPAS1	2034
200880_at	1.00901	0.909894	U133Asc2	DnaJ (Hsp40) homolog, subfamily A, member 1	DNAJA1	3301
200881_s_at	0.997227	0.972852	U133Asc2	DnaJ (Hsp40) homolog, subfamily A, member 1	DNAJA1	3301
200882_s_at	0.921821	0.0878605	U133Asc2	proteasome (prosome, macropain) 26S subunit, non-ATPase, 4	PSMD4	5710
200883_at	0.817547	0.0169839	U133Asc2	ubiquinol-cytochrome c reductase core protein II	UQCRC2	7385
200884_at	1.13904	0.580107	U133Asc2	creatine kinase, brain	CKB	1152
200885_at	0.801805	0.0327783	U133Asc2	ras homolog gene family, member C	RHOC	389
200886_s_at	1.02945	0.502702	U133Asc2	phosphoglycerate mutase 1 (brain) /// phosphoglycerate mutase 1 /// phosphoglycerate mutase 1-like	hCG_2015138 /// hCG_2015269 /// PGAM1	5223 /// 642969 /// 643576
200887_s_at	0.667597	0.4728	U133ASc1	signal transducer and activator of transcription 1, 91kDa	STAT1	6772
200888_s_at	0.857186	0.0138535	U133ASc1	ribosomal protein L23	RPL23	9349
200889_s_at	0.810975	0.102586	U133Asc2	signal sequence receptor, alpha (translocon-associated protein alpha)	SSR1	6745
200891_s_at	0.850212	0.0601194	U133Asc2	signal sequence receptor, alpha (translocon-associated protein alpha)	SSR1	6745
200892_s_at	0.897322	0.0955114	U133Asc2	splicing factor, arginine/serine-rich 10 (transformer 2 homolog, Drosophila)	SFRS10	6434
200893_at	0.907478	0.188406	U133Asc2	splicing factor, arginine/serine-rich 10 (transformer 2 homolog, Drosophila)	SFRS10	6434
200895_s_at	1.13091	0.0414233	U133Asc2	FK506 binding protein 4, 59kDa	FKBP4	2288
200896_x_at	0.998114	0.978016	U133ASc1	hepatoma-derived growth factor (high-mobility group protein 1-like)	HDGF	3068
200897_s_at	1.27921	0.00131131	U133ASc1	palladin, cytoskeletal associated protein	PALLD	23022
200899_s_at	1.06623	0.454984	U133Asc2	meningioma expressed antigen 5 (hyaluronidase)	MGEA5	10724
200901_s_at	0.853929	0.00177877	U133Asc2	mannose-6-phosphate receptor (cation dependent)	M6PR	4074
200902_at	0.991961	0.920138	U133Asc2	15 kDa selenoprotein	39340	9403
200903_s_at	0.94196	0.355273	U133Asc2	S-adenosylhomocysteine hydrolase	AHCY	191
200904_at	1.1944	0.0457343	U133Asc2	major histocompatibility complex, class I, E	HLA-E	3133
200905_x_at	0.980811	0.807183	U133Asc2	major histocompatibility complex, class I, E	HLA-E	3133
200906_s_at	1.00152	0.993098	U133Asc2	palladin, cytoskeletal associated protein	PALLD	23022
200907_s_at	1.45665	0.000469446	U133Asc2	palladin, cytoskeletal associated protein	PALLD	23022
200909_s_at	0.893832	0.0748961	U133ASc1	ribosomal protein, large, P2	RPLP2	6181
200910_at	1.146	0.0284106	U133Asc2	chaperonin containing TCP1, subunit 3 (gamma)	CCT3	7203
200911_s_at	1.12432	0.2644	U133Asc2	transforming, acidic coiled-coil containing protein 1	TACC1	6867
200912_s_at	0.928916	0.174541	U133ASc1	eukaryotic translation initiation factor 4A, isoform 2	EIF4A2	1974
200913_at	0.79343	0.00055061	U133Asc2	protein phosphatase 1G (formerly 2C), magnesium-dependent, gamma isoform	PPM1G	5496
200914_x_at	1.53606	0.00230758	U133Asc2	kinectin 1 (kinesin receptor)	KTN1	3895
200915_x_at	1.0014	0.984474	U133ASc1	kinectin 1 (kinesin receptor)	KTN1	3895
200918_s_at	0.952915	0.547059	U133Asc2	signal recognition particle receptor ('docking protein')	SRPR	6734
200919_at	1.0302	0.721778	U133Asc2	polyhomeotic homolog 2 (Drosophila)	PHC2	1912
200920_s_at	1.18688	0.110451	U133Asc2	B-cell translocation gene 1, anti-proliferative	BTG1	694
200921_s_at	1.16786	0.265709	U133Asc2	B-cell translocation gene 1, anti-proliferative	BTG1	694
200922_at	1.07528	0.394059	U133Asc2	KDEL (Lys-Asp-Glu-Leu) endoplasmic reticulum protein retention receptor 1	KDELR1	10945
200925_at	0.740659	0.000157938	U133Asc2	cytochrome c oxidase subunit VIa polypeptide 1	COX6A1	1337
200927_s_at	0.845048	0.117396	U133Asc2	RAB14, member RAS oncogene family	RAB14	51552
200928_s_at	0.94679	0.581711	U133Asc2	RAB14, member RAS oncogene family	RAB14	51552
200929_at	0.687426	1.1216e-05	U133Asc2	transmembrane emp24-like trafficking protein 10 (yeast)	TMED10	10972
200931_s_at	1.21749	0.00149289	U133Asc2	vinculin	VCL	7414
200932_s_at	0.924417	0.070635	U133Asc2	dynactin 2 (p50)	DCTN2	10540
200934_at	1.19669	0.048287	U133Asc2	DEK oncogene (DNA binding)	DEK	7913
200936_at	0.810024	0.000111428	U133ASc1	ribosomal protein L8	RPL8	6132
200937_s_at	1.10665	0.157527	U133ASc1	ribosomal protein L5	RPL5	6125
200940_s_at	1.24709	0.000319653	U133Asc2	arginine-glutamic acid dipeptide (RE) repeats	RERE	473
200941_at	0.988496	0.844346	U133Asc2	heat shock factor binding protein 1	HSBP1	3281
200942_s_at	0.844185	0.00058891	U133Asc2	heat shock factor binding protein 1	HSBP1	3281
200943_at	0.948535	0.633878	U133Asc2	high-mobility group nucleosome binding domain 1	HMGN1	3150
200944_s_at	1.0232	0.747942	U133Asc2	high-mobility group nucleosome binding domain 1	HMGN1	3150
200945_s_at	0.918856	0.203266	U133Asc2	SEC31 homolog A (S. cerevisiae)	SEC31A	22872
200946_x_at	0.75324	0.00248598	U133Asc2	glutamate dehydrogenase 1	GLUD1	2746
200948_at	0.982168	0.775058	U133Asc2	myeloid leukemia factor 2	MLF2	8079
200950_at	0.949261	0.296649	U133Asc2	actin related protein 2/3 complex, subunit 1A, 41kDa	ARPC1A	10552
200953_s_at	0.949356	0.679686	U133Asc2	cyclin D2	CCND2	894
200955_at	0.946681	0.386268	U133Asc2	inner membrane protein, mitochondrial (mitofilin)	IMMT	10989
200956_s_at	0.986434	0.873427	U133Asc2	structure specific recognition protein 1	SSRP1	6749
200957_s_at	1.0316	0.646802	U133Asc2	structure specific recognition protein 1	SSRP1	6749
200958_s_at	1.01207	0.884118	U133Asc2	syndecan binding protein (syntenin)	SDCBP	6386
200959_at	1.11347	0.00175931	U133Asc2	fusion (involved in t(12;16) in malignant liposarcoma)	FUS	2521
200960_x_at	0.954309	0.314938	U133Asc2	clathrin, light chain (Lca)	CLTA	1211
200961_at	0.891269	0.143046	U133Asc2	selenophosphate synthetase 2	SEPHS2	22928
200962_at	0.917753	0.0172193	U133Asc2	ribosomal protein L31 /// similar to ribosomal protein L31 /// ribosomal protein L31 pseudogene 4 /// ribosomal protein L31 pseudogene 10 /// hypothetical protein LOC729646	LOC285260 /// LOC641790 /// LOC646841 /// LOC648737 /// LOC653773 /// LOC727792 /// LOC729646 /// LOC732015 /// RPL31 /// RPL31P10 /// RPL31P4	285260 /// 387991 /// 390283 /// 6160 /// 641790 /// 646841 /// 648737 /// 653773 /// 727792 /// 729646 /// 732015
200964_at	1.26537	0.00693899	U133Asc2	ubiquitin-activating enzyme E1 (A1S9T and BN75 temperature sensitivity complementing)	UBE1	7317
200965_s_at	0.868195	0.192949	U133Asc2	actin binding LIM protein 1	ABLIM1	3983
200967_at	0.728288	0.0197808	U133Asc2	peptidylprolyl isomerase B (cyclophilin B)	PPIB	5479
200968_s_at	0.527459	0.00151062	U133Asc2	peptidylprolyl isomerase B (cyclophilin B)	PPIB	5479
200969_at	1.10396	0.46614	U133Asc2	stress-associated endoplasmic reticulum protein 1	SERP1	27230
200970_s_at	0.873967	0.186283	U133Asc2	stress-associated endoplasmic reticulum protein 1	SERP1	27230
200971_s_at	0.879305	0.0997377	U133Asc2	stress-associated endoplasmic reticulum protein 1	SERP1	27230
200972_at	0.770285	0.000560511	U133ASc1	tetraspanin 3	TSPAN3	10099
200973_s_at	0.599782	3.66589e-05	U133Asc2	tetraspanin 3	TSPAN3	10099
200974_at	0.870334	0.529032	U133Asc2	actin, alpha 2, smooth muscle, aorta	ACTA2	59
200975_at	0.902976	0.21264	U133Asc2	palmitoyl-protein thioesterase 1 (ceroid-lipofuscinosis, neuronal 1, infantile)	PPT1	5538
200976_s_at	1.18077	0.0662729	U133Asc2	Tax1 (human T-cell leukemia virus type I) binding protein 1	TAX1BP1	8887
200977_s_at	1.08357	0.223064	U133Asc2	Tax1 (human T-cell leukemia virus type I) binding protein 1	TAX1BP1	8887
200978_at	1.01519	0.845638	U133ASc1	malate dehydrogenase 1, NAD (soluble)	MDH1	4190
200979_at	1.41878	0.224557	U133Asc2	CDNA FLJ34891 fis, clone NT2NE2017562 /// Mitogen-activated protein kinase kinase kinase 15	MAP3K15	0 /// 389840
200980_s_at	0.8643	0.0246269	U133ASc1	pyruvate dehydrogenase (lipoamide) alpha 1	PDHA1	5160
200982_s_at	1.16888	0.0565009	U133Asc2	annexin A6	ANXA6	309
200983_x_at	0.763205	0.01857	U133ASc1	CD59 molecule, complement regulatory protein	CD59	966
200984_s_at	0.918561	0.194787	U133Asc2	CD59 molecule, complement regulatory protein	CD59	966
200985_s_at	0.963105	0.508844	U133Asc2	CD59 molecule, complement regulatory protein	CD59	966
200986_at	1.03833	0.770611	U133Asc2	serpin peptidase inhibitor, clade G (C1 inhibitor), member 1, (angioedema, hereditary)	SERPING1	710
200988_s_at	1.44415	0.0301747	U133Asc2	proteasome (prosome, macropain) activator subunit 3 (PA28 gamma; Ki)	PSME3	10197
200989_at	0.960612	0.723781	U133Asc2	hypoxia-inducible factor 1, alpha subunit (basic helix-loop-helix transcription factor)	HIF1A	3091
200990_at	1.03179	0.666624	U133Asc2	tripartite motif-containing 28	TRIM28	10155
200992_at	1.04695	0.657112	U133Asc2	importin 7	IPO7	10527
200993_at	1.03836	0.691192	U133Asc2	importin 7	IPO7	10527
200994_at	1.12598	0.0947445	U133Asc2	Importin 7	IPO7	10527
200995_at	1.11955	0.0152633	U133Asc2	Importin 7	IPO7	10527
200996_at	0.936043	0.514545	U133Asc2	ARP3 actin-related protein 3 homolog (yeast)	ACTR3	10096
200997_at	0.842594	0.00943176	U133Asc2	RNA binding motif protein 4	RBM4	5936
200998_s_at	1.01723	0.88277	U133Asc2	cytoskeleton-associated protein 4	CKAP4	10970
201000_at	0.914768	0.0543192	U133Asc2	alanyl-tRNA synthetase	AARS	16
201001_s_at	1.15064	0.223076	U133Asc2	ubiquitin-conjugating enzyme E2 variant 1	Kua-UEV /// UBE2V1	387522 /// 7335
201002_s_at	1.11361	0.20683	U133Asc2	ubiquitin-conjugating enzyme E2 variant 1	Kua-UEV /// UBE2V1	387522 /// 7335
201003_x_at	1.29621	0.00761171	U133Asc2	arginyl aminopeptidase (aminopeptidase B) /// ubiquitin-conjugating enzyme E2 variant 1 /// ubiquitin-conjugating enzyme variant Kua /// similar to ubiquitin-conjugating enzyme E2 variant 1 isoform d	Kua /// Kua-UEV /// LOC730052 /// LOC732137 /// RNPEP /// UBE2V1	387521 /// 387522 /// 6051 /// 730052 /// 732137 /// 7335
201004_at	0.794398	0.00125289	U133Asc2	signal sequence receptor, delta (translocon-associated protein delta)	SSR4	6748
201005_at	0.859272	0.348682	U133Asc2	CD9 molecule	CD9	928
201006_at	0.954125	0.116262	U133Asc2	peroxiredoxin 2	PRDX2	7001
201007_at	1.20082	0.0198004	U133ASc1	hydroxyacyl-Coenzyme A dehydrogenase/3-ketoacyl-Coenzyme A thiolase/enoyl-Coenzyme A hydratase (trifunctional protein), beta subunit	HADHB	3032
201008_s_at	0.957196	0.878994	U133ASc1	thioredoxin interacting protein	TXNIP	10628
201009_s_at	1.1612	0.477565	U133ASc1	thioredoxin interacting protein	TXNIP	10628
201010_s_at	1.08844	0.517424	U133ASc1	thioredoxin interacting protein	TXNIP	10628
201011_at	0.75581	0.000385919	U133Asc2	ribophorin I	RPN1	6184
201012_at	1.10789	0.61954	U133Asc2	annexin A1	ANXA1	301
201013_s_at	1.14249	0.0405189	U133Asc2	phosphoribosylaminoimidazole carboxylase, phosphoribosylaminoimidazole succinocarboxamide synthetase	PAICS	10606
201014_s_at	0.978237	0.844871	U133Asc2	phosphoribosylaminoimidazole carboxylase, phosphoribosylaminoimidazole succinocarboxamide synthetase	PAICS	10606
201015_s_at	1.04356	0.525234	U133Asc2	junction plakoglobin	JUP	3728
201016_at	1.7695	2.55255e-07	U133Asc2	eukaryotic translation initiation factor 1A, X-linked	EIF1AX	1964
201017_at	1.64399	0.000290896	U133Asc2	eukaryotic translation initiation factor 1A, X-linked	EIF1AX	1964
201018_at	1.53857	1.09099e-05	U133Asc2	eukaryotic translation initiation factor 1A, X-linked	EIF1AX	1964
201019_s_at	1.83783	1.78628e-05	U133Asc2	eukaryotic translation initiation factor 1A, X-linked /// eukaryotic translation initiation factor 1A pseudogene 1	EIF1AP1 /// EIF1AX	1964 /// 280661
201020_at	0.601732	0.000144046	U133Asc2	tyrosine 3-monooxygenase/tryptophan 5-monooxygenase activation protein, eta polypeptide	YWHAH	7533
201021_s_at	0.816752	0.096762	U133Asc2	destrin (actin depolymerizing factor)	DSTN	11034
201022_s_at	0.957407	0.704188	U133Asc2	destrin (actin depolymerizing factor)	DSTN	11034
201023_at	1.03556	0.565155	U133Asc2	TAF7 RNA polymerase II, TATA box binding protein (TBP)-associated factor, 55kDa	TAF7	6879
201024_x_at	1.56921	2.59577e-09	U133Asc2	eukaryotic translation initiation factor 5B	EIF5B	9669
201025_at	1.11711	0.272876	U133Asc2	eukaryotic translation initiation factor 5B	EIF5B	9669
201026_at	1.12639	0.485523	U133Asc2	eukaryotic translation initiation factor 5B	EIF5B	9669
201027_s_at	0.939637	0.294649	U133Asc2	eukaryotic translation initiation factor 5B	EIF5B	9669
201028_s_at	0.732117	0.00105564	U133Asc2	CD99 molecule	CD99	4267
201029_s_at	0.893797	0.235012	U133Asc2	CD99 molecule	CD99	4267
201030_x_at	1.71975	0.00429913	U133ASc1	lactate dehydrogenase B	LDHB	3945
201031_s_at	0.99015	0.883502	U133Asc2	heterogeneous nuclear ribonucleoprotein H1 (H)	HNRPH1	3187
201032_at	1.11298	0.0583678	U133ASc1	bladder cancer associated protein	BLCAP	10904
201034_at	1.12481	0.472281	U133Asc2	adducin 3 (gamma)	ADD3	120
201035_s_at	0.771729	0.000986217	U133ASc1	hydroxyacyl-Coenzyme A dehydrogenase	HADH	3033
201036_s_at	0.95776	0.43561	U133ASc1	hydroxyacyl-Coenzyme A dehydrogenase	HADH	3033
201038_s_at	0.944954	0.213075	U133Asc2	Acidic (leucine-rich) nuclear phosphoprotein 32 family, member A	ANP32A	8125
201039_s_at	1.2695	0.0275483	U133ASc1	RAD23 homolog A (S. cerevisiae)	RAD23A	5886
201041_s_at	0.959569	0.724469	U133Asc2	dual specificity phosphatase 1	DUSP1	1843
201042_at	1.0459	0.624559	U133Asc2	transglutaminase 2 (C polypeptide, protein-glutamine-gamma-glutamyltransferase)	TGM2	7052
201046_s_at	1.26705	0.00182916	U133ASc1	RAD23 homolog A (S. cerevisiae)	RAD23A	5886
201047_x_at	1.0553	0.409827	U133Asc2	RAB6A, member RAS oncogene family	RAB6A	5870
201050_at	0.920058	0.367943	U133Asc2	phospholipase D family, member 3	PLD3	23646
201051_at	0.944486	0.37357	U133Asc2	acidic (leucine-rich) nuclear phosphoprotein 32 family, member A	ANP32A	8125
201052_s_at	0.715051	6.74445e-08	U133Asc2	proteasome (prosome, macropain) inhibitor subunit 1 (PI31)	PSMF1	9491
201053_s_at	1.15571	0.156545	U133Asc2	proteasome (prosome, macropain) inhibitor subunit 1 (PI31)	PSMF1	9491
201054_at	0.937583	0.314322	U133Asc2	heterogeneous nuclear ribonucleoprotein A0	HNRPA0	10949
201055_s_at	0.719805	0.00403424	U133Asc2	heterogeneous nuclear ribonucleoprotein A0	HNRPA0	10949
201056_at	0.885572	0.283605	U133Asc2	Golgi autoantigen, golgin subfamily b, macrogolgin (with transmembrane signal), 1	GOLGB1	2804
201057_s_at	0.987176	0.92098	U133Asc2	golgi autoantigen, golgin subfamily b, macrogolgin (with transmembrane signal), 1	GOLGB1	2804
201059_at	0.928066	0.339986	U133Asc2	cortactin	CTTN	2017
201060_x_at	0.991442	0.939058	U133Asc2	stomatin	STOM	2040
201061_s_at	1.11925	0.09585	U133Asc2	stomatin	STOM	2040
201063_at	0.718142	0.0105366	U133Asc2	reticulocalbin 1, EF-hand calcium binding domain	RCN1	5954
201064_s_at	0.75321	3.8717e-07	U133ASc1	poly(A) binding protein, cytoplasmic 4 (inducible form)	PABPC4	8761
201065_s_at	1.00901	0.917247	U133Asc2	general transcription factor II, i /// general transcription factor II, i, pseudogene 1 /// similar to general transcription factor II, i isoform 1	GTF2I /// GTF2IP1 /// LOC732437	2969 /// 2970 /// 732437
201066_at	0.908728	0.0566358	U133ASc1	cytochrome c-1	CYC1	1537
201067_at	1.48502	0.000310366	U133Asc2	---	---	---
201068_s_at	0.91575	0.233933	U133Asc2	proteasome (prosome, macropain) 26S subunit, ATPase, 2	PSMC2	5701
201069_at	0.909869	0.556672	U133Asc2	matrix metallopeptidase 2 (gelatinase A, 72kDa gelatinase, 72kDa type IV collagenase)	MMP2	4313
201070_x_at	0.894313	0.482992	U133Asc2	splicing factor 3b, subunit 1, 155kDa	SF3B1	23451
201071_x_at	0.995607	0.944193	U133Asc2	splicing factor 3b, subunit 1, 155kDa	SF3B1	23451
201073_s_at	0.970581	0.229095	U133Asc2	SWI/SNF related, matrix associated, actin dependent regulator of chromatin, subfamily c, member 1	SMARCC1	6599
201074_at	1.12511	0.343324	U133Asc2	SWI/SNF related, matrix associated, actin dependent regulator of chromatin, subfamily c, member 1	SMARCC1	6599
201075_s_at	1.12286	0.111597	U133Asc2	SWI/SNF related, matrix associated, actin dependent regulator of chromatin, subfamily c, member 1	SMARCC1	6599
201076_at	1.09827	0.106953	U133Asc2	NHP2 non-histone chromosome protein 2-like 1 (S. cerevisiae)	NHP2L1	4809
201077_s_at	0.886052	0.00455657	U133Asc2	NHP2 non-histone chromosome protein 2-like 1 (S. cerevisiae)	NHP2L1	4809
201078_at	0.723449	0.000274513	U133Asc2	transmembrane 9 superfamily member 2	TM9SF2	9375
201079_at	0.864405	0.0362573	U133Asc2	synaptogyrin 2	SYNGR2	9144
201080_at	1.15807	0.00247835	U133Asc2	phosphatidylinositol-4-phosphate 5-kinase, type II, beta	PIP5K2B	8396
201082_s_at	1.24544	0.0936267	U133Asc2	dynactin 1 (p150, glued homolog, Drosophila)	DCTN1	1639
201083_s_at	0.848839	0.319119	U133Asc2	BCL2-associated transcription factor 1	BCLAF1	9774
201084_s_at	1.01337	0.824287	U133Asc2	BCL2-associated transcription factor 1	BCLAF1	9774
201086_x_at	1.14126	0.016742	U133Asc2	SON DNA binding protein	SON	6651
201087_at	0.998421	0.973866	U133Asc2	paxillin	PXN	5829
201088_at	1.17032	0.478894	U133Asc2	karyopherin alpha 2 (RAG cohort 1, importin alpha 1)	KPNA2	3838
201089_at	0.802917	0.00570387	U133Asc2	ATPase, H+ transporting, lysosomal 56/58kDa, V1 subunit B2	ATP6V1B2	526
201090_x_at	1.30426	0.000606897	U133ASc1	tubulin, alpha 1b	TUBA1B	10376
201091_s_at	0.866464	0.0792878	U133Asc2	chromobox homolog 3 (HP1 gamma homolog, Drosophila) /// similar to chromobox homolog 3	CBX3 /// LOC653972	11335 /// 653972
201092_at	1.26199	0.00029035	U133Asc2	retinoblastoma binding protein 7	RBBP7	5931
201093_x_at	1.00916	0.871801	U133ASc1	succinate dehydrogenase complex, subunit A, flavoprotein (Fp)	SDHA	6389
201096_s_at	0.877121	0.203324	U133Asc2	ADP-ribosylation factor 4	ARF4	378
201097_s_at	0.982772	0.809051	U133Asc2	ADP-ribosylation factor 4	ARF4	378
201098_at	0.878704	0.0809096	U133Asc2	coatomer protein complex, subunit beta 2 (beta prime)	COPB2	9276
201099_at	1.15519	0.0214304	U133Asc2	ubiquitin specific peptidase 9, X-linked	USP9X	8239
201100_s_at	1.1801	0.0147033	U133Asc2	ubiquitin specific peptidase 9, X-linked	USP9X	8239
201102_s_at	0.882161	0.10906	U133Asc2	phosphofructokinase, liver	PFKL	5211
201103_x_at	1.19283	0.0862396	U133Asc2	neuroblastoma breakpoint family, member 11 /// neuroblastoma breakpoint family, member 15 /// neuroblastoma breakpoint family, member 10 /// neuroblastoma breakpoint family, member 8 /// similar to CG10522-PA /// hypothetical protein LOC728980	LOC728936 /// LOC728980 /// NBPF10 /// NBPF11 /// NBPF15 /// NBPF8	200030 /// 284565 /// 440673 /// 641559 /// 728936 /// 728980
201104_x_at	0.933955	0.387483	U133Asc2	neuroblastoma breakpoint family, member 14 /// neuroblastoma breakpoint family, member 11 /// neuroblastoma breakpoint family, member 15 /// neuroblastoma breakpoint family, member 10 /// neuroblastoma breakpoint family, member 8 /// similar to CG10522-PA /// hypothetical protein LOC728980 /// hypothetical protein LOC730476	LOC728936 /// LOC728980 /// LOC730476 /// NBPF10 /// NBPF11 /// NBPF14 /// NBPF15 /// NBPF8	200030 /// 25832 /// 284565 /// 440673 /// 641559 /// 728936 /// 728980 /// 730476
201105_at	0.854941	0.127624	U133ASc1	lectin, galactoside-binding, soluble, 1 (galectin 1)	LGALS1	3956
201106_at	1.01737	0.755016	U133ASc1	glutathione peroxidase 4 (phospholipid hydroperoxidase)	GPX4	2879
201111_at	1.23915	0.00604557	U133Asc2	CSE1 chromosome segregation 1-like (yeast)	CSE1L	1434
201112_s_at	1.04048	0.49111	U133Asc2	CSE1 chromosome segregation 1-like (yeast)	CSE1L	1434
201113_at	0.888292	0.0485429	U133Asc2	Tu translation elongation factor, mitochondrial	TUFM	7284
201114_x_at	1.15113	0.0671552	U133ASc1	proteasome (prosome, macropain) subunit, alpha type, 7	PSMA7	5688
201115_at	0.919834	0.208907	U133Asc2	polymerase (DNA directed), delta 2, regulatory subunit 50kDa	POLD2	5425
201117_s_at	0.968358	0.880221	U133Asc2	carboxypeptidase E	CPE	1363
201119_s_at	0.881425	0.0379805	U133ASc1	cytochrome c oxidase subunit 8A (ubiquitous)	COX8A	1351
201121_s_at	0.999883	0.998911	U133Asc2	progesterone receptor membrane component 1	PGRMC1	10857
201122_x_at	0.753691	0.00656791	U133Asc2	eukaryotic translation initiation factor 5A	EIF5A	1984
201123_s_at	0.427203	0.00103852	U133Asc2	eukaryotic translation initiation factor 5A	EIF5A	1984
201124_at	1.03343	0.772862	U133Asc2	integrin, beta 5	ITGB5	3693
201125_s_at	0.98748	0.872642	U133Asc2	integrin, beta 5	ITGB5	3693
201126_s_at	1.05713	0.485117	U133Asc2	mannosyl (alpha-1,3-)-glycoprotein beta-1,2-N-acetylglucosaminyltransferase	MGAT1	4245
201128_s_at	1.05449	0.606622	U133Asc2	ATP citrate lyase	ACLY	47
201129_at	1.48209	0.00741509	U133Asc2	splicing factor, arginine/serine-rich 7, 35kDa	SFRS7	6432
201132_at	0.844258	0.0133936	U133Asc2	heterogeneous nuclear ribonucleoprotein H2 (H')	HNRPH2	3188
201133_s_at	0.92573	0.390607	U133Asc2	praja 2, RING-H2 motif containing	PJA2	9867
201135_at	1.11751	0.0726267	U133Asc2	enoyl Coenzyme A hydratase, short chain, 1, mitochondrial	ECHS1	1892
201136_at	0.860106	0.188244	U133Asc2	proteolipid protein 2 (colonic epithelium-enriched)	PLP2	5355
201137_s_at	0.88343	0.367171	U133Asc2	major histocompatibility complex, class II, DP beta 1	HLA-DPB1	3115
201138_s_at	1.07678	0.492818	U133Asc2	Sjogren syndrome antigen B (autoantigen La)	SSB	6741
201139_s_at	1.18371	0.0109918	U133Asc2	Sjogren syndrome antigen B (autoantigen La)	SSB	6741
201140_s_at	1.03387	0.737166	U133Asc2	RAB5C, member RAS oncogene family	RAB5C	5878
201141_at	0.689645	0.0877458	U133Asc2	glycoprotein (transmembrane) nmb	GPNMB	10457
201142_at	0.841253	0.00776366	U133Asc2	eukaryotic translation initiation factor 2, subunit 1 alpha, 35kDa	EIF2S1	1965
201143_s_at	1.07267	0.415467	U133Asc2	eukaryotic translation initiation factor 2, subunit 1 alpha, 35kDa	EIF2S1	1965
201144_s_at	1.05359	0.402736	U133Asc2	eukaryotic translation initiation factor 2, subunit 1 alpha, 35kDa	EIF2S1	1965
201145_at	0.936368	0.0418316	U133Asc2	HCLS1 associated protein X-1	HAX1	10456
201146_at	0.95712	0.590847	U133Asc2	nuclear factor (erythroid-derived 2)-like 2	NFE2L2	4780
201147_s_at	0.781452	0.0777941	U133Asc2	TIMP metallopeptidase inhibitor 3 (Sorsby fundus dystrophy, pseudoinflammatory)	TIMP3	7078
201149_s_at	0.81279	0.0466566	U133Asc2	TIMP metallopeptidase inhibitor 3 (Sorsby fundus dystrophy, pseudoinflammatory)	TIMP3	7078
201150_s_at	0.982915	0.887424	U133Asc2	TIMP metallopeptidase inhibitor 3 (Sorsby fundus dystrophy, pseudoinflammatory)	TIMP3	7078
201151_s_at	0.756875	0.18528	U133Asc2	muscleblind-like (Drosophila)	MBNL1	4154
201152_s_at	1.03988	0.662185	U133ASc1	muscleblind-like (Drosophila)	MBNL1	4154
201153_s_at	1.07772	0.218166	U133ASc1	muscleblind-like (Drosophila)	MBNL1	4154
201155_s_at	1.1209	0.0433999	U133ASc1	mitofusin 2	MFN2	9927
201157_s_at	1.10153	0.237168	U133Asc2	N-myristoyltransferase 1	NMT1	4836
201162_at	1.1435	0.375444	U133ASc1	insulin-like growth factor binding protein 7	IGFBP7	3490
201163_s_at	1.06906	0.639912	U133ASc1	insulin-like growth factor binding protein 7	IGFBP7	3490
201164_s_at	1.16471	0.00762269	U133Asc2	pumilio homolog 1 (Drosophila)	PUM1	9698
201165_s_at	0.998159	0.980246	U133Asc2	pumilio homolog 1 (Drosophila)	PUM1	9698
201166_s_at	0.946168	0.35741	U133ASc1	pumilio homolog 1 (Drosophila)	PUM1	9698
201170_s_at	1.16649	0.273159	U133Asc2	basic helix-loop-helix domain containing, class B, 2	BHLHB2	8553
201172_x_at	0.923032	0.326561	U133Asc2	ATPase, H+ transporting, lysosomal 9kDa, V0 subunit e1	ATP6V0E1	8992
201173_x_at	0.920537	0.14283	U133Asc2	nuclear distribution gene C homolog (A. nidulans)	NUDC	10726
201174_s_at	1.00418	0.952431	U133Asc2	telomeric repeat binding factor 2, interacting protein	TERF2IP	54386
201175_at	0.947364	0.612312	U133Asc2	thioredoxin domain containing 14	TXNDC14	51075
201176_s_at	1.08839	0.134327	U133Asc2	archain 1	ARCN1	372
201177_s_at	0.866362	0.0396826	U133ASc1	SUMO1 activating enzyme subunit 2	SAE2	10054
201178_at	1.04694	0.392315	U133Asc2	F-box protein 7	FBXO7	25793
201179_s_at	0.771672	0.010511	U133Asc2	guanine nucleotide binding protein (G protein), alpha inhibiting activity polypeptide 3	GNAI3	2773
201180_s_at	0.985364	0.891478	U133Asc2	guanine nucleotide binding protein (G protein), alpha inhibiting activity polypeptide 3	GNAI3	2773
201182_s_at	1.02689	0.660407	U133Asc2	chromodomain helicase DNA binding protein 4	CHD4	1108
201183_s_at	0.9294	0.184134	U133Asc2	chromodomain helicase DNA binding protein 4	CHD4	1108
201185_at	1.71025	0.000914729	U133Asc2	HtrA serine peptidase 1	HTRA1	5654
201186_at	0.907635	0.0763549	U133ASc1	low density lipoprotein receptor-related protein associated protein 1	LRPAP1	4043
201187_s_at	0.945435	0.187568	U133ASc1	inositol 1,4,5-triphosphate receptor, type 3	ITPR3	3710
201190_s_at	1.1746	0.0427429	U133Asc2	phosphatidylinositol transfer protein, alpha	PITPNA	5306
201192_s_at	1.25084	0.0160503	U133Asc2	phosphatidylinositol transfer protein, alpha	PITPNA	5306
201193_at	1.04049	0.543618	U133Asc2	isocitrate dehydrogenase 1 (NADP+), soluble	IDH1	3417
201194_at	1.22068	0.00747663	U133ASc1	selenoprotein W, 1	SEPW1	6415
201196_s_at	0.825803	0.256332	U133Asc2	adenosylmethionine decarboxylase 1	AMD1	262
201197_at	1.02575	0.757334	U133Asc2	adenosylmethionine decarboxylase 1	AMD1	262
201198_s_at	1.21587	0.0382637	U133Asc2	proteasome (prosome, macropain) 26S subunit, non-ATPase, 1	PSMD1	5707
201199_s_at	1.19241	0.000261448	U133Asc2	proteasome (prosome, macropain) 26S subunit, non-ATPase, 1	PSMD1	5707
201200_at	1.10164	0.252897	U133Asc2	cellular repressor of E1A-stimulated genes 1	CREG1	8804
201201_at	0.851381	0.0267548	U133Asc2	cystatin B (stefin B)	CSTB	1476
201202_at	0.980289	0.796557	U133Asc2	proliferating cell nuclear antigen	PCNA	5111
201205_at	1.00132	0.983538	U133Asc2	---	---	---
201207_at	0.930743	0.127576	U133Asc2	tumor necrosis factor, alpha-induced protein 1 (endothelial)	TNFAIP1	7126
201209_at	0.953229	0.504818	U133Asc2	histone deacetylase 1	HDAC1	3065
201210_at	1.30398	0.00403298	U133Asc2	DEAD (Asp-Glu-Ala-Asp) box polypeptide 3, X-linked	DDX3X	1654
201214_s_at	0.976637	0.744258	U133Asc2	protein phosphatase 1, regulatory (inhibitor) subunit 7	PPP1R7	5510
201215_at	1.16591	0.315534	U133Asc2	plastin 3 (T isoform)	PLS3	5358
201216_at	0.994736	0.885019	U133Asc2	endoplasmic reticulum protein 29	ERP29	10961
201217_x_at	1.03882	0.512313	U133ASc1	ribosomal protein L3	RPL3	6122
201218_at	1.40195	0.00403791	U133Asc2	C-terminal binding protein 2 /// similar to C-terminal binding protein 2 /// similar to C-terminal-binding protein 2 (CtBP2)	CTBP2 /// LOC642909 /// LOC645291 /// LOC645508 /// LOC649922 /// LOC650999	1488 /// 642909 /// 645291 /// 645508 /// 649922 /// 650999
201219_at	1.09911	0.123288	U133Asc2	C-terminal binding protein 2 /// similar to C-terminal-binding protein 2 (CtBP2) /// similar to C-terminal binding protein 2	CTBP2 /// LOC645291 /// LOC650999	1488 /// 645291 /// 650999
201220_x_at	1.70467	7.39984e-07	U133Asc2	C-terminal binding protein 2	CTBP2	1488
201221_s_at	1.4056	0.00077886	U133Asc2	small nuclear ribonucleoprotein 70kDa polypeptide (RNP antigen)	SNRP70	6625
201222_s_at	2.26781	0.0556859	U133Asc2	RAD23 homolog B (S. cerevisiae)	RAD23B	5887
201223_s_at	1.0764	0.398651	U133Asc2	RAD23 homolog B (S. cerevisiae)	RAD23B	5887
201225_s_at	1.15896	0.00999783	U133Asc2	serine/arginine repetitive matrix 1	SRRM1	10250
201226_at	0.765328	0.00032878	U133ASc1	NADH dehydrogenase (ubiquinone) 1 beta subcomplex, 8, 19kDa	NDUFB8	4714
201227_s_at	0.972889	0.704723	U133ASc1	NADH dehydrogenase (ubiquinone) 1 beta subcomplex, 8, 19kDa	NDUFB8	4714
201228_s_at	1.0461	0.725155	U133Asc2	ariadne homolog 2 (Drosophila)	ARIH2	10425
201229_s_at	0.914976	0.360021	U133Asc2	ariadne homolog 2 (Drosophila)	ARIH2	10425
201230_s_at	1.3397	0.000151609	U133Asc2	ariadne homolog 2 (Drosophila)	ARIH2	10425
201231_s_at	1.03436	0.710701	U133Asc2	enolase 1, (alpha)	ENO1	2023
201232_s_at	1.00887	0.915245	U133Asc2	proteasome (prosome, macropain) 26S subunit, non-ATPase, 13	PSMD13	5719
201233_at	0.892454	0.00670829	U133Asc2	proteasome (prosome, macropain) 26S subunit, non-ATPase, 13	PSMD13	5719
201235_s_at	1.0188	0.929676	U133Asc2	BTG family, member 2	BTG2	7832
201236_s_at	1.43156	0.0170551	U133ASc1	BTG family, member 2	BTG2	7832
201237_at	0.82376	0.00759574	U133Asc2	capping protein (actin filament) muscle Z-line, alpha 2	CAPZA2	830
201238_s_at	0.843202	0.0375838	U133ASc1	capping protein (actin filament) muscle Z-line, alpha 2	CAPZA2	830
201239_s_at	0.854677	0.0202372	U133Asc2	signal peptidase complex subunit 2 homolog (S. cerevisiae) /// similar to Signal peptidase complex subunit 2 (Microsomal signal peptidase 25 kDa subunit) (SPase 25 kDa subunit)	LOC653566 /// SPCS2	653566 /// 9789
201240_s_at	0.970666	0.587171	U133Asc2	signal peptidase complex subunit 2 homolog (S. cerevisiae)	SPCS2	9789
201241_at	0.939901	0.171486	U133Asc2	DEAD (Asp-Glu-Ala-Asp) box polypeptide 1	DDX1	1653
201242_s_at	1.19878	0.365639	U133ASc1	ATPase, Na+/K+ transporting, beta 1 polypeptide	ATP1B1	481
201243_s_at	0.937027	0.338363	U133ASc1	ATPase, Na+/K+ transporting, beta 1 polypeptide	ATP1B1	481
201244_s_at	0.925731	0.148815	U133Asc2	v-raf-1 murine leukemia viral oncogene homolog 1	RAF1	5894
201245_s_at	0.708672	0.00171921	U133Asc2	OTU domain, ubiquitin aldehyde binding 1	OTUB1	55611
201248_s_at	0.815977	0.180698	U133Asc2	sterol regulatory element binding transcription factor 2	SREBF2	6721
201250_s_at	0.910978	0.0387458	U133Asc2	solute carrier family 2 (facilitated glucose transporter), member 1	SLC2A1	6513
201252_at	0.949378	0.107826	U133Asc2	proteasome (prosome, macropain) 26S subunit, ATPase, 4 /// similar to 26S protease regulatory subunit 6B (MIP224) (MB67-interacting protein) (TAT-binding protein 7) (TBP-7)	LOC652826 /// PSMC4	5704 /// 652826
201253_s_at	1.05374	0.361665	U133Asc2	CDP-diacylglycerol--inositol 3-phosphatidyltransferase (phosphatidylinositol synthase)	CDIPT	10423
201254_x_at	0.964776	0.327837	U133ASc1	ribosomal protein S6	RPS6	6194
201255_x_at	1.00227	0.960104	U133Asc2	HLA-B associated transcript 3	BAT3	7917
201256_at	1.02464	0.671241	U133Asc2	cytochrome c oxidase subunit VIIa polypeptide 2 like	COX7A2L	9167
201258_at	1.03341	0.730411	U133ASc1	ribosomal protein S16	RPS16	6217
201259_s_at	0.752609	0.0912295	U133Asc2	synaptophysin-like 1	SYPL1	6856
201260_s_at	0.99435	0.939664	U133Asc2	synaptophysin-like 1	SYPL1	6856
201261_x_at	0.989534	0.713095	U133Asc2	biglycan	BGN	633
201263_at	1.04371	0.636224	U133Asc2	threonyl-tRNA synthetase	TARS	6897
201265_at	1.03365	0.499758	U133Asc2	---	---	---
201266_at	0.956642	0.511489	U133Asc2	thioredoxin reductase 1	TXNRD1	7296
201267_s_at	0.640172	4.39025e-08	U133Asc2	proteasome (prosome, macropain) 26S subunit, ATPase, 3	PSMC3	5702
201268_at	0.966514	0.688861	U133Asc2	non-metastatic cells 2, protein (NM23B) expressed in /// NM23-LV	NME1-NME2 /// NME2	4831 /// 654364
201270_x_at	1.07289	0.220632	U133Asc2	NudC domain containing 3	NUDCD3	23386
201271_s_at	0.857702	0.00590935	U133Asc2	RNA binding protein, autoantigenic (hnRNP-associated with lethal yellow homolog (mouse))	RALY	22913
201272_at	1.02403	0.505112	U133ASc1	aldo-keto reductase family 1, member B1 (aldose reductase)	AKR1B1	231
201273_s_at	1.14879	0.0320954	U133ASc1	signal recognition particle 9kDa	SRP9	6726
201274_at	0.919225	0.108971	U133Asc2	proteasome (prosome, macropain) subunit, alpha type, 5	PSMA5	5686
201276_at	1.27968	0.04454	U133Asc2	RAB5B, member RAS oncogene family	RAB5B	5869
201277_s_at	0.824092	0.00187299	U133Asc2	heterogeneous nuclear ribonucleoprotein A/B	HNRPAB	3182
201278_at	1.19496	0.353524	U133Asc2	disabled homolog 2, mitogen-responsive phosphoprotein (Drosophila)	DAB2	1601
201280_s_at	0.999617	0.997847	U133Asc2	disabled homolog 2, mitogen-responsive phosphoprotein (Drosophila)	DAB2	1601
201281_at	0.924095	0.203028	U133Asc2	adhesion regulating molecule 1	ADRM1	11047
201282_at	1.29555	0.0278601	U133Asc2	oxoglutarate (alpha-ketoglutarate) dehydrogenase (lipoamide)	OGDH	4967
201284_s_at	0.98257	0.853307	U133Asc2	N-acylaminoacyl-peptide hydrolase	APEH	327
201285_at	0.938102	0.270346	U133Asc2	makorin, ring finger protein, 1	MKRN1	23608
201288_at	0.873132	0.19793	U133Asc2	Rho GDP dissociation inhibitor (GDI) beta	ARHGDIB	397
201290_at	1.08384	0.195525	U133ASc1	SEC11 homolog A (S. cerevisiae)	SEC11A	23478
201293_x_at	1.07472	0.296993	U133ASc1	peptidylprolyl isomerase A (cyclophilin A)	PPIA	5478
201294_s_at	0.992271	0.954725	U133Asc2	WD repeat and SOCS box-containing 1	WSB1	26118
201295_s_at	0.994176	0.985493	U133Asc2	---	---	---
201296_s_at	1.36551	0.00826171	U133Asc2	WD repeat and SOCS box-containing 1	WSB1	26118
201298_s_at	0.860385	0.0352221	U133Asc2	MOB1, Mps One Binder kinase activator-like 1B (yeast)	MOBK1B	55233
201299_s_at	0.955207	0.422001	U133Asc2	MOB1, Mps One Binder kinase activator-like 1B (yeast)	MOBK1B	55233
201300_s_at	1.05866	0.514716	U133Asc2	prion protein (p27-30) (Creutzfeldt-Jakob disease, Gerstmann-Strausler-Scheinker syndrome, fatal familial insomnia)	PRNP	5621
201301_s_at	0.847321	0.272519	U133Asc2	annexin A4	ANXA4	307
201302_at	0.980982	0.887024	U133Asc2	annexin A4	ANXA4	307
201303_at	0.973455	0.448643	U133Asc2	eukaryotic translation initiation factor 4A, isoform 3	EIF4A3	9775
201304_at	0.881326	0.220828	U133Asc2	NADH dehydrogenase (ubiquinone) 1 alpha subcomplex, 5, 13kDa	NDUFA5	4698
201305_x_at	1.16314	0.0204983	U133Asc2	acidic (leucine-rich) nuclear phosphoprotein 32 family, member B	ANP32B	10541
201306_s_at	1.16622	0.0185886	U133Asc2	acidic (leucine-rich) nuclear phosphoprotein 32 family, member B	ANP32B	10541
201307_at	1.09594	0.376757	U133Asc2	septin 11	39336	55752
201309_x_at	0.801629	0.253656	U133Asc2	chromosome 5 open reading frame 13	C5orf13	9315
201310_s_at	1.15967	0.0979175	U133ASc1	chromosome 5 open reading frame 13	C5orf13	9315
201311_s_at	0.99094	0.754688	U133Asc2	SH3 domain binding glutamic acid-rich protein like	SH3BGRL	6451
201312_s_at	1.04366	0.855822	U133Asc2	SH3 domain binding glutamic acid-rich protein like	SH3BGRL	6451
201314_at	0.954404	0.58276	U133ASc1	serine/threonine kinase 25 (STE20 homolog, yeast)	STK25	10494
201315_x_at	1.01642	0.85704	U133Asc2	interferon induced transmembrane protein 2 (1-8D)	IFITM2	10581
201316_at	0.991704	0.890797	U133Asc2	proteasome (prosome, macropain) subunit, alpha type, 2	PSMA2	5683
201317_s_at	0.83135	0.00361851	U133Asc2	proteasome (prosome, macropain) subunit, alpha type, 2	PSMA2	5683
201319_at	1.22838	0.0629957	U133ASc1	myosin regulatory light chain MRCL3 /// similar to myosin regulatory light chain-like	LOC645094 /// LOC649855 /// MRCL3	10627 /// 645094 /// 649855
201320_at	1.00398	0.963192	U133Asc2	SWI/SNF related, matrix associated, actin dependent regulator of chromatin, subfamily c, member 2	SMARCC2	6601
201321_s_at	1.43434	0.0253032	U133Asc2	SWI/SNF related, matrix associated, actin dependent regulator of chromatin, subfamily c, member 2	SMARCC2	6601
201323_at	0.959965	0.544161	U133Asc2	EBNA1 binding protein 2	EBNA1BP2	10969
201324_at	1.25143	0.395617	U133Asc2	epithelial membrane protein 1	EMP1	2012
201326_at	1.12309	0.150003	U133Asc2	chaperonin containing TCP1, subunit 6A (zeta 1)	CCT6A	908
201327_s_at	0.813142	0.00153649	U133Asc2	chaperonin containing TCP1, subunit 6A (zeta 1)	CCT6A	908
201328_at	0.865353	0.180174	U133Asc2	v-ets erythroblastosis virus E26 oncogene homolog 2 (avian)	ETS2	2114
201329_s_at	0.85817	0.212414	U133Asc2	v-ets erythroblastosis virus E26 oncogene homolog 2 (avian)	ETS2	2114
201331_s_at	1.19986	0.248507	U133Asc2	signal transducer and activator of transcription 6, interleukin-4 induced	STAT6	6778
201334_s_at	0.813238	0.0193366	U133ASc1	Rho guanine nucleotide exchange factor (GEF) 12	ARHGEF12	23365
201336_at	1.00128	0.981666	U133Asc2	vesicle-associated membrane protein 3 (cellubrevin)	VAMP3	9341
201337_s_at	0.753177	0.115564	U133Asc2	vesicle-associated membrane protein 3 (cellubrevin)	VAMP3	9341
201338_x_at	0.886039	0.0122514	U133ASc1	general transcription factor IIIA	GTF3A	2971
201339_s_at	0.758286	0.000695063	U133Asc2	sterol carrier protein 2	SCP2	6342
201342_at	1.03107	0.579745	U133Asc2	small nuclear ribonucleoprotein polypeptide C	SNRPC	6631
201343_at	0.978782	0.815463	U133Asc2	ubiquitin-conjugating enzyme E2D 2 (UBC4/5 homolog, yeast)	UBE2D2	7322
201344_at	0.874001	0.0499705	U133Asc2	ubiquitin-conjugating enzyme E2D 2 (UBC4/5 homolog, yeast)	UBE2D2	7322
201345_s_at	0.845129	0.00305894	U133Asc2	ubiquitin-conjugating enzyme E2D 2 (UBC4/5 homolog, yeast)	UBE2D2	7322
201346_at	1.199	0.0489001	U133Asc2	adiponectin receptor 2	ADIPOR2	79602
201347_x_at	0.89083	0.105364	U133Asc2	glyoxylate reductase/hydroxypyruvate reductase	GRHPR	9380
201348_at	0.983782	0.870006	U133Asc2	glutathione peroxidase 3 (plasma)	GPX3	2878
201350_at	0.975999	0.486216	U133Asc2	flotillin 2	FLOT2	2319
201351_s_at	0.959106	0.608891	U133Asc2	YME1-like 1 (S. cerevisiae)	YME1L1	10730
201352_at	0.977167	0.649015	U133Asc2	YME1-like 1 (S. cerevisiae)	YME1L1	10730
201353_s_at	0.97484	0.672966	U133Asc2	bromodomain adjacent to zinc finger domain, 2A	BAZ2A	11176
201356_at	1.13802	0.0411215	U133Asc2	splicing factor 3a, subunit 1, 120kDa	SF3A1	10291
201357_s_at	1.1005	0.0945897	U133Asc2	splicing factor 3a, subunit 1, 120kDa	SF3A1	10291
201358_s_at	0.940583	0.188505	U133Asc2	coatomer protein complex, subunit beta 1	COPB1	1315
201359_at	0.887515	0.173939	U133Asc2	coatomer protein complex, subunit beta 1	COPB1	1315
201360_at	0.908215	0.382124	U133ASc1	cystatin C (amyloid angiopathy and cerebral hemorrhage)	CST3	1471
201361_at	0.952861	0.433178	U133Asc2	transmembrane protein 109	TMEM109	79073
201362_at	0.875552	0.275572	U133Asc2	influenza virus NS1A binding protein	IVNS1ABP	10625
201363_s_at	0.847314	0.143532	U133Asc2	influenza virus NS1A binding protein	IVNS1ABP	10625
201364_s_at	0.889818	0.311908	U133Asc2	ornithine decarboxylase antizyme 2	OAZ2	4947
201365_at	1.10348	0.212172	U133Asc2	ornithine decarboxylase antizyme 2	OAZ2	4947
201366_at	0.900052	0.0550343	U133ASc1	annexin A7	ANXA7	310
201368_at	1.0825	0.341108	U133Asc2	zinc finger protein 36, C3H type-like 2	ZFP36L2	678
201370_s_at	0.933074	0.302198	U133Asc2	cullin 3	CUL3	8452
201371_s_at	0.925702	0.107702	U133Asc2	cullin 3	CUL3	8452
201373_at	1.01402	0.862191	U133ASc1	plectin 1, intermediate filament binding protein 500kDa	PLEC1	5339
201375_s_at	0.967419	0.588384	U133Asc2	protein phosphatase 2 (formerly 2A), catalytic subunit, beta isoform	PPP2CB	5516
201377_at	0.895716	0.0418527	U133Asc2	ubiquitin associated protein 2-like	UBAP2L	9898
201378_s_at	1.01499	0.831795	U133Asc2	ubiquitin associated protein 2-like	UBAP2L	9898
201379_s_at	0.777529	3.52853e-06	U133Asc2	tumor protein D52-like 2	TPD52L2	7165
201380_at	0.827265	0.0651402	U133Asc2	cartilage associated protein	CRTAP	10491
201381_x_at	0.982058	0.798807	U133Asc2	calcyclin binding protein	CACYBP	27101
201382_at	0.937834	0.57824	U133Asc2	calcyclin binding protein	CACYBP	27101
201383_s_at	0.675616	0.0072006	U133Asc2	neighbor of BRCA1 gene 1 /// similar to neighbor of BRCA1 gene 1	LOC727732 /// NBR1	4077 /// 727732
201384_s_at	0.99083	0.871372	U133Asc2	neighbor of BRCA1 gene 1 /// similar to neighbor of BRCA1 gene 1	LOC727732 /// NBR1	4077 /// 727732
201385_at	1.06208	0.164596	U133Asc2	DEAH (Asp-Glu-Ala-His) box polypeptide 15	DHX15	1665
201386_s_at	0.942315	0.450968	U133Asc2	DEAH (Asp-Glu-Ala-His) box polypeptide 15	DHX15	1665
201388_at	0.942447	0.511007	U133Asc2	proteasome (prosome, macropain) 26S subunit, non-ATPase, 3	PSMD3	5709
201390_s_at	0.892722	0.00142214	U133Asc2	casein kinase 2, beta polypeptide	CSNK2B	1460
201391_at	1.12749	0.0608686	U133Asc2	TNF receptor-associated protein 1	TRAP1	10131
201392_s_at	1.12959	0.504227	U133Asc2	insulin-like growth factor 2 receptor	IGF2R	3482
201393_s_at	1.12303	0.260432	U133Asc2	insulin-like growth factor 2 receptor	IGF2R	3482
201394_s_at	1.14884	0.0754826	U133Asc2	RNA binding motif protein 5	RBM5	10181
201395_at	1.19474	0.0287108	U133Asc2	RNA binding motif protein 5	RBM5	10181
201396_s_at	0.99629	0.908981	U133Asc2	small glutamine-rich tetratricopeptide repeat (TPR)-containing, alpha	SGTA	6449
201398_s_at	1.05202	0.565439	U133Asc2	translocation associated membrane protein 1	TRAM1	23471
201399_s_at	0.630909	0.00894008	U133Asc2	translocation associated membrane protein 1	TRAM1	23471
201400_at	0.775213	0.00014617	U133Asc2	proteasome (prosome, macropain) subunit, beta type, 3	PSMB3	5691
201403_s_at	0.916791	0.0895316	U133ASc1	microsomal glutathione S-transferase 3	MGST3	4259
201404_x_at	1.03852	0.626774	U133Asc2	proteasome (prosome, macropain) subunit, beta type, 2	PSMB2	5690
201405_s_at	0.823777	1.8253e-05	U133Asc2	COP9 constitutive photomorphogenic homolog subunit 6 (Arabidopsis)	COPS6	10980
201406_at	0.875672	0.0125196	U133ASc1	ribosomal protein L36a /// similar to large subunit ribosomal protein L36a	LOC729362 /// RPL36A	6173 /// 729362
201407_s_at	1.04546	0.654126	U133ASc1	protein phosphatase 1, catalytic subunit, beta isoform	PPP1CB	5500
201408_at	0.766844	0.000963862	U133Asc2	protein phosphatase 1, catalytic subunit, beta isoform	PPP1CB	5500
201409_s_at	0.862564	0.0619011	U133Asc2	protein phosphatase 1, catalytic subunit, beta isoform	PPP1CB	5500
201410_at	0.833587	0.0491698	U133Asc2	CDNA FLJ23679 fis, clone HEP09084	---	0
201412_at	1.00306	0.965079	U133Asc2	low density lipoprotein receptor-related protein 10	LRP10	26020
201413_at	0.841847	0.0297472	U133Asc2	hydroxysteroid (17-beta) dehydrogenase 4	HSD17B4	3295
201414_s_at	1.1331	0.0495226	U133Asc2	nucleosome assembly protein 1-like 4	NAP1L4	4676
201417_at	0.757685	0.257951	U133Asc2	SRY (sex determining region Y)-box 4	SOX4	6659
201421_s_at	0.903605	0.018561	U133Asc2	WD repeat domain 77	WDR77	79084
201422_at	1.0119	0.900476	U133Asc2	interferon, gamma-inducible protein 30	IFI30	10437
201423_s_at	0.915636	0.141168	U133Asc2	cullin 4A	CUL4A	8451
201424_s_at	0.954819	0.660913	U133Asc2	cullin 4A	CUL4A	8451
201425_at	1.31486	0.000231977	U133ASc1	aldehyde dehydrogenase 2 family (mitochondrial)	ALDH2	217
201426_s_at	1.00796	0.959663	U133ASc1	vimentin	VIM	7431
201427_s_at	1.0483	0.437024	U133ASc1	selenoprotein P, plasma, 1	SEPP1	6414
201430_s_at	2.64313	0.274286	U133Asc2	dihydropyrimidinase-like 3	DPYSL3	1809
201431_s_at	1.7085	0.000912668	U133Asc2	dihydropyrimidinase-like 3	DPYSL3	1809
201432_at	1.26435	0.0119438	U133Asc2	catalase	CAT	847
201433_s_at	1.08045	0.158666	U133Asc2	phosphatidylserine synthase 1	PTDSS1	9791
201435_s_at	0.550773	3.45827e-07	U133Asc2	eukaryotic translation initiation factor 4E	EIF4E	1977
201436_at	0.799484	0.00382739	U133Asc2	eukaryotic translation initiation factor 4E	EIF4E	1977
201437_s_at	0.845926	0.041038	U133Asc2	eukaryotic translation initiation factor 4E	EIF4E	1977
201438_at	1.1124	0.440013	U133Asc2	collagen, type VI, alpha 3	COL6A3	1293
201439_at	1.49189	5.24877e-05	U133Asc2	golgi-specific brefeldin A resistance factor 1	GBF1	8729
201441_at	0.971648	0.598859	U133ASc1	cytochrome c oxidase subunit Vib polypeptide 1 (ubiquitous)	COX6B1	1340
201443_s_at	1.21178	0.0994768	U133Asc2	ATPase, H+ transporting, lysosomal accessory protein 2	ATP6AP2	10159
201444_s_at	0.7786	0.0030612	U133Asc2	ATPase, H+ transporting, lysosomal accessory protein 2	ATP6AP2	10159
201445_at	0.841555	0.276379	U133Asc2	calponin 3, acidic	CNN3	1266
201446_s_at	1.07506	0.491254	U133Asc2	TIA1 cytotoxic granule-associated RNA binding protein	TIA1	7072
201447_at	0.847301	0.075648	U133Asc2	TIA1 cytotoxic granule-associated RNA binding protein	TIA1	7072
201448_at	0.915018	0.433222	U133Asc2	TIA1 cytotoxic granule-associated RNA binding protein	TIA1	7072
201449_at	0.952445	0.534706	U133Asc2	TIA1 cytotoxic granule-associated RNA binding protein	TIA1	7072
201450_s_at	1.27835	0.389822	U133Asc2	TIA1 cytotoxic granule-associated RNA binding protein	TIA1	7072
201453_x_at	0.999649	0.99475	U133ASc1	Ras homolog enriched in brain	RHEB	6009
201454_s_at	1.0147	0.791192	U133Asc2	aminopeptidase puromycin sensitive	NPEPPS	9520
201455_s_at	1.10025	0.310668	U133Asc2	aminopeptidase puromycin sensitive	NPEPPS	9520
201456_s_at	0.664609	0.0100975	U133Asc2	BUB3 budding uninhibited by benzimidazoles 3 homolog (yeast)	BUB3	9184
201457_x_at	0.748384	0.00370189	U133Asc2	BUB3 budding uninhibited by benzimidazoles 3 homolog (yeast)	BUB3	9184
201458_s_at	0.966681	0.570836	U133Asc2	BUB3 budding uninhibited by benzimidazoles 3 homolog (yeast)	BUB3	9184
201460_at	1.16745	0.0140053	U133ASc1	mitogen-activated protein kinase-activated protein kinase 2	MAPKAPK2	9261
201461_s_at	0.697709	0.05079	U133Asc2	mitogen-activated protein kinase-activated protein kinase 2	MAPKAPK2	9261
201463_s_at	1.16242	0.0650993	U133Asc2	transaldolase 1	TALDO1	6888
201464_x_at	0.938896	0.310035	U133Asc2	jun oncogene	JUN	3725
201466_s_at	1.0236	0.841792	U133Asc2	jun oncogene	JUN	3725
201468_s_at	1.05045	0.609624	U133Asc2	NAD(P)H dehydrogenase, quinone 1	NQO1	1728
201469_s_at	1.03344	0.668796	U133Asc2	SHC (Src homology 2 domain containing) transforming protein 1	SHC1	6464
201470_at	0.992067	0.918576	U133Asc2	glutathione S-transferase omega 1	GSTO1	9446
201471_s_at	0.931647	0.374065	U133ASc1	sequestosome 1	SQSTM1	8878
201472_at	0.977462	0.632985	U133ASc1	von Hippel-Lindau binding protein 1	VBP1	7411
201475_x_at	0.923834	0.113	U133Asc2	methionyl-tRNA synthetase	MARS	4141
201476_s_at	1.14113	0.400931	U133Asc2	ribonucleotide reductase M1 polypeptide	RRM1	6240
201477_s_at	1.60164	0.000233224	U133Asc2	ribonucleotide reductase M1 polypeptide	RRM1	6240
201478_s_at	1.01308	0.870556	U133Asc2	dyskeratosis congenita 1, dyskerin	DKC1	1736
201479_at	1.09526	0.22606	U133Asc2	dyskeratosis congenita 1, dyskerin	DKC1	1736
201480_s_at	1.04047	0.334797	U133Asc2	suppressor of Ty 5 homolog (S. cerevisiae)	SUPT5H	6829
201484_at	0.830299	0.00864394	U133Asc2	suppressor of Ty 4 homolog 1 (S. cerevisiae)	SUPT4H1	6827
201486_at	1.03694	0.655083	U133Asc2	reticulocalbin 2, EF-hand calcium binding domain	RCN2	5955
201488_x_at	1.19023	0.023565	U133Asc2	KH domain containing, RNA binding, signal transduction associated 1	KHDRBS1	10657
201489_at	1.11486	0.277995	U133Asc2	peptidylprolyl isomerase F (cyclophilin F)	PPIF	10105
201490_s_at	0.875776	0.385668	U133Asc2	peptidylprolyl isomerase F (cyclophilin F)	PPIF	10105
201491_at	1.02762	0.58635	U133Asc2	AHA1, activator of heat shock 90kDa protein ATPase homolog 1 (yeast)	AHSA1	10598
201493_s_at	1.04235	0.549496	U133Asc2	pumilio homolog 2 (Drosophila)	PUM2	23369
201497_x_at	1.26288	0.266893	U133Asc2	myosin, heavy chain 11, smooth muscle	MYH11	4629
201498_at	1.10417	0.209158	U133Asc2	ubiquitin specific peptidase 7 (herpes virus-associated)	USP7	7874
201499_s_at	0.923786	0.221335	U133Asc2	ubiquitin specific peptidase 7 (herpes virus-associated)	USP7	7874
201500_s_at	0.890539	0.0353517	U133Asc2	protein phosphatase 1, regulatory (inhibitor) subunit 11	PPP1R11	6992
201501_s_at	0.888296	0.15161	U133Asc2	G-rich RNA sequence binding factor 1	GRSF1	2926
201502_s_at	2.00719	8.56535e-05	U133ASc1	nuclear factor of kappa light polypeptide gene enhancer in B-cells inhibitor, alpha	NFKBIA	4792
201503_at	0.956516	0.459172	U133Asc2	GTPase activating protein (SH3 domain) binding protein 1	G3BP1	10146
201505_at	1.66065	0.23143	U133Asc2	laminin, beta 1	LAMB1	3912
201506_at	0.979422	0.83847	U133Asc2	transforming growth factor, beta-induced, 68kDa	TGFBI	7045
201507_at	0.947346	0.342111	U133Asc2	prefoldin subunit 1	PFDN1	5201
201508_at	1.51496	0.0128964	U133Asc2	insulin-like growth factor binding protein 4	IGFBP4	3487
201511_at	0.872876	0.0810965	U133Asc2	angio-associated, migratory cell protein	AAMP	14
201512_s_at	0.909323	0.476086	U133Asc2	translocase of outer mitochondrial membrane 70 homolog A (S. cerevisiae)	TOMM70A	9868
201513_at	0.924952	0.370174	U133Asc2	translin	TSN	7247
201515_s_at	0.969039	0.590574	U133Asc2	translin	TSN	7247
201516_at	0.941202	0.465857	U133Asc2	spermidine synthase	SRM	6723
201517_at	0.952987	0.438333	U133Asc2	nuclear cap binding protein subunit 2, 20kDa	NCBP2	22916
201518_at	1.06599	0.246936	U133Asc2	chromobox homolog 1 (HP1 beta homolog Drosophila )	CBX1	10951
201519_at	1.14688	0.00408577	U133Asc2	translocase of outer mitochondrial membrane 70 homolog A (S. cerevisiae)	TOMM70A	9868
201520_s_at	0.797865	0.000928776	U133Asc2	G-rich RNA sequence binding factor 1	GRSF1	2926
201522_x_at	0.72194	1.69655e-05	U133ASc1	small nuclear ribonucleoprotein polypeptide N /// SNRPN upstream reading frame	SNRPN /// SNURF	6638 /// 8926
201523_x_at	0.795807	0.0138608	U133Asc2	ubiquitin-conjugating enzyme E2N (UBC13 homolog, yeast)	UBE2N	7334
201524_x_at	0.921964	0.0515026	U133Asc2	ubiquitin-conjugating enzyme E2N (UBC13 homolog, yeast)	UBE2N	7334
201525_at	0.783329	0.230901	U133ASc1	apolipoprotein D	APOD	347
201526_at	0.753686	0.000388012	U133Asc2	ADP-ribosylation factor 5	ARF5	381
201527_at	0.850944	0.00682695	U133ASc1	ATPase, H+ transporting, lysosomal 14kDa, V1 subunit F	ATP6V1F	9296
201528_at	0.898246	0.333912	U133Asc2	replication protein A1, 70kDa	RPA1	6117
201529_s_at	0.7673	0.0339903	U133Asc2	replication protein A1, 70kDa	RPA1	6117
201530_x_at	1.04241	0.472348	U133Asc2	eukaryotic translation initiation factor 4A, isoform 1	EIF4A1	1973
201531_at	1.16659	0.122853	U133Asc2	zinc finger protein 36, C3H type, homolog (mouse)	ZFP36	7538
201532_at	0.893018	0.120875	U133Asc2	proteasome (prosome, macropain) subunit, alpha type, 3	PSMA3	5684
201533_at	0.775196	0.00206124	U133Asc2	catenin (cadherin-associated protein), beta 1, 88kDa	CTNNB1	1499
201534_s_at	0.746727	0.00565461	U133Asc2	ubiquitin-like 3	UBL3	5412
201535_at	0.999488	0.992286	U133Asc2	ubiquitin-like 3	UBL3	5412
201536_at	0.980905	0.821602	U133ASc1	dual specificity phosphatase 3 (vaccinia virus phosphatase VH1-related)	DUSP3	1845
201537_s_at	0.77993	0.201489	U133Asc2	dual specificity phosphatase 3 (vaccinia virus phosphatase VH1-related)	DUSP3	1845
201538_s_at	0.726233	0.0447123	U133Asc2	dual specificity phosphatase 3 (vaccinia virus phosphatase VH1-related)	DUSP3	1845
201541_s_at	0.881048	0.0109888	U133Asc2	zinc finger, HIT type 1	ZNHIT1	10467
201542_at	0.925353	0.276299	U133Asc2	SAR1 gene homolog A (S. cerevisiae)	SAR1A	56681
201543_s_at	0.948344	0.479317	U133Asc2	SAR1 gene homolog A (S. cerevisiae)	SAR1A	56681
201544_x_at	1.19801	0.037858	U133Asc2	poly(A) binding protein, nuclear 1	PABPN1	8106
201545_s_at	0.997528	0.985787	U133Asc2	poly(A) binding protein, nuclear 1	PABPN1	8106
201546_at	0.940847	0.256392	U133Asc2	thyroid hormone receptor interactor 12	TRIP12	9320
201549_x_at	1.009	0.529639	U133Asc2	jumonji, AT rich interactive domain 1B	JARID1B	10765
201550_x_at	1.15164	0.215315	U133ASc1	actin, gamma 1	ACTG1	71
201551_s_at	0.757763	0.00758717	U133Asc2	lysosomal-associated membrane protein 1	LAMP1	3916
201552_at	0.849162	0.0124036	U133Asc2	lysosomal-associated membrane protein 1	LAMP1	3916
201553_s_at	1.23014	0.0100579	U133Asc2	lysosomal-associated membrane protein 1	LAMP1	3916
201554_x_at	0.766433	0.000490686	U133ASc1	glycogenin 1	GYG1	2992
201555_at	0.832767	0.0199102	U133Asc2	minichromosome maintenance complex component 3	MCM3	4172
201556_s_at	1.47916	0.00134919	U133Asc2	vesicle-associated membrane protein 2 (synaptobrevin 2)	VAMP2	6844
201557_at	1.25561	0.0193053	U133Asc2	vesicle-associated membrane protein 2 (synaptobrevin 2)	VAMP2	6844
201558_at	1.08199	0.382988	U133Asc2	RAE1 RNA export 1 homolog (S. pombe)	RAE1	8480
201559_s_at	0.812932	0.146346	U133Asc2	chloride intracellular channel 4	CLIC4	25932
201560_at	0.796796	0.135313	U133Asc2	chloride intracellular channel 4	CLIC4	25932
201561_s_at	0.968392	0.636396	U133Asc2	calsyntenin 1	CLSTN1	22883
201563_at	1.08486	0.514356	U133Asc2	sorbitol dehydrogenase	SORD	6652
201567_s_at	0.859995	0.00304684	U133Asc2	golgi autoantigen, golgin subfamily a, 4	GOLGA4	2803
201568_at	1.02407	0.572382	U133ASc1	ubiquinol-cytochrome c reductase, complex III subunit VII, 9.5kDa	UQCRQ	27089
201569_s_at	0.940743	0.5626	U133Asc2	sorting and assembly machinery component 50 homolog (S. cerevisiae)	SAMM50	25813
201570_at	0.829744	0.000382302	U133ASc1	sorting and assembly machinery component 50 homolog (S. cerevisiae)	SAMM50	25813
201572_x_at	0.725883	0.000625662	U133Asc2	dCMP deaminase	DCTD	1635
201573_s_at	0.811861	0.0109279	U133Asc2	eukaryotic translation termination factor 1	ETF1	2107
201574_at	0.952534	0.499668	U133Asc2	eukaryotic translation termination factor 1	ETF1	2107
201575_at	1.04513	0.499193	U133Asc2	SNW domain containing 1	SNW1	22938
201577_at	0.866635	0.100444	U133Asc2	non-metastatic cells 1, protein (NM23A) expressed in	NME1	4830
201578_at	1.13151	0.236014	U133Asc2	podocalyxin-like	PODXL	5420
201579_at	0.9774	0.880717	U133Asc2	FAT tumor suppressor homolog 1 (Drosophila)	FAT	2195
201580_s_at	0.714307	0.0147909	U133Asc2	thioredoxin domain containing 13	TXNDC13	56255
201581_at	0.906057	0.174815	U133Asc2	thioredoxin domain containing 13	TXNDC13	56255
201583_s_at	0.859675	0.0249701	U133Asc2	Sec23 homolog B (S. cerevisiae)	SEC23B	10483
201584_s_at	0.926382	0.617664	U133Asc2	DEAD (Asp-Glu-Ala-Asp) box polypeptide 39	DDX39	10212
201585_s_at	0.714671	0.000412505	U133Asc2	splicing factor proline/glutamine-rich (polypyrimidine tract binding protein associated)	SFPQ	6421
201586_s_at	0.861747	0.0529257	U133Asc2	splicing factor proline/glutamine-rich (polypyrimidine tract binding protein associated)	SFPQ	6421
201587_s_at	0.951809	0.483581	U133Asc2	interleukin-1 receptor-associated kinase 1	IRAK1	3654
201588_at	1.01441	0.746411	U133Asc2	thioredoxin-like 1	TXNL1	9352
201589_at	1.55008	0.00518119	U133Asc2	structural maintenance of chromosomes 1A	SMC1A	8243
201590_x_at	1.0018	0.98351	U133Asc2	annexin A2	ANXA2	302
201591_s_at	1.39217	2.99645e-05	U133Asc2	nischarin	NISCH	11188
201592_at	1.04926	0.372054	U133ASc1	eukaryotic translation initiation factor 3, subunit 3 gamma, 40kDa	EIF3S3	8667
201593_s_at	1.11433	0.152437	U133Asc2	zinc finger CCCH-type containing 15	ZC3H15	55854
201594_s_at	0.986228	0.760284	U133Asc2	protein phosphatase 4, regulatory subunit 1	PPP4R1	9989
201595_s_at	0.915529	0.238497	U133Asc2	zinc finger CCCH-type containing 15	ZC3H15	55854
201597_at	0.92251	0.356887	U133ASc1	cytochrome c oxidase subunit VIIa polypeptide 2 (liver)	COX7A2	1347
201598_s_at	1.15749	0.0616075	U133Asc2	inositol polyphosphate phosphatase-like 1	INPPL1	3636
201599_at	0.804927	0.0073527	U133Asc2	ornithine aminotransferase (gyrate atrophy)	OAT	4942
201600_at	0.932163	0.108966	U133ASc1	prohibitin 2	PHB2	11331
201601_x_at	1.00006	0.999611	U133Asc2	interferon induced transmembrane protein 1 (9-27)	IFITM1	8519
201602_s_at	1.17236	0.298383	U133Asc2	protein phosphatase 1, regulatory (inhibitor) subunit 12A	PPP1R12A	4659
201603_at	1.23024	0.0842899	U133Asc2	protein phosphatase 1, regulatory (inhibitor) subunit 12A	PPP1R12A	4659
201604_s_at	0.847672	0.222115	U133Asc2	protein phosphatase 1, regulatory (inhibitor) subunit 12A	PPP1R12A	4659
201606_s_at	1.22547	0.0744733	U133Asc2	PWP1 homolog (S. cerevisiae)	PWP1	11137
201608_s_at	1.1646	0.055132	U133Asc2	PWP1 homolog (S. cerevisiae)	PWP1	11137
201609_x_at	0.860845	0.120814	U133Asc2	isoprenylcysteine carboxyl methyltransferase	ICMT	23463
201611_s_at	0.837433	0.237929	U133Asc2	isoprenylcysteine carboxyl methyltransferase	ICMT	23463
201612_at	1.41715	1.76518e-06	U133Asc2	aldehyde dehydrogenase 9 family, member A1	ALDH9A1	223
201617_x_at	1.08003	0.842778	U133Asc2	caldesmon 1	CALD1	800
201618_x_at	0.880212	0.167221	U133Asc2	glycosylphosphatidylinositol anchor attachment protein 1 homolog (yeast)	GPAA1	8733
201619_at	0.993516	0.931256	U133ASc1	peroxiredoxin 3	PRDX3	10935
201623_s_at	1.13266	0.178791	U133Asc2	aspartyl-tRNA synthetase	DARS	1615
201624_at	1.17986	0.0982161	U133Asc2	aspartyl-tRNA synthetase	DARS	1615
201626_at	0.801526	0.0482011	U133Asc2	insulin induced gene 1	INSIG1	3638
201627_s_at	0.896359	0.0526393	U133Asc2	insulin induced gene 1	INSIG1	3638
201628_s_at	0.978338	0.697964	U133Asc2	Ras-related GTP binding A	RRAGA	10670
201630_s_at	0.943095	0.300096	U133Asc2	acid phosphatase 1, soluble	ACP1	52
201631_s_at	3.63514	0.0134194	U133Asc2	immediate early response 3	IER3	8870
201632_at	0.915271	0.0045615	U133Asc2	eukaryotic translation initiation factor 2B, subunit 1 alpha, 26kDa	EIF2B1	1967
201633_s_at	0.699686	7.48341e-05	U133Asc2	cytochrome b5 type B (outer mitochondrial membrane)	CYB5B	80777
201634_s_at	0.678964	0.000202969	U133Asc2	cytochrome b5 type B (outer mitochondrial membrane)	CYB5B	80777
201635_s_at	0.76519	0.128534	U133ASc1	fragile X mental retardation, autosomal homolog 1	FXR1	8087
201636_at	0.929419	0.154488	U133ASc1	fragile X mental retardation, autosomal homolog 1	FXR1	8087
201637_s_at	0.85078	0.0131654	U133ASc1	fragile X mental retardation, autosomal homolog 1	FXR1	8087
201640_x_at	0.992769	0.850276	U133Asc2	cleft lip and palate associated transmembrane protein 1	CLPTM1	1209
201642_at	0.946134	0.375595	U133Asc2	interferon gamma receptor 2 (interferon gamma transducer 1)	IFNGR2	3460
201643_x_at	0.870042	0.0385285	U133Asc2	jumonji domain containing 1B	JMJD1B	51780
201646_at	0.600078	0.00609056	U133Asc2	scavenger receptor class B, member 2	SCARB2	950
201647_s_at	0.99725	0.989411	U133Asc2	scavenger receptor class B, member 2	SCARB2	950
201648_at	0.859165	0.0193916	U133Asc2	Janus kinase 1 (a protein tyrosine kinase)	JAK1	3716
201649_at	0.910832	0.599246	U133Asc2	ubiquitin-conjugating enzyme E2L 6	UBE2L6	9246
201651_s_at	1.15074	0.0375469	U133Asc2	protein kinase C and casein kinase substrate in neurons 2	PACSIN2	11252
201652_at	0.908314	0.222703	U133Asc2	COP9 constitutive photomorphogenic homolog subunit 5 (Arabidopsis)	COPS5	10987
201653_at	0.885979	0.24261	U133Asc2	cornichon homolog (Drosophila)	CNIH	10175
201655_s_at	1.235	0.109019	U133Asc2	heparan sulfate proteoglycan 2	HSPG2	3339
201656_at	1.20879	0.208544	U133Asc2	integrin, alpha 6	ITGA6	3655
201657_at	0.787871	0.365634	U133Asc2	ADP-ribosylation factor-like 1	ARL1	400
201658_at	1.06016	0.231969	U133Asc2	ADP-ribosylation factor-like 1	ARL1	400
201659_s_at	0.896847	0.213814	U133Asc2	ADP-ribosylation factor-like 1	ARL1	400
201660_at	1.13586	0.0325768	U133Asc2	Full-length cDNA clone CS0DF008YJ12 of Fetal brain of Homo sapiens (human) /// Acyl-CoA synthetase long-chain family member 3	ACSL3	0 /// 2181
201661_s_at	1.63212	0.0046465	U133Asc2	acyl-CoA synthetase long-chain family member 3	ACSL3	2181
201662_s_at	0.90658	0.599743	U133Asc2	acyl-CoA synthetase long-chain family member 3	ACSL3	2181
201664_at	1.15838	0.161541	U133Asc2	structural maintenance of chromosomes 4	SMC4	10051
201665_x_at	1.06143	0.255585	U133ASc1	ribosomal protein S17	RPS17	6218
201666_at	1.00018	0.99898	U133Asc2	TIMP metallopeptidase inhibitor 1	TIMP1	7076
201667_at	1.34039	0.0393931	U133Asc2	gap junction protein, alpha 1, 43kDa	GJA1	2697
201669_s_at	1.20618	0.322393	U133Asc2	myristoylated alanine-rich protein kinase C substrate	MARCKS	4082
201671_x_at	1.51473	0.0255034	U133Asc2	ubiquitin specific peptidase 14 (tRNA-guanine transglycosylase)	USP14	9097
201672_s_at	1.06097	0.391394	U133Asc2	ubiquitin specific peptidase 14 (tRNA-guanine transglycosylase)	USP14	9097
201673_s_at	1.10413	0.291106	U133ASc1	glycogen synthase 1 (muscle)	GYS1	2997
201674_s_at	1.3478	0.0168869	U133ASc1	A kinase (PRKA) anchor protein 1	AKAP1	8165
201675_at	1.21919	0.0122643	U133ASc1	A kinase (PRKA) anchor protein 1	AKAP1	8165
201676_x_at	1.02626	0.67774	U133Asc2	proteasome (prosome, macropain) subunit, alpha type, 1	PSMA1	5682
201677_at	1.04772	0.394211	U133Asc2	Chromosome 3 open reading frame 37	C3orf37	56941
201678_s_at	0.916226	0.267345	U133Asc2	chromosome 3 open reading frame 37	C3orf37	56941
201680_x_at	1.10497	0.235649	U133Asc2	ARS2 protein	ARS2	51593
201681_s_at	0.794082	0.0429628	U133Asc2	discs, large homolog 5 (Drosophila)	DLG5	9231
201682_at	0.777599	4.1549e-05	U133Asc2	peptidase (mitochondrial processing) beta	PMPCB	9512
201683_x_at	0.854965	0.200074	U133Asc2	TOX high mobility group box family member 4	TOX4	9878
201684_s_at	1.06834	0.232629	U133Asc2	TOX high mobility group box family member 4	TOX4	9878
201685_s_at	0.773584	0.00132258	U133Asc2	TOX high mobility group box family member 4	TOX4	9878
201686_x_at	0.915479	0.218246	U133Asc2	apoptosis inhibitor 5	API5	8539
201687_s_at	0.958189	0.466519	U133Asc2	apoptosis inhibitor 5	API5	8539
201688_s_at	0.235205	0.000301627	U133Asc2	tumor protein D52	TPD52	7163
201689_s_at	0.434861	3.24374e-05	U133Asc2	tumor protein D52	TPD52	7163
201690_s_at	0.621334	0.00346219	U133Asc2	tumor protein D52	TPD52	7163
201692_at	0.878388	0.0373031	U133Asc2	opioid receptor, sigma 1	OPRS1	10280
201694_s_at	0.931098	0.795744	U133Asc2	early growth response 1	EGR1	1958
201695_s_at	1.053	0.551889	U133Asc2	nucleoside phosphorylase	NP	4860
201696_at	1.12049	0.0770294	U133Asc2	splicing factor, arginine/serine-rich 4	SFRS4	6429
201698_s_at	0.785158	5.23068e-05	U133Asc2	splicing factor, arginine/serine-rich 9	SFRS9	8683
201699_at	0.905297	0.216027	U133Asc2	proteasome (prosome, macropain) 26S subunit, ATPase, 6	PSMC6	5706
201701_s_at	0.965729	0.748401	U133Asc2	progesterone receptor membrane component 2	PGRMC2	10424
201705_at	1.04916	0.322572	U133Asc2	proteasome (prosome, macropain) 26S subunit, non-ATPase, 7 (Mov34 homolog)	PSMD7	5713
201706_s_at	0.929583	0.0815023	U133Asc2	peroxisomal biogenesis factor 19	PEX19	5824
201709_s_at	1.09625	0.0654286	U133Asc2	nipsnap homolog 1 (C. elegans)	NIPSNAP1	8508
201711_x_at	0.938971	0.768679	U133Asc2	RAN binding protein 2	RANBP2	5903
201712_s_at	0.863261	0.045754	U133Asc2	RAN binding protein 2	RANBP2	5903
201713_s_at	0.970162	0.674208	U133Asc2	RAN binding protein 2	RANBP2	5903
201714_at	0.876427	0.14811	U133Asc2	tubulin, gamma 1	TUBG1	7283
201715_s_at	0.94501	0.262185	U133Asc2	apoptotic chromatin condensation inducer 1	ACIN1	22985
201716_at	1.05704	0.360324	U133Asc2	sorting nexin 1	SNX1	6642
201717_at	0.875182	0.010239	U133Asc2	mitochondrial ribosomal protein L49	MRPL49	740
201719_s_at	1.32431	0.0228973	U133Asc2	erythrocyte membrane protein band 4.1-like 2	EPB41L2	2037
201721_s_at	0.71287	0.0333125	U133Asc2	lysosomal associated multispanning membrane protein 5	LAPTM5	7805
201722_s_at	1.1997	0.101563	U133Asc2	UDP-N-acetyl-alpha-D-galactosamine:polypeptide N-acetylgalactosaminyltransferase 1 (GalNAc-T1)	GALNT1	2589
201723_s_at	0.983291	0.87721	U133Asc2	UDP-N-acetyl-alpha-D-galactosamine:polypeptide N-acetylgalactosaminyltransferase 1 (GalNAc-T1)	GALNT1	2589
201724_s_at	1.16303	0.179074	U133Asc2	UDP-N-acetyl-alpha-D-galactosamine:polypeptide N-acetylgalactosaminyltransferase 1 (GalNAc-T1)	GALNT1	2589
201725_at	0.93483	0.229545	U133Asc2	cell division cycle 123 homolog (S. cerevisiae)	CDC123	8872
201726_at	1.0679	0.39093	U133Asc2	ELAV (embryonic lethal, abnormal vision, Drosophila)-like 1 (Hu antigen R)	ELAVL1	1994
201729_s_at	0.844431	0.00755219	U133Asc2	KIAA0100	KIAA0100	9703
201730_s_at	0.992962	0.950789	U133Asc2	translocated promoter region (to activated MET oncogene)	TPR	7175
201731_s_at	0.963634	0.236437	U133Asc2	translocated promoter region (to activated MET oncogene)	TPR	7175
201733_at	0.989973	0.948739	U133Asc2	chloride channel 3	CLCN3	1182
201734_at	1.08516	0.310863	U133Asc2	Chloride channel 3	CLCN3	1182
201735_s_at	1.01287	0.905802	U133Asc2	chloride channel 3	CLCN3	1182
201736_s_at	1.8192	0.0285881	U133Asc2	membrane-associated ring finger (C3HC4) 6	39147	10299
201737_s_at	1.25021	0.257131	U133Asc2	membrane-associated ring finger (C3HC4) 6	39147	10299
201738_at	0.921184	0.284151	U133Asc2	eukaryotic translation initiation factor 1B	EIF1B	10289
201739_at	0.791102	0.196726	U133Asc2	serum/glucocorticoid regulated kinase	SGK	6446
201740_at	0.771236	6.61936e-05	U133ASc1	NADH dehydrogenase (ubiquinone) Fe-S protein 3, 30kDa (NADH-coenzyme Q reductase)	NDUFS3	4722
201742_x_at	0.66587	0.00510691	U133Asc2	splicing factor, arginine/serine-rich 1 (splicing factor 2, alternate splicing factor)	SFRS1	6426
201744_s_at	1.26176	0.389736	U133Asc2	lumican	LUM	4060
201745_at	0.926901	0.360252	U133Asc2	twinfilin, actin-binding protein, homolog 1 (Drosophila)	TWF1	5756
201747_s_at	0.792764	0.00505727	U133Asc2	scaffold attachment factor B	SAFB	6294
201748_s_at	0.842395	0.00954443	U133Asc2	scaffold attachment factor B	SAFB	6294
201749_at	0.950532	0.116385	U133Asc2	Endothelin converting enzyme 1	ECE1	1889
201752_s_at	1.48894	0.00574982	U133Asc2	adducin 3 (gamma)	ADD3	120
201753_s_at	1.26757	0.180055	U133Asc2	adducin 3 (gamma)	ADD3	120
201754_at	1.02777	0.460697	U133ASc1	cytochrome c oxidase subunit VIc	COX6C	1345
201756_at	0.97731	0.819911	U133Asc2	replication protein A2, 32kDa	RPA2	6118
201757_at	0.970381	0.464864	U133ASc1	NADH dehydrogenase (ubiquinone) Fe-S protein 5, 15kDa (NADH-coenzyme Q reductase)	NDUFS5	4725
201758_at	0.934922	0.260771	U133Asc2	tumor susceptibility gene 101	TSG101	7251
201760_s_at	1.07765	0.196163	U133Asc2	WD repeat and SOCS box-containing 2	WSB2	55884
201761_at	0.820623	0.219806	U133Asc2	methylenetetrahydrofolate dehydrogenase (NADP+ dependent) 2, methenyltetrahydrofolate cyclohydrolase	MTHFD2	10797
201762_s_at	0.848744	0.139423	U133Asc2	proteasome (prosome, macropain) activator subunit 2 (PA28 beta)	PSME2	5721
201768_s_at	0.59553	0.000346016	U133Asc2	clathrin interactor 1	CLINT1	9685
201769_at	0.883735	0.0563474	U133ASc1	clathrin interactor 1	CLINT1	9685
201771_at	0.905951	0.107936	U133Asc2	secretory carrier membrane protein 3	SCAMP3	10067
201772_at	0.850538	0.283467	U133Asc2	antizyme inhibitor 1	AZIN1	51582
201773_at	0.9515	0.549134	U133Asc2	activity-dependent neuroprotector	ADNP	23394
201774_s_at	1.0305	0.338491	U133Asc2	non-SMC condensin I complex, subunit D2	NCAPD2	9918
201775_s_at	0.843859	0.025314	U133Asc2	KIAA0494	KIAA0494	9813
201776_s_at	0.709318	0.154056	U133Asc2	KIAA0494	KIAA0494	9813
201778_s_at	1.04992	0.39476	U133ASc1	KIAA0494	KIAA0494	9813
201779_s_at	1.09611	0.383152	U133Asc2	ring finger protein 13	RNF13	11342
201780_s_at	1.08558	0.279384	U133Asc2	ring finger protein 13	RNF13	11342
201781_s_at	0.937309	0.0902148	U133Asc2	aryl hydrocarbon receptor interacting protein	AIP	9049
201782_s_at	0.935873	0.205355	U133Asc2	aryl hydrocarbon receptor interacting protein	AIP	9049
201783_s_at	0.962102	0.324612	U133Asc2	v-rel reticuloendotheliosis viral oncogene homolog A, nuclear factor of kappa light polypeptide gene enhancer in B-cells 3, p65 (avian)	RELA	5970
201784_s_at	0.760442	0.00245989	U133Asc2	chromosome 11 open reading frame 58	C11orf58	10944
201785_at	0.766083	0.00428554	U133Asc2	ribonuclease, RNase A family, 1 (pancreatic)	RNASE1	6035
201786_s_at	1.11106	0.176841	U133Asc2	adenosine deaminase, RNA-specific	ADAR	103
201788_at	1.0829	0.180933	U133Asc2	DEAD (Asp-Glu-Ala-Asp) box polypeptide 42	DDX42	11325
201791_s_at	0.723344	0.00111292	U133Asc2	7-dehydrocholesterol reductase	DHCR7	1717
201794_s_at	1.08134	0.367624	U133Asc2	Smg-7 homolog, nonsense mediated mRNA decay factor (C. elegans)	SMG7	9887
201795_at	1.35496	0.023889	U133Asc2	lamin B receptor	LBR	3930
201797_s_at	0.956365	0.683096	U133Asc2	valyl-tRNA synthetase	VARS	7407
201798_s_at	0.776762	0.220063	U133Asc2	fer-1-like 3, myoferlin (C. elegans)	FER1L3	26509
201799_s_at	0.783127	0.02372	U133Asc2	oxysterol binding protein	OSBP	5007
201800_s_at	0.912033	0.1277	U133Asc2	oxysterol binding protein	OSBP	5007
201801_s_at	1.12308	0.365057	U133Asc2	solute carrier family 29 (nucleoside transporters), member 1	SLC29A1	2030
201802_at	1.44408	0.00086808	U133Asc2	solute carrier family 29 (nucleoside transporters), member 1	SLC29A1	2030
201803_at	0.924681	0.0924056	U133Asc2	polymerase (RNA) II (DNA directed) polypeptide B, 140kDa	POLR2B	5431
201804_x_at	0.814295	0.0276651	U133Asc2	tubulin folding cofactor B	TBCB	1155
201805_at	0.806661	0.00898328	U133Asc2	protein kinase, AMP-activated, gamma 1 non-catalytic subunit	PRKAG1	5571
201807_at	0.997911	0.955467	U133Asc2	vacuolar protein sorting 26 homolog A (S. pombe)	VPS26A	9559
201810_s_at	1.42017	0.118177	U133Asc2	SH3-domain binding protein 5 (BTK-associated)	SH3BP5	9467
201811_x_at	1.11269	0.630709	U133Asc2	SH3-domain binding protein 5 (BTK-associated)	SH3BP5	9467
201812_s_at	1.10161	0.0370417	U133ASc1	translocase of outer mitochondrial membrane 7 homolog (yeast) /// hypothetical protein LOC201725	LOC201725 /// TOMM7	201725 /// 54543
201816_s_at	1.01761	0.798853	U133ASc1	glioblastoma amplified sequence	GBAS	2631
201817_at	0.920337	0.25232	U133Asc2	ubiquitin protein ligase E3C	UBE3C	9690
201819_at	1.29785	0.00253516	U133Asc2	scavenger receptor class B, member 1	SCARB1	949
201821_s_at	0.831897	0.010269	U133Asc2	translocase of inner mitochondrial membrane 17 homolog A (yeast)	TIMM17A	10440
201823_s_at	0.746621	0.10187	U133Asc2	ring finger protein 14	RNF14	9604
201824_at	0.9236	0.437718	U133Asc2	ring finger protein 14	RNF14	9604
201825_s_at	0.899262	0.167652	U133Asc2	saccharopine dehydrogenase (putative)	SCCPDH	51097
201826_s_at	0.932954	0.48132	U133Asc2	saccharopine dehydrogenase (putative)	SCCPDH	51097
201827_at	1.03409	0.723847	U133Asc2	SWI/SNF related, matrix associated, actin dependent regulator of chromatin, subfamily d, member 2	SMARCD2	6603
201828_x_at	1.10198	0.183622	U133Asc2	family with sequence similarity 127, member A	FAM127A	8933
201829_at	0.944965	0.517052	U133Asc2	neuroepithelial cell transforming gene 1	NET1	10276
201830_s_at	0.634351	0.00134434	U133Asc2	neuroepithelial cell transforming gene 1	NET1	10276
201831_s_at	1.04783	0.706406	U133Asc2	vesicle docking protein p115	VDP	8615
201832_s_at	0.954864	0.510344	U133ASc1	vesicle docking protein p115	VDP	8615
201833_at	1.02404	0.61888	U133Asc2	histone deacetylase 2	HDAC2	3066
201836_s_at	0.931631	0.645656	U133Asc2	suppressor of Ty 7 (S. cerevisiae)-like	SUPT7L	9913
201837_s_at	0.799577	0.00947	U133Asc2	suppressor of Ty 7 (S. cerevisiae)-like	SUPT7L	9913
201840_at	0.922699	0.0867362	U133Asc2	neural precursor cell expressed, developmentally down-regulated 8	NEDD8	4738
201841_s_at	1.11849	0.277496	U133ASc1	heat shock 27kDa protein 1	HSPB1	3315
201842_s_at	0.719553	0.421093	U133Asc2	EGF-containing fibulin-like extracellular matrix protein 1	EFEMP1	2202
201843_s_at	0.675369	0.358568	U133Asc2	EGF-containing fibulin-like extracellular matrix protein 1	EFEMP1	2202
201844_s_at	0.840875	0.00451991	U133Asc2	RING1 and YY1 binding protein	RYBP	23429
201845_s_at	0.896962	0.264747	U133Asc2	RING1 and YY1 binding protein	RYBP	23429
201846_s_at	1.31797	0.00807174	U133Asc2	RING1 and YY1 binding protein	RYBP	23429
201847_at	0.965303	0.747411	U133Asc2	lipase A, lysosomal acid, cholesterol esterase (Wolman disease)	LIPA	3988
201848_s_at	0.965477	0.760073	U133Asc2	BCL2/adenovirus E1B 19kDa interacting protein 3	BNIP3	664
201849_at	1.18714	0.017376	U133Asc2	BCL2/adenovirus E1B 19kDa interacting protein 3	BNIP3	664
201852_x_at	1.68939	0.0723267	U133Asc2	collagen, type III, alpha 1 (Ehlers-Danlos syndrome type IV, autosomal dominant)	COL3A1	1281
201853_s_at	0.924364	0.517276	U133Asc2	cell division cycle 25 homolog B (S. pombe)	CDC25B	994
201854_s_at	0.978786	0.751836	U133Asc2	ATM/ATR-Substrate Chk2-Interacting Zn2+-finger protein	ASCIZ	23300
201855_s_at	0.950002	0.642221	U133Asc2	ATM/ATR-Substrate Chk2-Interacting Zn2+-finger protein	ASCIZ	23300
201856_s_at	0.63048	0.00156048	U133Asc2	zinc finger RNA binding protein	ZFR	51663
201857_at	1.0331	0.656557	U133Asc2	zinc finger RNA binding protein	ZFR	51663
201859_at	0.902796	0.274576	U133Asc2	serglycin	SRGN	5552
201860_s_at	1.23232	0.282958	U133Asc2	plasminogen activator, tissue	PLAT	5327
201861_s_at	0.99764	0.97059	U133Asc2	leucine rich repeat (in FLII) interacting protein 1	LRRFIP1	9208
201862_s_at	1.52147	0.0507665	U133Asc2	leucine rich repeat (in FLII) interacting protein 1	LRRFIP1	9208
201863_at	1.06416	0.357275	U133Asc2	family with sequence similarity 32, member A	FAM32A	26017
201864_at	1.26793	0.000867336	U133Asc2	GDP dissociation inhibitor 1	GDI1	2664
201865_x_at	1.51814	0.0231477	U133ASc1	nuclear receptor subfamily 3, group C, member 1 (glucocorticoid receptor)	NR3C1	2908
201866_s_at	0.91774	0.525227	U133Asc2	nuclear receptor subfamily 3, group C, member 1 (glucocorticoid receptor)	NR3C1	2908
201870_at	1.03176	0.609178	U133Asc2	translocase of outer mitochondrial membrane 34	TOMM34	10953
201871_s_at	0.81062	0.009595	U133Asc2	SAPK substrate protein 1	LOC51035	51035
201872_s_at	1.09184	0.297091	U133Asc2	ATP-binding cassette, sub-family E (OABP), member 1	ABCE1	6059
201873_s_at	0.912919	0.54262	U133Asc2	ATP-binding cassette, sub-family E (OABP), member 1	ABCE1	6059
201874_at	0.988113	0.865991	U133Asc2	myelin protein zero-like 1	MPZL1	9019
201875_s_at	0.898343	0.0379252	U133Asc2	myelin protein zero-like 1	MPZL1	9019
201876_at	0.976914	0.857655	U133Asc2	paraoxonase 2	PON2	5445
201877_s_at	1.12655	0.142802	U133Asc2	protein phosphatase 2, regulatory subunit B', gamma isoform	PPP2R5C	5527
201878_at	0.912206	0.317172	U133Asc2	ariadne homolog, ubiquitin-conjugating enzyme E2 binding protein, 1 (Drosophila)	ARIH1	25820
201879_at	0.79157	0.0826571	U133Asc2	ariadne homolog, ubiquitin-conjugating enzyme E2 binding protein, 1 (Drosophila)	ARIH1	25820
201880_at	0.984489	0.833327	U133Asc2	Ariadne homolog, ubiquitin-conjugating enzyme E2 binding protein, 1 (Drosophila)	ARIH1	25820
201881_s_at	0.715898	0.0539344	U133Asc2	ariadne homolog, ubiquitin-conjugating enzyme E2 binding protein, 1 (Drosophila)	ARIH1	25820
201883_s_at	0.756365	0.00554743	U133Asc2	UDP-Gal:betaGlcNAc beta 1,4- galactosyltransferase, polypeptide 1	B4GALT1	2683
201884_at	1.08347	0.550578	U133Asc2	carcinoembryonic antigen-related cell adhesion molecule 5	CEACAM5	1048
201885_s_at	1.12839	0.026389	U133Asc2	cytochrome b5 reductase 3	CYB5R3	1727
201886_at	0.982938	0.783714	U133Asc2	WD repeat domain 23	WDR23	80344
201887_at	1.14617	0.206086	U133Asc2	interleukin 13 receptor, alpha 1	IL13RA1	3597
201889_at	0.933859	0.49344	U133Asc2	family with sequence similarity 3, member C	FAM3C	10447
201891_s_at	0.945626	0.592178	U133ASc1	beta-2-microglobulin	B2M	567
201892_s_at	0.941155	0.338991	U133Asc2	IMP (inosine monophosphate) dehydrogenase 2	IMPDH2	3615
201893_x_at	0.872638	0.23916	U133ASc1	decorin	DCN	1634
201894_s_at	0.898233	0.100929	U133Asc2	signal sequence receptor, alpha (translocon-associated protein alpha)	SSR1	6745
201895_at	0.823741	0.00111411	U133Asc2	v-raf murine sarcoma 3611 viral oncogene homolog	ARAF	369
201897_s_at	1.2313	0.0134229	U133Asc2	CDC28 protein kinase regulatory subunit 1B	CKS1B	1163
201898_s_at	0.838174	0.011498	U133Asc2	ubiquitin-conjugating enzyme E2A (RAD6 homolog)	UBE2A	7319
201899_s_at	0.986642	0.799885	U133Asc2	ubiquitin-conjugating enzyme E2A (RAD6 homolog)	UBE2A	7319
201900_s_at	1.13004	0.283274	U133Asc2	aldo-keto reductase family 1, member A1 (aldehyde reductase)	AKR1A1	10327
201901_s_at	1.13947	0.204411	U133Asc2	YY1 transcription factor	YY1	7528
201903_at	0.967618	0.597201	U133ASc1	ubiquinol-cytochrome c reductase core protein I	UQCRC1	7384
201906_s_at	1.05624	0.456144	U133Asc2	CTD (carboxy-terminal domain, RNA polymerase II, polypeptide A) small phosphatase-like	CTDSPL	10217
201908_at	0.854211	0.0366154	U133Asc2	dishevelled, dsh homolog 3 (Drosophila)	DVL3	1857
201909_at	0.00677186	3.0789e-23	U133ASc1	ribosomal protein S4, Y-linked 1	RPS4Y1	6192
201911_s_at	0.815421	0.193539	U133Asc2	FERM, RhoGEF (ARHGEF) and pleckstrin domain protein 1 (chondrocyte-derived)	FARP1	10160
201912_s_at	0.8127	0.00954583	U133Asc2	G1 to S phase transition 1	GSPT1	2935
201913_s_at	0.940645	0.0800145	U133Asc2	Coenzyme A synthase	COASY	80347
201914_s_at	0.977173	0.515845	U133Asc2	SEC63 homolog (S. cerevisiae)	SEC63	11231
201916_s_at	0.871953	0.179816	U133Asc2	SEC63 homolog (S. cerevisiae)	SEC63	11231
201917_s_at	1.41227	0.110095	U133Asc2	solute carrier family 25, member 36	SLC25A36	55186
201918_at	1.06737	0.658804	U133Asc2	Solute carrier family 25, member 36	SLC25A36	55186
201919_at	0.880179	0.0241954	U133Asc2	Solute carrier family 25, member 36	SLC25A36	55186
201920_at	1.01218	0.909927	U133Asc2	solute carrier family 20 (phosphate transporter), member 1	SLC20A1	6574
201921_at	1.0653	0.529976	U133Asc2	guanine nucleotide binding protein (G protein), gamma 10 /// hypothetical protein LOC552891	GNG10 /// LOC552891	2790 /// 552891
201922_at	0.853797	0.0268496	U133Asc2	TGF beta-inducible nuclear protein 1	TINP1	10412
201923_at	0.773215	0.000714421	U133Asc2	peroxiredoxin 4	PRDX4	10549
201924_at	0.926805	0.367863	U133ASc1	AF4/FMR2 family, member 1	AFF1	4299
201925_s_at	0.89216	0.331838	U133Asc2	CD55 molecule, decay accelerating factor for complement (Cromer blood group)	CD55	1604
201926_s_at	0.66141	0.00164476	U133Asc2	CD55 molecule, decay accelerating factor for complement (Cromer blood group)	CD55	1604
201928_at	1.16017	0.305596	U133Asc2	plakophilin 4	PKP4	8502
201929_s_at	0.933296	0.60633	U133Asc2	plakophilin 4	PKP4	8502
201930_at	1.01034	0.770292	U133Asc2	minichromosome maintenance complex component 6	MCM6	4175
201931_at	1.116	0.151982	U133Asc2	electron-transfer-flavoprotein, alpha polypeptide (glutaric aciduria II)	ETFA	2108
201933_at	1.05431	0.608175	U133Asc2	chromatin modifying protein 1A	CHMP1A	5119
201934_at	1.02705	0.537819	U133Asc2	transmembrane protein 113	TMEM113	80335
201935_s_at	0.759319	0.0214875	U133Asc2	eukaryotic translation initiation factor 4 gamma, 3	EIF4G3	8672
201936_s_at	0.933465	0.362795	U133Asc2	eukaryotic translation initiation factor 4 gamma, 3	EIF4G3	8672
201938_at	1.06611	0.497242	U133Asc2	CDK2-associated protein 1	CDK2AP1	8099
201939_at	0.931724	0.448021	U133Asc2	polo-like kinase 2 (Drosophila)	PLK2	10769
201940_at	1.05222	0.728558	U133Asc2	carboxypeptidase D	CPD	1362
201941_at	0.874428	0.349855	U133Asc2	carboxypeptidase D	CPD	1362
201944_at	0.984565	0.832604	U133Asc2	hexosaminidase B (beta polypeptide)	HEXB	3074
201946_s_at	0.712632	0.00992306	U133Asc2	chaperonin containing TCP1, subunit 2 (beta)	CCT2	10576
201947_s_at	1.06276	0.278932	U133Asc2	chaperonin containing TCP1, subunit 2 (beta)	CCT2	10576
201948_at	0.97277	0.743501	U133Asc2	guanine nucleotide binding protein-like 2 (nucleolar)	GNL2	29889
201949_x_at	1.554	2.73827e-06	U133Asc2	capping protein (actin filament) muscle Z-line, beta	CAPZB	832
201950_x_at	1.33095	0.0258042	U133Asc2	capping protein (actin filament) muscle Z-line, beta	CAPZB	832
201953_at	1.00304	0.968084	U133Asc2	calcium and integrin binding 1 (calmyrin)	CIB1	10519
201954_at	0.982388	0.870372	U133Asc2	actin related protein 2/3 complex, subunit 1B, 41kDa /// similar to Actin-related protein 2/3 complex subunit 1B (ARP2/3 complex 41 kDa subunit) (p41-ARC)	ARPC1B /// LOC653888	10095 /// 653888
201955_at	0.971401	0.775196	U133Asc2	cyclin C	CCNC	892
201956_s_at	1.00329	0.937081	U133Asc2	glyceronephosphate O-acyltransferase	GNPAT	8443
201957_at	0.960241	0.604015	U133Asc2	protein phosphatase 1, regulatory (inhibitor) subunit 12B	PPP1R12B	4660
201959_s_at	1.28299	0.02478	U133Asc2	MYC binding protein 2	MYCBP2	23077
201960_s_at	1.25105	0.0672296	U133Asc2	MYC binding protein 2	MYCBP2	23077
201962_s_at	0.82751	0.0455194	U133Asc2	ring finger protein 41	RNF41	10193
201963_at	1.09856	0.371768	U133ASc1	acyl-CoA synthetase long-chain family member 1	ACSL1	2180
201964_at	0.921781	0.0372753	U133Asc2	senataxin	SETX	23064
201966_at	0.863412	0.017603	U133ASc1	NADH dehydrogenase (ubiquinone) Fe-S protein 2, 49kDa (NADH-coenzyme Q reductase)	NDUFS2	4720
201967_at	1.20235	0.0490473	U133Asc2	RNA binding motif protein 6	RBM6	10180
201969_at	0.991192	0.937204	U133Asc2	nuclear autoantigenic sperm protein (histone-binding)	NASP	4678
201972_at	1.22539	0.00726788	U133Asc2	ATPase, H+ transporting, lysosomal 70kDa, V1 subunit A	ATP6V1A	523
201973_s_at	0.824705	0.000520186	U133Asc2	chromosome 7 open reading frame 28A	C7orf28A	51622
201974_s_at	0.972967	0.618164	U133Asc2	chromosome 7 open reading frame 28A /// chromosome 7 open reading frame 28B /// similar to CG14980-PB	C7orf28A /// C7orf28B /// LOC652200	221960 /// 51622 /// 652200
201975_at	0.893951	0.175481	U133Asc2	CAP-GLY domain containing linker protein 1	CLIP1	6249
201976_s_at	1.00199	0.983063	U133Asc2	myosin X	MYO10	4651
201977_s_at	0.658626	0.000105043	U133Asc2	KIAA0141	KIAA0141	9812
201980_s_at	1.29233	0.141426	U133Asc2	Ras suppressor protein 1	RSU1	6251
201983_s_at	1.04804	0.76644	U133Asc2	epidermal growth factor receptor (erythroblastic leukemia viral (v-erb-b) oncogene homolog, avian)	EGFR	1956
201984_s_at	0.926368	0.216011	U133Asc2	epidermal growth factor receptor (erythroblastic leukemia viral (v-erb-b) oncogene homolog, avian)	EGFR	1956
201985_at	1.16135	0.00494804	U133Asc2	KIAA0196	KIAA0196	9897
201986_at	1.0875	0.61987	U133Asc2	thyroid hormone receptor associated protein 1	THRAP1	9969
201987_at	1.14962	0.0361352	U133Asc2	thyroid hormone receptor associated protein 1	THRAP1	9969
201988_s_at	0.845695	0.0173562	U133Asc2	cAMP responsive element binding protein-like 2	CREBL2	1389
201989_s_at	1.05219	0.396242	U133Asc2	cAMP responsive element binding protein-like 2	CREBL2	1389
201990_s_at	0.771839	0.0668401	U133Asc2	cAMP responsive element binding protein-like 2	CREBL2	1389
201991_s_at	0.966426	0.721734	U133ASc1	kinesin family member 5B	KIF5B	3799
201992_s_at	0.708772	0.0543716	U133Asc2	kinesin family member 5B	KIF5B	3799
201993_x_at	0.946374	0.405764	U133ASc1	heterogeneous nuclear ribonucleoprotein D-like	HNRPDL	9987
201994_at	1.05267	0.17204	U133ASc1	mortality factor 4 like 2	MORF4L2	9643
201995_at	1.0128	0.862037	U133Asc2	exostoses (multiple) 1	EXT1	2131
201996_s_at	1.43877	0.307549	U133Asc2	spen homolog, transcriptional regulator (Drosophila)	SPEN	23013
201997_s_at	1.02148	0.732095	U133Asc2	spen homolog, transcriptional regulator (Drosophila)	SPEN	23013
201998_at	1.03406	0.685539	U133Asc2	ST6 beta-galactosamide alpha-2,6-sialyltranferase 1	ST6GAL1	6480
201999_s_at	0.963598	0.469751	U133Asc2	dynein, light chain, Tctex-type 1	DYNLT1	6993
202000_at	0.837824	0.0494959	U133Asc2	NADH dehydrogenase (ubiquinone) 1 alpha subcomplex, 6, 14kDa	NDUFA6	4700
202001_s_at	0.925784	0.209161	U133ASc1	NADH dehydrogenase (ubiquinone) 1 alpha subcomplex, 6, 14kDa	NDUFA6	4700
202003_s_at	0.997795	0.975194	U133Asc2	acetyl-Coenzyme A acyltransferase 2 (mitochondrial 3-oxoacyl-Coenzyme A thiolase)	ACAA2	10449
202004_x_at	1.12287	0.0636324	U133Asc2	succinate dehydrogenase complex, subunit C, integral membrane protein, 15kDa /// hCG1776980	hCG_1776980 /// SDHC	6391 /// 642502
202006_at	0.968445	0.80188	U133Asc2	protein tyrosine phosphatase, non-receptor type 12	PTPN12	5782
202007_at	1.42823	0.302859	U133Asc2	nidogen 1	NID1	4811
202008_s_at	0.845267	0.0675879	U133Asc2	nidogen 1	NID1	4811
202009_at	0.826573	0.0951227	U133Asc2	twinfilin, actin-binding protein, homolog 2 (Drosophila)	TWF2	11344
202010_s_at	0.730749	0.00357635	U133Asc2	zinc finger protein 410	ZNF410	57862
202011_at	0.968142	0.640986	U133Asc2	tight junction protein 1 (zona occludens 1)	TJP1	7082
202015_x_at	0.838417	0.241446	U133Asc2	---	---	---
202016_at	1.08541	0.712998	U133Asc2	mesoderm specific transcript homolog (mouse)	MEST	4232
202017_at	1.36246	0.0379636	U133Asc2	epoxide hydrolase 1, microsomal (xenobiotic)	EPHX1	2052
202019_s_at	0.951724	0.642322	U133Asc2	LanC lantibiotic synthetase component C-like 1 (bacterial)	LANCL1	10314
202020_s_at	1.0075	0.935675	U133Asc2	LanC lantibiotic synthetase component C-like 1 (bacterial)	LANCL1	10314
202021_x_at	0.965856	0.473306	U133ASc1	eukaryotic translation initiation factor 1	EIF1	10209
202024_at	0.966946	0.681295	U133Asc2	arsA arsenite transporter, ATP-binding, homolog 1 (bacterial)	ASNA1	439
202025_x_at	0.943015	0.382451	U133Asc2	acetyl-Coenzyme A acyltransferase 1 (peroxisomal 3-oxoacyl-Coenzyme A thiolase)	ACAA1	30
202026_at	0.914676	0.194706	U133ASc1	succinate dehydrogenase complex, subunit D, integral membrane protein	SDHD	6392
202027_at	1.20444	0.0108843	U133Asc2	chromosome 22 open reading frame 5	C22orf5	25829
202028_s_at	0.942262	0.580522	U133Asc2	ribosomal protein L38	RPL38	6169
202030_at	1.04058	0.655801	U133Asc2	branched chain ketoacid dehydrogenase kinase	BCKDK	10295
202031_s_at	1.15784	0.0467156	U133Asc2	WD repeat domain, phosphoinositide interacting 2	WIPI2	26100
202032_s_at	0.832145	0.00723012	U133Asc2	mannosidase, alpha, class 2A, member 2	MAN2A2	4122
202033_s_at	0.886737	0.308302	U133Asc2	RB1-inducible coiled-coil 1	RB1CC1	9821
202034_x_at	1.05393	0.689826	U133Asc2	RB1-inducible coiled-coil 1	RB1CC1	9821
202035_s_at	0.907241	0.0137545	U133Asc2	secreted frizzled-related protein 1	SFRP1	6422
202037_s_at	0.777693	0.260339	U133Asc2	secreted frizzled-related protein 1	SFRP1	6422
202038_at	0.959996	0.680347	U133Asc2	ubiquitination factor E4A (UFD2 homolog, yeast)	UBE4A	9354
202039_at	1.00246	0.973871	U133ASc1	TGFB1-induced anti-apoptotic factor 1 /// myosin XVIIIA	MYO18A /// TIAF1	399687 /// 9220
202040_s_at	1.24819	0.301437	U133Asc2	jumonji, AT rich interactive domain 1A	JARID1A	5927
202041_s_at	0.952817	0.4626	U133Asc2	fibroblast growth factor (acidic) intracellular binding protein	FIBP	9158
202042_at	0.881548	0.0783263	U133Asc2	histidyl-tRNA synthetase	HARS	3035
202043_s_at	0.905328	0.257709	U133Asc2	spermine synthase	SMS	6611
202045_s_at	1.03596	0.471479	U133Asc2	glucocorticoid receptor DNA binding factor 1	GRLF1	2909
202046_s_at	1.7352	0.00392891	U133Asc2	glucocorticoid receptor DNA binding factor 1	GRLF1	2909
202047_s_at	1.17899	0.000847546	U133Asc2	chromobox homolog 6	CBX6	23466
202049_s_at	0.848121	0.111291	U133Asc2	zinc finger, MYM-type 4	ZMYM4	9202
202050_s_at	0.828808	0.0339794	U133Asc2	zinc finger, MYM-type 4	ZMYM4	9202
202051_s_at	0.955405	0.456126	U133Asc2	zinc finger, MYM-type 4	ZMYM4	9202
202053_s_at	0.916119	0.341646	U133Asc2	aldehyde dehydrogenase 3 family, member A2	ALDH3A2	224
202054_s_at	0.960966	0.427005	U133Asc2	aldehyde dehydrogenase 3 family, member A2	ALDH3A2	224
202055_at	0.831106	0.0177072	U133Asc2	karyopherin alpha 1 (importin alpha 5)	KPNA1	3836
202056_at	0.805237	0.00501809	U133Asc2	karyopherin alpha 1 (importin alpha 5)	KPNA1	3836
202057_at	0.749523	0.00208169	U133Asc2	karyopherin alpha 1 (importin alpha 5)	KPNA1	3836
202058_s_at	0.838697	0.570243	U133Asc2	karyopherin alpha 1 (importin alpha 5)	KPNA1	3836
202059_s_at	0.951011	0.549237	U133Asc2	karyopherin alpha 1 (importin alpha 5)	KPNA1	3836
202060_at	0.86025	0.133053	U133Asc2	Ctr9, Paf1/RNA polymerase II complex component, homolog (S. cerevisiae)	CTR9	9646
202061_s_at	1.00558	0.868851	U133Asc2	sel-1 suppressor of lin-12-like (C. elegans)	SEL1L	6400
202066_at	0.90101	0.313913	U133Asc2	protein tyrosine phosphatase, receptor type, f polypeptide (PTPRF), interacting protein (liprin), alpha 1	PPFIA1	8500
202068_s_at	1.01376	0.383948	U133Asc2	low density lipoprotein receptor (familial hypercholesterolemia)	LDLR	3949
202069_s_at	0.875781	0.306007	U133Asc2	isocitrate dehydrogenase 3 (NAD+) alpha	IDH3A	3419
202070_s_at	0.970131	0.771541	U133Asc2	isocitrate dehydrogenase 3 (NAD+) alpha	IDH3A	3419
202071_at	1.13193	0.090136	U133Asc2	syndecan 4	SDC4	6385
202073_at	1.14475	0.142521	U133ASc1	optineurin	OPTN	10133
202074_s_at	0.952136	0.518216	U133ASc1	optineurin	OPTN	10133
202076_at	1.0219	0.638849	U133Asc2	baculoviral IAP repeat-containing 2	BIRC2	329
202077_at	1.01931	0.679877	U133ASc1	NADH dehydrogenase (ubiquinone) 1, alpha/beta subcomplex, 1, 8kDa	NDUFAB1	4706
202078_at	1.036	0.509008	U133Asc2	COP9 constitutive photomorphogenic homolog subunit 3 (Arabidopsis)	COPS3	8533
202079_s_at	1.1922	0.036056	U133Asc2	trafficking protein, kinesin binding 1	TRAK1	22906
202081_at	0.938834	0.660454	U133Asc2	immediate early response 2	IER2	9592
202082_s_at	1.10645	0.577971	U133Asc2	SEC14-like 1 (S. cerevisiae)	SEC14L1	6397
202084_s_at	1.00497	0.936488	U133Asc2	SEC14-like 1 (S. cerevisiae)	SEC14L1	6397
202085_at	1.40253	0.0494863	U133Asc2	tight junction protein 2 (zona occludens 2)	TJP2	9414
202087_s_at	0.87608	0.0513376	U133Asc2	cathepsin L1	CTSL1	1514
202088_at	1.19262	0.0716936	U133Asc2	solute carrier family 39 (zinc transporter), member 6	SLC39A6	25800
202089_s_at	0.783398	0.0337777	U133Asc2	solute carrier family 39 (zinc transporter), member 6	SLC39A6	25800
202090_s_at	0.980759	0.641903	U133ASc1	ubiquinol-cytochrome c reductase, 6.4kDa subunit /// transmembrane protein 54	TMEM54 /// UQCR	10975 /// 113452
202092_s_at	0.856214	0.0138716	U133Asc2	ADP-ribosylation factor-like 2 binding protein	ARL2BP	23568
202093_s_at	1.01981	0.772433	U133Asc2	Paf1, RNA polymerase II associated factor, homolog (S. cerevisiae)	PAF1	54623
202096_s_at	0.925303	0.219598	U133Asc2	translocator protein (18kDa)	TSPO	706
202097_at	1.00667	0.923131	U133Asc2	nucleoporin 153kDa	NUP153	9972
202100_at	0.935904	0.406251	U133Asc2	v-ral simian leukemia viral oncogene homolog B (ras related; GTP binding protein)	RALB	5899
202101_s_at	0.898131	0.10569	U133Asc2	v-ral simian leukemia viral oncogene homolog B (ras related; GTP binding protein)	RALB	5899
202102_s_at	2.12745	7.04188e-11	U133Asc2	bromodomain containing 4	BRD4	23476
202103_at	0.980265	0.823045	U133Asc2	bromodomain containing 4	BRD4	23476
202104_s_at	1.03707	0.682103	U133Asc2	spastic paraplegia 7 (pure and complicated autosomal recessive)	SPG7	6687
202105_at	0.979986	0.686279	U133Asc2	immunoglobulin (CD79A) binding protein 1	IGBP1	3476
202106_at	1.28902	0.00234734	U133Asc2	golgi autoantigen, golgin subfamily a, 3	GOLGA3	2802
202107_s_at	0.882867	0.150501	U133Asc2	minichromosome maintenance complex component 2	MCM2	4171
202108_at	0.954517	0.419765	U133Asc2	peptidase D	PEPD	5184
202110_at	0.829402	0.00119673	U133ASc1	cytochrome c oxidase subunit VIIb	COX7B	1349
202112_at	1.26881	0.0155193	U133Asc2	von Willebrand factor	VWF	7450
202113_s_at	0.68172	0.000513894	U133Asc2	sorting nexin 2	SNX2	6643
202114_at	0.998702	0.98015	U133Asc2	sorting nexin 2	SNX2	6643
202117_at	0.994608	0.954275	U133Asc2	Rho GTPase activating protein 1	ARHGAP1	392
202118_s_at	1.21618	0.438615	U133Asc2	copine III	CPNE3	8895
202119_s_at	0.935286	0.380228	U133Asc2	copine III	CPNE3	8895
202120_x_at	1.06318	0.206928	U133Asc2	adaptor-related protein complex 2, sigma 1 subunit	AP2S1	1175
202121_s_at	0.936047	0.273039	U133Asc2	chromatin modifying protein 2A	CHMP2A	27243
202122_s_at	1.1785	0.00452669	U133Asc2	mannose-6-phosphate receptor binding protein 1	M6PRBP1	10226
202123_s_at	0.904483	0.20272	U133Asc2	v-abl Abelson murine leukemia viral oncogene homolog 1	ABL1	25
202124_s_at	0.84789	0.115287	U133Asc2	trafficking protein, kinesin binding 2	TRAK2	66008
202125_s_at	0.790201	0.0464453	U133Asc2	trafficking protein, kinesin binding 2	TRAK2	66008
202126_at	0.883944	0.0988929	U133Asc2	PRP4 pre-mRNA processing factor 4 homolog B (yeast)	PRPF4B	8899
202127_at	1.14863	0.272004	U133Asc2	PRP4 pre-mRNA processing factor 4 homolog B (yeast)	PRPF4B	8899
202128_at	0.667162	0.0137491	U133Asc2	KIAA0317	KIAA0317	9870
202130_at	1.07033	0.21686	U133Asc2	RIO kinase 3 (yeast)	RIOK3	8780
202131_s_at	0.854401	0.228751	U133Asc2	RIO kinase 3 (yeast)	RIOK3	8780
202133_at	1.04329	0.691177	U133Asc2	WW domain containing transcription regulator 1	WWTR1	25937
202135_s_at	0.879788	0.010063	U133Asc2	ARP1 actin-related protein 1 homolog B, centractin beta (yeast)	ACTR1B	10120
202136_at	0.903381	0.0862893	U133Asc2	zinc finger, MYND domain containing 11	ZMYND11	10771
202137_s_at	0.745601	0.0667519	U133Asc2	zinc finger, MYND domain containing 11	ZMYND11	10771
202138_x_at	0.739237	4.89899e-05	U133ASc1	JTV1 gene	JTV1	7965
202139_at	0.76207	0.0163715	U133Asc2	aldo-keto reductase family 7, member A2 (aflatoxin aldehyde reductase)	AKR7A2	8574
202140_s_at	0.944087	0.166351	U133Asc2	CDC-like kinase 3	CLK3	1198
202141_s_at	0.888349	0.00608395	U133Asc2	COP9 constitutive photomorphogenic homolog subunit 8 (Arabidopsis)	COPS8	10920
202142_at	0.850651	0.0187767	U133ASc1	COP9 constitutive photomorphogenic homolog subunit 8 (Arabidopsis)	COPS8	10920
202143_s_at	0.650492	0.000149517	U133Asc2	COP9 constitutive photomorphogenic homolog subunit 8 (Arabidopsis)	COPS8	10920
202144_s_at	0.901629	0.0688473	U133ASc1	adenylosuccinate lyase	ADSL	158
202146_at	1.05898	0.656428	U133Asc2	interferon-related developmental regulator 1	IFRD1	3475
202149_at	0.993201	0.972446	U133Asc2	neural precursor cell expressed, developmentally down-regulated 9	NEDD9	4739
202151_s_at	0.803707	6.3033e-06	U133Asc2	UBA domain containing 1	UBAC1	10422
202152_x_at	0.923032	0.107639	U133ASc1	upstream transcription factor 2, c-fos interacting	USF2	7392
202154_x_at	1.09432	0.0779648	U133Asc2	tubulin, beta 3	TUBB3	10381
202155_s_at	1.1141	0.0868613	U133Asc2	nucleoporin 214kDa	NUP214	8021
202156_s_at	1.20668	0.179048	U133Asc2	CUG triplet repeat, RNA binding protein 2	CUGBP2	10659
202157_s_at	1.49467	0.00832256	U133Asc2	CUG triplet repeat, RNA binding protein 2	CUGBP2	10659
202158_s_at	1.4171	0.0077389	U133Asc2	CUG triplet repeat, RNA binding protein 2	CUGBP2	10659
202159_at	0.992718	0.897026	U133Asc2	phenylalanyl-tRNA synthetase, alpha subunit	FARSA	2193
202160_at	1.02154	0.780363	U133Asc2	CREB binding protein (Rubinstein-Taybi syndrome)	CREBBP	1387
202161_at	1.31605	0.0276641	U133Asc2	protein kinase N1	PKN1	5585
202163_s_at	0.835101	0.165533	U133Asc2	CCR4-NOT transcription complex, subunit 8	CNOT8	9337
202164_s_at	0.862731	0.0349566	U133Asc2	CCR4-NOT transcription complex, subunit 8	CNOT8	9337
202165_at	0.899143	0.267365	U133Asc2	protein phosphatase 1, regulatory (inhibitor) subunit 2	PPP1R2	5504
202166_s_at	0.864511	0.252218	U133Asc2	protein phosphatase 1, regulatory (inhibitor) subunit 2	PPP1R2	5504
202167_s_at	0.911358	0.219607	U133Asc2	MMS19-like (MET18 homolog, S. cerevisiae)	MMS19L	64210
202168_at	0.905415	0.275511	U133Asc2	TAF9 RNA polymerase II, TATA box binding protein (TBP)-associated factor, 32kDa	TAF9	6880
202169_s_at	0.971927	0.755917	U133Asc2	aminoadipate-semialdehyde dehydrogenase-phosphopantetheinyl transferase	AASDHPPT	60496
202170_s_at	0.760061	0.133457	U133Asc2	aminoadipate-semialdehyde dehydrogenase-phosphopantetheinyl transferase	AASDHPPT	60496
202171_at	0.970694	0.80837	U133Asc2	vascular endothelial zinc finger 1	VEZF1	7716
202172_at	1.05208	0.400677	U133Asc2	vascular endothelial zinc finger 1	VEZF1	7716
202173_s_at	1.38307	0.053627	U133Asc2	vascular endothelial zinc finger 1	VEZF1	7716
202174_s_at	0.945146	0.341071	U133Asc2	pericentriolar material 1	PCM1	5108
202175_at	0.906008	0.111563	U133Asc2	chondroitin polymerizing factor	CHPF	79586
202177_at	1.12311	0.0986836	U133Asc2	growth arrest-specific 6	GAS6	2621
202181_at	1.1026	0.252829	U133Asc2	KIAA0247	KIAA0247	9766
202182_at	1.02587	0.70357	U133Asc2	GCN5 general control of amino-acid synthesis 5-like 2 (yeast)	GCN5L2	2648
202183_s_at	0.785877	0.000609242	U133Asc2	kinesin family member 22 /// similar to Kinesin-like protein KIF22 (Kinesin-like DNA-binding protein) (Kinesin-like protein 4)	KIF22 /// LOC728037	3835 /// 728037
202184_s_at	1.28489	0.0218978	U133Asc2	nucleoporin 133kDa	NUP133	55746
202185_at	0.996259	0.941938	U133Asc2	procollagen-lysine, 2-oxoglutarate 5-dioxygenase 3	PLOD3	8985
202187_s_at	0.966853	0.567747	U133Asc2	protein phosphatase 2, regulatory subunit B', alpha isoform	PPP2R5A	5525
202189_x_at	1.18155	0.164322	U133Asc2	polypyrimidine tract binding protein 1	PTBP1	5725
202192_s_at	1.15178	0.0679554	U133Asc2	growth arrest-specific 7	GAS7	8522
202194_at	1.03805	0.63146	U133Asc2	transmembrane emp24 protein transport domain containing 5	TMED5	50999
202195_s_at	1.02036	0.877583	U133Asc2	transmembrane emp24 protein transport domain containing 5	TMED5	50999
202197_at	0.966308	0.650921	U133Asc2	myotubularin related protein 3	MTMR3	8897
202198_s_at	0.836047	0.203088	U133Asc2	myotubularin related protein 3	MTMR3	8897
202199_s_at	1.06865	0.279958	U133Asc2	SFRS protein kinase 1	SRPK1	6732
202200_s_at	0.987817	0.875026	U133Asc2	SFRS protein kinase 1	SRPK1	6732
202201_at	0.939385	0.389047	U133Asc2	biliverdin reductase B (flavin reductase (NADPH))	BLVRB	645
202202_s_at	1.82666	0.147824	U133Asc2	laminin, alpha 4	LAMA4	3910
202203_s_at	0.472985	0.0276032	U133Asc2	autocrine motility factor receptor	AMFR	267
202204_s_at	0.693624	0.00224501	U133Asc2	autocrine motility factor receptor	AMFR	267
202205_at	0.909447	0.0253012	U133Asc2	vasodilator-stimulated phosphoprotein	VASP	7408
202209_at	0.943034	0.100185	U133Asc2	LSM3 homolog, U6 small nuclear RNA associated (S. cerevisiae)	LSM3	27258
202211_at	0.908408	0.154245	U133Asc2	ADP-ribosylation factor GTPase activating protein 3	ARFGAP3	26286
202213_s_at	0.636141	0.0354695	U133Asc2	cullin 4B	CUL4B	8450
202215_s_at	1.13139	0.0395748	U133Asc2	nuclear transcription factor Y, gamma	NFYC	4802
202216_x_at	0.706783	0.000330815	U133Asc2	nuclear transcription factor Y, gamma	NFYC	4802
202217_at	0.906316	0.0354654	U133Asc2	chromosome 21 open reading frame 33	C21orf33	8209
202219_at	0.996962	0.973865	U133Asc2	solute carrier family 6 (neurotransmitter transporter, creatine), member 8	SLC6A8	6535
202220_at	1.03111	0.704481	U133Asc2	KIAA0907	KIAA0907	22889
202221_s_at	0.936637	0.506316	U133Asc2	E1A binding protein p300	EP300	2033
202223_at	0.83736	0.061486	U133Asc2	STT3, subunit of the oligosaccharyltransferase complex, homolog A (S. cerevisiae)	STT3A	3703
202224_at	1.32483	0.00948246	U133Asc2	v-crk sarcoma virus CT10 oncogene homolog (avian)	CRK	1398
202225_at	0.976914	0.824795	U133Asc2	CDNA FLJ38130 fis, clone D6OST2000464	---	0
202227_s_at	1.08142	0.239997	U133Asc2	bromodomain containing 8	BRD8	10902
202228_s_at	0.990935	0.906463	U133Asc2	neuroplastin	NPTN	27020
202230_s_at	1.18977	0.0756418	U133Asc2	calcium homeostasis endoplasmic reticulum protein	CHERP	10523
202231_at	0.901129	0.103474	U133Asc2	PCI domain containing 1 (herpesvirus entry mediator)	PCID1	10480
202232_s_at	0.867786	0.0382046	U133Asc2	PCI domain containing 1 (herpesvirus entry mediator)	PCID1	10480
202233_s_at	0.840612	0.00958258	U133ASc1	ubiquinol-cytochrome c reductase hinge protein	UQCRH	7388
202234_s_at	1.95931	0.000282276	U133Asc2	solute carrier family 16, member 1 (monocarboxylic acid transporter 1)	SLC16A1	6566
202235_at	1.1398	0.256482	U133Asc2	solute carrier family 16, member 1 (monocarboxylic acid transporter 1)	SLC16A1	6566
202236_s_at	0.89888	0.276029	U133Asc2	solute carrier family 16, member 1 (monocarboxylic acid transporter 1)	SLC16A1	6566
202237_at	1.64306	0.0137	U133Asc2	nicotinamide N-methyltransferase	NNMT	4837
202238_s_at	1.09827	0.67585	U133Asc2	nicotinamide N-methyltransferase	NNMT	4837
202241_at	1.10876	0.292511	U133Asc2	tribbles homolog 1 (Drosophila)	TRIB1	10221
202242_at	0.969537	0.679763	U133Asc2	tetraspanin 7	TSPAN7	7102
202243_s_at	0.909993	0.015112	U133Asc2	proteasome (prosome, macropain) subunit, beta type, 4	PSMB4	5692
202244_at	0.96308	0.478911	U133Asc2	proteasome (prosome, macropain) subunit, beta type, 4	PSMB4	5692
202245_at	0.967067	0.612821	U133Asc2	lanosterol synthase (2,3-oxidosqualene-lanosterol cyclase)	LSS	4047
202246_s_at	1.01206	0.810646	U133Asc2	cyclin-dependent kinase 4	CDK4	1019
202247_s_at	1.01419	0.71027	U133Asc2	metastasis associated 1	MTA1	9112
202249_s_at	1.11195	0.189375	U133Asc2	WD repeat domain 42A	WDR42A	50717
202250_s_at	0.940286	0.485743	U133Asc2	WD repeat domain 42A	WDR42A	50717
202251_at	1.34092	0.000389225	U133Asc2	PRP3 pre-mRNA processing factor 3 homolog (S. cerevisiae)	PRPF3	9129
202252_at	1.33749	0.00214434	U133Asc2	RAB13, member RAS oncogene family	RAB13	5872
202258_s_at	1.0691	0.157737	U133Asc2	phosphonoformate immuno-associated protein 5	PFAAP5	10443
202259_s_at	0.87867	0.712918	U133Asc2	phosphonoformate immuno-associated protein 5	PFAAP5	10443
202261_at	0.772488	2.5547e-05	U133Asc2	vacuolar protein sorting 72 homolog (S. cerevisiae)	VPS72	6944
202263_at	0.866263	0.0839138	U133ASc1	cytochrome b5 reductase 1	CYB5R1	51706
202264_s_at	0.809388	0.000196319	U133Asc2	translocase of outer mitochondrial membrane 40 homolog (yeast)	TOMM40	10452
202265_at	1.06733	0.346478	U133Asc2	BMI1 polycomb ring finger oncogene	BMI1	648
202266_at	0.933027	0.424421	U133Asc2	TRAF and TNF receptor associated protein	TTRAP	51567
202268_s_at	0.826285	0.00355032	U133Asc2	amyloid beta precursor protein binding protein 1	APPBP1	8883
202271_at	1.04188	0.518972	U133Asc2	F-box protein 28	FBXO28	23219
202272_s_at	0.805989	0.031554	U133Asc2	F-box protein 28	FBXO28	23219
202273_at	1.08185	0.351816	U133Asc2	platelet-derived growth factor receptor, beta polypeptide	PDGFRB	5159
202276_at	0.971642	0.416849	U133Asc2	split hand/foot malformation (ectrodactyly) type 1	SHFM1	7979
202277_at	1.14861	0.198324	U133Asc2	serine palmitoyltransferase, long chain base subunit 1	SPTLC1	10558
202279_at	0.959447	0.662275	U133Asc2	chromosome 14 open reading frame 2	C14orf2	9556
202282_at	0.86496	0.021826	U133Asc2	hydroxysteroid (17-beta) dehydrogenase 10	HSD17B10	3028
202283_at	0.809658	0.00392395	U133ASc1	serpin peptidase inhibitor, clade F (alpha-2 antiplasmin, pigment epithelium derived factor), member 1	SERPINF1	5176
202289_s_at	1.10569	0.198138	U133ASc1	transforming, acidic coiled-coil containing protein 2	TACC2	10579
202290_at	1.13999	0.486984	U133Asc2	PDGFA associated protein 1	PDAP1	11333
202291_s_at	1.12239	0.624422	U133Asc2	matrix Gla protein	MGP	4256
202292_x_at	0.965617	0.544832	U133Asc2	lysophospholipase II /// hCG2003956 /// lysophospholipase II pseudogene 1	hCG_2003956 /// LYPLA2 /// LYPLA2P1	11313 /// 388499 /// 653639
202293_at	0.740756	0.0855063	U133Asc2	stromal antigen 1	STAG1	10274
202294_at	0.983838	0.838236	U133Asc2	stromal antigen 1	STAG1	10274
202295_s_at	1.11385	0.441797	U133Asc2	cathepsin H	CTSH	1512
202296_s_at	0.731563	8.80193e-06	U133Asc2	RER1 retention in endoplasmic reticulum 1 homolog (S. cerevisiae)	RER1	11079
202297_s_at	0.895738	0.147415	U133Asc2	RER1 retention in endoplasmic reticulum 1 homolog (S. cerevisiae)	RER1	11079
202298_at	0.973905	0.616607	U133ASc1	NADH dehydrogenase (ubiquinone) 1 alpha subcomplex, 1, 7.5kDa	NDUFA1	4694
202299_s_at	0.960159	0.475309	U133Asc2	hepatitis B virus x interacting protein	HBXIP	10542
202300_at	0.931254	0.117059	U133Asc2	hepatitis B virus x interacting protein	HBXIP	10542
202301_s_at	0.864975	0.147769	U133Asc2	arginine/serine-rich coiled-coil 2	RSRC2	65117
202302_s_at	0.944327	0.403935	U133Asc2	arginine/serine-rich coiled-coil 2	RSRC2	65117
202303_x_at	0.61177	0.000311742	U133Asc2	SWI/SNF related, matrix associated, actin dependent regulator of chromatin, subfamily a, member 5	SMARCA5	8467
202304_at	1.025	0.827031	U133Asc2	fibronectin type III domain containing 3A	FNDC3A	22862
202305_s_at	1.55008	0.00374336	U133Asc2	fasciculation and elongation protein zeta 2 (zygin II)	FEZ2	9637
202306_at	1.00747	0.883211	U133Asc2	polymerase (RNA) II (DNA directed) polypeptide G	POLR2G	5436
202309_at	0.984539	0.78359	U133Asc2	methylenetetrahydrofolate dehydrogenase (NADP+ dependent) 1, methenyltetrahydrofolate cyclohydrolase, formyltetrahydrofolate synthetase	MTHFD1	4522
202310_s_at	2.19111	0.0327424	U133Asc2	collagen, type I, alpha 1	COL1A1	1277
202311_s_at	0.938303	0.359102	U133Asc2	collagen, type I, alpha 1	COL1A1	1277
202313_at	1.15518	0.00877001	U133Asc2	protein phosphatase 2 (formerly 2A), regulatory subunit B, alpha isoform	PPP2R2A	5520
202317_s_at	0.983546	0.733816	U133Asc2	ubiquitination factor E4B (UFD2 homolog, yeast)	UBE4B	10277
202318_s_at	0.844684	0.0107934	U133Asc2	SUMO1/sentrin specific peptidase 6	SENP6	26054
202319_at	0.884546	0.235991	U133Asc2	SUMO1/sentrin specific peptidase 6	SENP6	26054
202321_at	1.05882	0.612835	U133Asc2	geranylgeranyl diphosphate synthase 1	GGPS1	9453
202322_s_at	0.817024	0.00149264	U133Asc2	geranylgeranyl diphosphate synthase 1	GGPS1	9453
202323_s_at	0.932526	0.660673	U133Asc2	acyl-Coenzyme A binding domain containing 3	ACBD3	64746
202324_s_at	0.995228	0.929077	U133Asc2	acyl-Coenzyme A binding domain containing 3	ACBD3	64746
202325_s_at	1.02035	0.742829	U133ASc1	ATP synthase, H+ transporting, mitochondrial F0 complex, subunit F6	ATP5J	522
202328_s_at	1.22077	0.0270446	U133Asc2	polycystic kidney disease 1 (autosomal dominant)	PKD1	5310
202330_s_at	1.29203	0.0198632	U133Asc2	uracil-DNA glycosylase	UNG	7374
202331_at	1.04489	0.488145	U133Asc2	branched chain keto acid dehydrogenase E1, alpha polypeptide	BCKDHA	593
202333_s_at	0.830188	0.00197333	U133Asc2	ubiquitin-conjugating enzyme E2B (RAD6 homolog)	UBE2B	7320
202334_s_at	1.01675	0.791957	U133Asc2	ubiquitin-conjugating enzyme E2B (RAD6 homolog)	UBE2B	7320
202335_s_at	0.837993	0.0585972	U133Asc2	ubiquitin-conjugating enzyme E2B (RAD6 homolog)	UBE2B	7320
202336_s_at	1.13592	0.156996	U133Asc2	peptidylglycine alpha-amidating monooxygenase	PAM	5066
202337_at	0.871952	0.0255273	U133Asc2	polyamine-modulated factor 1	PMF1	11243
202342_s_at	1.264	0.263847	U133Asc2	tripartite motif-containing 2	TRIM2	23321
202343_x_at	0.812038	0.000282849	U133ASc1	cytochrome c oxidase subunit Vb	COX5B	1329
202344_at	0.924609	0.289553	U133Asc2	heat shock transcription factor 1	HSF1	3297
202345_s_at	1.20867	0.197433	U133Asc2	fatty acid binding protein 5 (psoriasis-associated) /// similar to Fatty acid-binding protein, epidermal (E-FABP) (Psoriasis-associated fatty acid-binding protein homolog) (PA-FABP)	FABP5 /// LOC728641 /// LOC729163 /// LOC731043 /// LOC732031	2171 /// 728641 /// 729163 /// 731043 /// 732031
202346_at	1.03527	0.633797	U133Asc2	huntingtin interacting protein 2	HIP2	3093
202347_s_at	0.918862	0.436931	U133Asc2	huntingtin interacting protein 2	HIP2	3093
202348_s_at	0.783677	0.00880024	U133Asc2	torsin family 1, member A (torsin A)	TOR1A	1861
202350_s_at	2.37701	0.118714	U133Asc2	matrilin 2	MATN2	4147
202351_at	1.02991	0.748809	U133Asc2	integrin, alpha V (vitronectin receptor, alpha polypeptide, antigen CD51)	ITGAV	3685
202352_s_at	0.786614	0.00993675	U133Asc2	proteasome (prosome, macropain) 26S subunit, non-ATPase, 12	PSMD12	5718
202353_s_at	0.898908	0.208534	U133Asc2	proteasome (prosome, macropain) 26S subunit, non-ATPase, 12	PSMD12	5718
202355_s_at	0.881113	0.0440906	U133Asc2	general transcription factor IIF, polypeptide 1, 74kDa	GTF2F1	2962
202356_s_at	1.01751	0.79214	U133Asc2	general transcription factor IIF, polypeptide 1, 74kDa	GTF2F1	2962
202359_s_at	0.943716	0.292472	U133Asc2	sorting nexin 19	SNX19	399979
202360_at	0.946582	0.211979	U133Asc2	mastermind-like 1 (Drosophila)	MAML1	9794
202361_at	1.00839	0.920124	U133Asc2	SEC24 related gene family, member C (S. cerevisiae)	SEC24C	9632
202362_at	0.856693	0.064399	U133Asc2	RAP1A, member of RAS oncogene family	RAP1A	5906
202364_at	1.04706	0.675732	U133Asc2	MAX interactor 1	MXI1	4601
202365_at	1.03896	0.467015	U133Asc2	hypothetical protein MGC5139	MGC5139	84747
202366_at	0.979322	0.808416	U133Asc2	acyl-Coenzyme A dehydrogenase, C-2 to C-3 short chain	ACADS	35
202370_s_at	0.767096	0.000888776	U133Asc2	core-binding factor, beta subunit	CBFB	865
202371_at	1.03593	0.535413	U133Asc2	transcription elongation factor A (SII)-like 4	TCEAL4	79921
202372_at	0.878823	0.075292	U133Asc2	Full-length cDNA clone CS0DC007YG11 of Neuroblastoma Cot 25-normalized of Homo sapiens (human)	---	0
202373_s_at	1.07925	0.333032	U133Asc2	RAB3 GTPase activating protein subunit 2 (non-catalytic)	RAB3GAP2	25782
202375_at	0.841416	0.135904	U133Asc2	SEC24 related gene family, member D (S. cerevisiae)	SEC24D	9871
202377_at	1.26283	0.0187096	U133Asc2	leptin receptor /// leptin receptor overlapping transcript	LEPR /// LEPROT	3953 /// 54741
202378_s_at	1.33571	0.025923	U133Asc2	leptin receptor overlapping transcript	LEPROT	54741
202379_s_at	0.964488	0.814277	U133Asc2	natural killer-tumor recognition sequence	NKTR	4820
202380_s_at	1.08792	0.0696172	U133Asc2	natural killer-tumor recognition sequence	NKTR	4820
202381_at	0.772273	0.0391688	U133Asc2	ADAM metallopeptidase domain 9 (meltrin gamma)	ADAM9	8754
202382_s_at	0.9969	0.950217	U133Asc2	glucosamine-6-phosphate deaminase 1	GNPDA1	10007
202383_at	1.19727	0.00613716	U133Asc2	jumonji, AT rich interactive domain 1C	JARID1C	8242
202386_s_at	1.17263	0.0778369	U133Asc2	KIAA0430	KIAA0430	9665
202387_at	0.941126	0.48589	U133Asc2	BCL2-associated athanogene	BAG1	573
202391_at	1.09441	0.0280903	U133Asc2	brain abundant, membrane attached signal protein 1	BASP1	10409
202393_s_at	0.986741	0.935912	U133Asc2	Kruppel-like factor 10	KLF10	7071
202394_s_at	0.925577	0.0750326	U133Asc2	ATP-binding cassette, sub-family F (GCN20), member 3	ABCF3	55324
202395_at	1.07899	0.380413	U133Asc2	N-ethylmaleimide-sensitive factor	NSF	4905
202396_at	0.895047	0.175009	U133Asc2	transcription elongation regulator 1	TCERG1	10915
202397_at	1.0418	0.668238	U133Asc2	nuclear transport factor 2	NUTF2	10204
202399_s_at	0.91888	0.011052	U133Asc2	adaptor-related protein complex 3, sigma 2 subunit	AP3S2	10239
202401_s_at	1.01382	0.836971	U133Asc2	serum response factor (c-fos serum response element-binding transcription factor)	SRF	6722
202402_s_at	1.17608	0.197277	U133Asc2	cysteinyl-tRNA synthetase	CARS	833
202403_s_at	1.35465	0.0296198	U133Asc2	collagen, type I, alpha 2	COL1A2	1278
202404_s_at	1.61047	0.147482	U133Asc2	collagen, type I, alpha 2	COL1A2	1278
202405_at	0.546667	0.0433689	U133Asc2	TIA1 cytotoxic granule-associated RNA binding protein-like 1	TIAL1	7073
202406_s_at	1.04321	0.461918	U133Asc2	TIA1 cytotoxic granule-associated RNA binding protein-like 1	TIAL1	7073
202408_s_at	1.11239	0.13518	U133Asc2	PRP31 pre-mRNA processing factor 31 homolog (S. cerevisiae)	PRPF31	26121
202409_at	1.40232	0.0144633	U133Asc2	insulin-like growth factor 2 (somatomedin A)	IGF2	3481
202411_at	1.26827	0.0928468	U133Asc2	interferon, alpha-inducible protein 27	IFI27	3429
202412_s_at	0.99512	0.967981	U133Asc2	ubiquitin specific peptidase 1	USP1	7398
202413_s_at	1.01926	0.809806	U133Asc2	ubiquitin specific peptidase 1	USP1	7398
202414_at	0.978745	0.777201	U133Asc2	excision repair cross-complementing rodent repair deficiency, complementation group 5 (xeroderma pigmentosum, complementation group G (Cockayne syndrome))	ERCC5	2073
202416_at	0.900786	0.320664	U133Asc2	DnaJ (Hsp40) homolog, subfamily C, member 7	DNAJC7	7266
202417_at	1.01953	0.731556	U133Asc2	kelch-like ECH-associated protein 1	KEAP1	9817
202418_at	1.0127	0.864951	U133Asc2	Yip1 interacting factor homolog A (S. cerevisiae)	YIF1A	10897
202419_at	1.20048	0.08656	U133Asc2	follicular lymphoma variant translocation 1	FVT1	2531
202420_s_at	0.858912	0.0129765	U133Asc2	DEAH (Asp-Glu-Ala-His) box polypeptide 9	DHX9	1660
202421_at	0.994703	0.931414	U133Asc2	immunoglobulin superfamily, member 3	IGSF3	3321
202422_s_at	0.823227	0.0325832	U133Asc2	acyl-CoA synthetase long-chain family member 4	ACSL4	2182
202423_at	1.40751	0.00239976	U133Asc2	MYST histone acetyltransferase (monocytic leukemia) 3	MYST3	7994
202424_at	1.07239	0.217246	U133Asc2	mitogen-activated protein kinase kinase 2	MAP2K2	5605
202425_x_at	1.23579	0.106147	U133Asc2	protein phosphatase 3 (formerly 2B), catalytic subunit, alpha isoform	PPP3CA	5530
202426_s_at	0.870644	0.0555193	U133Asc2	retinoid X receptor, alpha	RXRA	6256
202427_s_at	0.980659	0.794025	U133Asc2	brain protein 44	BRP44	25874
202428_x_at	1.02035	0.841524	U133ASc1	diazepam binding inhibitor (GABA receptor modulator, acyl-Coenzyme A binding protein)	DBI	1622
202429_s_at	0.992893	0.909155	U133Asc2	protein phosphatase 3 (formerly 2B), catalytic subunit, alpha isoform	PPP3CA	5530
202432_at	0.9869	0.851109	U133ASc1	protein phosphatase 3 (formerly 2B), catalytic subunit, beta isoform	PPP3CB	5532
202433_at	0.851385	0.00220507	U133Asc2	solute carrier family 35, member B1	SLC35B1	10237
202435_s_at	1.20989	0.192765	U133Asc2	cytochrome P450, family 1, subfamily B, polypeptide 1	CYP1B1	1545
202437_s_at	1.0882	0.687372	U133Asc2	cytochrome P450, family 1, subfamily B, polypeptide 1	CYP1B1	1545
202438_x_at	1.25174	0.166917	U133Asc2	iduronate 2-sulfatase (Hunter syndrome)	IDS	3423
202439_s_at	0.755618	0.0940577	U133Asc2	iduronate 2-sulfatase (Hunter syndrome)	IDS	3423
202440_s_at	1.07343	0.277757	U133Asc2	suppression of tumorigenicity 5	ST5	6764
202441_at	1.27153	0.0147241	U133Asc2	ER lipid raft associated 1	ERLIN1	10613
202442_at	1.0592	0.415912	U133Asc2	adaptor-related protein complex 3, sigma 1 subunit	AP3S1	1176
202443_x_at	1.12522	0.303653	U133Asc2	Notch homolog 2 (Drosophila)	NOTCH2	4853
202446_s_at	1.01937	0.920738	U133Asc2	phospholipid scramblase 1	PLSCR1	5359
202447_at	0.995232	0.959646	U133Asc2	2,4-dienoyl CoA reductase 1, mitochondrial	DECR1	1666
202448_s_at	0.983258	0.667147	U133Asc2	zer-1 homolog (C. elegans)	ZER1	10444
202449_s_at	0.891479	0.0470764	U133Asc2	retinoid X receptor, alpha	RXRA	6256
202450_s_at	0.930995	0.348205	U133Asc2	cathepsin K	CTSK	1513
202451_at	1.28185	0.00165543	U133Asc2	general transcription factor IIH, polypeptide 1, 62kDa	GTF2H1	2965
202453_s_at	0.775426	0.00469409	U133Asc2	general transcription factor IIH, polypeptide 1, 62kDa	GTF2H1	2965
202454_s_at	1.11337	0.208637	U133Asc2	v-erb-b2 erythroblastic leukemia viral oncogene homolog 3 (avian)	ERBB3	2065
202457_s_at	0.961255	0.661575	U133Asc2	protein phosphatase 3 (formerly 2B), catalytic subunit, alpha isoform	PPP3CA	5530
202458_at	0.767283	0.0963294	U133Asc2	protease, serine, 23	PRSS23	11098
202459_s_at	0.99773	0.864158	U133Asc2	lipin 2	LPIN2	9663
202460_s_at	0.777407	0.0786303	U133Asc2	lipin 2	LPIN2	9663
202461_at	0.966655	0.538775	U133Asc2	eukaryotic translation initiation factor 2B, subunit 2 beta, 39kDa	EIF2B2	8892
202462_s_at	0.89365	0.155892	U133Asc2	DEAD (Asp-Glu-Ala-Asp) box polypeptide 46	DDX46	9879
202464_s_at	1.15711	0.580248	U133ASc1	6-phosphofructo-2-kinase/fructose-2,6-biphosphatase 3	PFKFB3	5209
202466_at	0.947016	0.395362	U133Asc2	polymerase (DNA directed) sigma	POLS	11044
202467_s_at	0.916858	0.232482	U133Asc2	COP9 constitutive photomorphogenic homolog subunit 2 (Arabidopsis)	COPS2	9318
202468_s_at	1.04661	0.717112	U133Asc2	catenin (cadherin-associated protein), alpha-like 1	CTNNAL1	8727
202469_s_at	0.826382	0.0208984	U133Asc2	cleavage and polyadenylation specific factor 6, 68kDa	CPSF6	11052
202471_s_at	0.809746	7.57723e-05	U133Asc2	isocitrate dehydrogenase 3 (NAD+) gamma	IDH3G	3421
202474_s_at	0.995259	0.938264	U133Asc2	host cell factor C1 (VP16-accessory protein)	HCFC1	3054
202475_at	0.764763	5.89501e-05	U133Asc2	transmembrane protein 147	TMEM147	10430
202477_s_at	1.1587	0.0299826	U133Asc2	tubulin, gamma complex associated protein 2	TUBGCP2	10844
202478_at	0.936079	0.560157	U133Asc2	tribbles homolog 2 (Drosophila)	TRIB2	28951
202479_s_at	0.881109	0.146081	U133Asc2	tribbles homolog 2 (Drosophila)	TRIB2	28951
202480_s_at	0.815501	0.0643096	U133Asc2	death effector domain containing	DEDD	9191
202481_at	0.97062	0.722352	U133Asc2	dehydrogenase/reductase (SDR family) member 3	DHRS3	9249
202483_s_at	0.968095	0.500209	U133Asc2	RAN binding protein 1	RANBP1	5902
202484_s_at	0.762861	0.0448196	U133Asc2	methyl-CpG binding domain protein 2	MBD2	8932
202485_s_at	0.919346	0.478854	U133Asc2	methyl-CpG binding domain protein 2	MBD2	8932
202486_at	0.85481	0.0230847	U133Asc2	AFG3 ATPase family gene 3-like 2 (yeast)	AFG3L2	10939
202487_s_at	0.915326	0.184816	U133Asc2	H2A histone family, member V	H2AFV	94239
202488_s_at	1.05011	0.465913	U133Asc2	FXYD domain containing ion transport regulator 3	FXYD3	5349
202491_s_at	1.30396	0.0291301	U133Asc2	inhibitor of kappa light polypeptide gene enhancer in B-cells, kinase complex-associated protein	IKBKAP	8518
202492_at	0.936461	0.354605	U133Asc2	ATG9 autophagy related 9 homolog A (S. cerevisiae)	ATG9A	79065
202495_at	0.790991	0.00182179	U133Asc2	tubulin folding cofactor C	TBCC	6903
202499_s_at	0.950545	0.432964	U133Asc2	solute carrier family 2 (facilitated glucose transporter), member 3	SLC2A3	6515
202500_at	1.27787	0.087763	U133Asc2	DnaJ (Hsp40) homolog, subfamily B, member 2	DNAJB2	3300
202501_at	0.746387	0.0146483	U133Asc2	microtubule-associated protein, RP/EB family, member 2	MAPRE2	10982
202502_at	0.964765	0.56675	U133ASc1	acyl-Coenzyme A dehydrogenase, C-4 to C-12 straight chain	ACADM	34
202503_s_at	1.25075	0.0696164	U133Asc2	KIAA0101	KIAA0101	9768
202505_at	1.07556	0.136176	U133Asc2	small nuclear ribonucleoprotein polypeptide B''	SNRPB2	6629
202506_at	0.962957	0.726869	U133Asc2	sperm specific antigen 2	SSFA2	6744
202510_s_at	1.03804	0.655508	U133Asc2	tumor necrosis factor, alpha-induced protein 2	TNFAIP2	7127
202511_s_at	0.855649	0.0652775	U133Asc2	ATG5 autophagy related 5 homolog (S. cerevisiae)	ATG5	9474
202512_s_at	0.858053	0.10864	U133Asc2	ATG5 autophagy related 5 homolog (S. cerevisiae)	ATG5	9474
202513_s_at	0.896669	0.0775156	U133Asc2	protein phosphatase 2, regulatory subunit B', delta isoform	PPP2R5D	5528
202514_at	1.04271	0.789823	U133Asc2	discs, large homolog 1 (Drosophila)	DLG1	1739
202515_at	1.28442	4.1953e-06	U133Asc2	discs, large homolog 1 (Drosophila)	DLG1	1739
202516_s_at	1.44714	0.410305	U133Asc2	discs, large homolog 1 (Drosophila)	DLG1	1739
202518_at	1.02635	0.70871	U133Asc2	B-cell CLL/lymphoma 7B	BCL7B	9275
202519_at	1.38767	0.0438503	U133Asc2	MLX interacting protein	MLXIP	22877
202520_s_at	1.15445	0.0112618	U133Asc2	mutL homolog 1, colon cancer, nonpolyposis type 2 (E. coli)	MLH1	4292
202521_at	1.2138	0.00160223	U133Asc2	CCCTC-binding factor (zinc finger protein)	CTCF	10664
202522_at	1.02486	0.624028	U133Asc2	phosphatidylinositol transfer protein, beta	PITPNB	23760
202523_s_at	0.9848	0.094172	U133Asc2	sparc/osteonectin, cwcv and kazal-like domains proteoglycan (testican) 2	SPOCK2	9806
202524_s_at	0.994595	0.951245	U133Asc2	sparc/osteonectin, cwcv and kazal-like domains proteoglycan (testican) 2	SPOCK2	9806
202526_at	0.927271	0.195736	U133Asc2	SMAD family member 4	SMAD4	4089
202527_s_at	0.763637	0.0464929	U133Asc2	SMAD family member 4	SMAD4	4089
202529_at	0.963295	0.677175	U133Asc2	phosphoribosyl pyrophosphate synthetase-associated protein 1	PRPSAP1	5635
202530_at	0.95621	0.518487	U133Asc2	mitogen-activated protein kinase 14	MAPK14	1432
202532_s_at	0.957338	0.448034	U133Asc2	dihydrofolate reductase	DHFR	1719
202534_x_at	1.08717	0.443496	U133Asc2	dihydrofolate reductase	DHFR	1719
202536_at	0.849961	0.103283	U133Asc2	chromatin modifying protein 2B	CHMP2B	25978
202537_s_at	1.54838	0.0613059	U133Asc2	chromatin modifying protein 2B	CHMP2B	25978
202538_s_at	1.02902	0.615519	U133Asc2	chromatin modifying protein 2B	CHMP2B	25978
202541_at	0.813359	0.0212194	U133Asc2	small inducible cytokine subfamily E, member 1 (endothelial monocyte-activating)	SCYE1	9255
202542_s_at	1.01909	0.778939	U133Asc2	small inducible cytokine subfamily E, member 1 (endothelial monocyte-activating)	SCYE1	9255
202543_s_at	1.15608	0.238282	U133Asc2	glia maturation factor, beta	GMFB	2764
202544_at	1.04982	0.579132	U133Asc2	glia maturation factor, beta	GMFB	2764
202547_s_at	0.696163	0.00200701	U133Asc2	Rho guanine nucleotide exchange factor (GEF) 7	ARHGEF7	8874
202548_s_at	1.09747	0.319057	U133Asc2	Rho guanine nucleotide exchange factor (GEF) 7	ARHGEF7	8874
202549_at	1.09948	0.724855	U133Asc2	VAMP (vesicle-associated membrane protein)-associated protein B and C	VAPB	9217
202550_s_at	0.996704	0.944735	U133Asc2	VAMP (vesicle-associated membrane protein)-associated protein B and C	VAPB	9217
202551_s_at	0.579033	0.0289179	U133Asc2	cysteine rich transmembrane BMP regulator 1 (chordin-like)	CRIM1	51232
202552_s_at	1.06957	0.481083	U133Asc2	cysteine rich transmembrane BMP regulator 1 (chordin-like)	CRIM1	51232
202553_s_at	0.976794	0.650168	U133Asc2	SYF2 homolog, RNA splicing factor (S. cerevisiae)	SYF2	25949
202554_s_at	0.843688	0.187162	U133Asc2	glutathione S-transferase M3 (brain)	GSTM3	2947
202556_s_at	0.890901	0.117564	U133Asc2	microspherule protein 1	MCRS1	10445
202557_at	0.825728	0.145707	U133Asc2	stress 70 protein chaperone, microsome-associated, 60kDa	STCH	6782
202558_s_at	1.10214	0.500449	U133Asc2	stress 70 protein chaperone, microsome-associated, 60kDa	STCH	6782
202559_x_at	1.11196	0.0868221	U133Asc2	chromosome 1 open reading frame 77	C1orf77	26097
202560_s_at	1.13408	0.215888	U133Asc2	chromosome 1 open reading frame 77	C1orf77	26097
202561_at	0.941003	0.37858	U133Asc2	tankyrase, TRF1-interacting ankyrin-related ADP-ribose polymerase	TNKS	8658
202564_x_at	0.763571	4.13581e-06	U133ASc1	ADP-ribosylation factor-like 2	ARL2	402
202565_s_at	1.1145	0.0325408	U133ASc1	supervillin	SVIL	6840
202566_s_at	0.8149	0.0286883	U133ASc1	supervillin	SVIL	6840
202567_at	0.768712	0.000447061	U133Asc2	small nuclear ribonucleoprotein D3 polypeptide 18kDa	SNRPD3	6634
202568_s_at	0.95607	0.342268	U133Asc2	MAP/microtubule affinity-regulating kinase 3	MARK3	4140
202569_s_at	0.913047	0.320233	U133Asc2	MAP/microtubule affinity-regulating kinase 3	MARK3	4140
202572_s_at	1.49222	0.000680382	U133Asc2	discs, large (Drosophila) homolog-associated protein 4	DLGAP4	22839
202573_at	1.12053	0.225736	U133Asc2	casein kinase 1, gamma 2	CSNK1G2	1455
202576_s_at	0.803752	0.0335419	U133Asc2	DEAD (Asp-Glu-Ala-As) box polypeptide 19B /// DEAD (Asp-Glu-Ala-As) box polypeptide 19A	DDX19A /// DDX19B	11269 /// 55308
202577_s_at	1.19376	0.0619043	U133Asc2	DEAD (Asp-Glu-Ala-As) box polypeptide 19A	DDX19A	55308
202578_s_at	0.807502	0.0476571	U133Asc2	DEAD (Asp-Glu-Ala-As) box polypeptide 19A	DDX19A	55308
202579_x_at	0.852683	0.00577043	U133Asc2	high mobility group nucleosomal binding domain 4	HMGN4	10473
202581_at	1.09456	0.614118	U133Asc2	heat shock 70kDa protein 1B	HSPA1B	3304
202582_s_at	0.81035	0.00238976	U133Asc2	RAN binding protein 9	RANBP9	10048
202583_s_at	0.738983	0.0134193	U133Asc2	RAN binding protein 9	RANBP9	10048
202584_at	1.00674	0.698609	U133Asc2	nuclear transcription factor, X-box binding 1	NFX1	4799
202587_s_at	0.740851	0.00126544	U133ASc1	adenylate kinase 1	AK1	203
202588_at	0.930951	0.338671	U133ASc1	adenylate kinase 1	AK1	203
202590_s_at	0.981869	0.808777	U133Asc2	pyruvate dehydrogenase kinase, isozyme 2	PDK2	5164
202591_s_at	0.856297	0.0280539	U133Asc2	single-stranded DNA binding protein 1	SSBP1	6742
202592_at	1.12527	0.134501	U133Asc2	biogenesis of lysosome-related organelles complex-1, subunit 1	BLOC1S1	2647
202593_s_at	0.507436	8.69215e-06	U133Asc2	membrane interacting protein of RGS16	MIR16	51573
202594_at	1.1234	0.201525	U133Asc2	leptin receptor overlapping transcript-like 1	LEPROTL1	23484
202595_s_at	0.624074	0.00665984	U133Asc2	leptin receptor overlapping transcript-like 1	LEPROTL1	23484
202596_at	0.978952	0.787364	U133Asc2	endosulfine alpha	ENSA	2029
202598_at	0.763313	0.0450928	U133Asc2	S100 calcium binding protein A13	S100A13	6284
202599_s_at	0.571963	3.10709e-07	U133Asc2	nuclear receptor interacting protein 1	NRIP1	8204
202600_s_at	0.822748	0.30814	U133Asc2	nuclear receptor interacting protein 1	NRIP1	8204
202602_s_at	1.07889	0.244663	U133Asc2	HIV-1 Tat specific factor 1	HTATSF1	27336
202603_at	1.06565	0.302713	U133Asc2	Clone MO-30 mRNA sequence	---	0
202604_x_at	0.976339	0.526784	U133Asc2	ADAM metallopeptidase domain 10	ADAM10	102
202605_at	1.21641	0.00964883	U133Asc2	glucuronidase, beta	GUSB	2990
202606_s_at	0.883875	0.0846079	U133Asc2	tousled-like kinase 1	TLK1	9874
202607_at	0.97282	0.675961	U133Asc2	N-deacetylase/N-sulfotransferase (heparan glucosaminyl) 1	NDST1	3340
202609_at	0.940372	0.568809	U133Asc2	epidermal growth factor receptor pathway substrate 8	EPS8	2059
202610_s_at	0.934152	0.383708	U133Asc2	cofactor required for Sp1 transcriptional activation, subunit 2, 150kDa	CRSP2	9282
202611_s_at	1.00955	0.959255	U133Asc2	cofactor required for Sp1 transcriptional activation, subunit 2, 150kDa	CRSP2	9282
202613_at	1.06535	0.478866	U133Asc2	CTP synthase	CTPS	1503
202614_at	0.821758	0.00142179	U133Asc2	solute carrier family 30 (zinc transporter), member 9	SLC30A9	10463
202615_at	1.56259	0.00142226	U133Asc2	Guanine nucleotide binding protein (G protein), q polypeptide	GNAQ	2776
202619_s_at	0.982827	0.726995	U133Asc2	procollagen-lysine, 2-oxoglutarate 5-dioxygenase 2	PLOD2	5352
202620_s_at	1.1443	0.575357	U133Asc2	procollagen-lysine, 2-oxoglutarate 5-dioxygenase 2	PLOD2	5352
202621_at	1.17724	0.0112224	U133Asc2	interferon regulatory factor 3	IRF3	3661
202623_at	0.868219	0.0833303	U133Asc2	E2F-associated phosphoprotein	EAPP	55837
202625_at	0.951411	0.062102	U133Asc2	v-yes-1 Yamaguchi sarcoma viral related oncogene homolog	LYN	4067
202629_at	0.994121	0.931043	U133Asc2	amyloid beta precursor protein (cytoplasmic tail) binding protein 2	APPBP2	10513
202630_at	0.866073	0.111316	U133Asc2	amyloid beta precursor protein (cytoplasmic tail) binding protein 2	APPBP2	10513
202631_s_at	0.873168	0.220265	U133Asc2	amyloid beta precursor protein (cytoplasmic tail) binding protein 2	APPBP2	10513
202633_at	1.07425	0.301112	U133Asc2	topoisomerase (DNA) II binding protein 1	TOPBP1	11073
202634_at	0.660202	9.18405e-05	U133Asc2	polymerase (RNA) II (DNA directed) polypeptide K, 7.0kDa	POLR2K	5440
202635_s_at	0.827045	0.051439	U133Asc2	polymerase (RNA) II (DNA directed) polypeptide K, 7.0kDa	POLR2K	5440
202636_at	0.993407	0.892587	U133Asc2	ring finger protein 103	RNF103	7844
202637_s_at	0.832682	0.00203401	U133Asc2	intercellular adhesion molecule 1 (CD54), human rhinovirus receptor	ICAM1	3383
202641_at	1.07031	0.366894	U133Asc2	ADP-ribosylation factor-like 3	ARL3	403
202642_s_at	0.883899	0.00250239	U133Asc2	transformation/transcription domain-associated protein	TRRAP	8295
202644_s_at	1.12717	0.340429	U133Asc2	tumor necrosis factor, alpha-induced protein 3	TNFAIP3	7128
202645_s_at	1.08417	0.265338	U133Asc2	multiple endocrine neoplasia I	MEN1	4221
202646_s_at	1.29811	0.000499451	U133ASc1	cold shock domain containing E1, RNA-binding	CSDE1	7812
202647_s_at	0.975405	0.587973	U133Asc2	neuroblastoma RAS viral (v-ras) oncogene homolog	NRAS	4893
202649_x_at	0.922628	0.155268	U133ASc1	ribosomal protein S19	RPS19	6223
202650_s_at	1.04642	0.423848	U133Asc2	KIAA0195	KIAA0195	9772
202651_at	1.02099	0.843572	U133Asc2	lysophosphatidylglycerol acyltransferase 1	LPGAT1	9926
202652_at	1.1041	0.171631	U133Asc2	amyloid beta (A4) precursor protein-binding, family B, member 1 (Fe65)	APBB1	322
202653_s_at	1.04891	0.609812	U133Asc2	membrane-associated ring finger (C3HC4) 7	39148	64844
202654_x_at	0.814807	0.123071	U133Asc2	membrane-associated ring finger (C3HC4) 7	39148	64844
202656_s_at	1.96329	0.00510923	U133Asc2	SERTA domain containing 2	SERTAD2	9792
202657_s_at	1.21868	0.0687429	U133Asc2	SERTA domain containing 2	SERTAD2	9792
202658_at	0.995049	0.934912	U133Asc2	peroxisomal biogenesis factor 11B	PEX11B	8799
202660_at	1.17831	0.187233	U133Asc2	inositol 1,4,5-triphosphate receptor, type 2	ITPR2	3709
202662_s_at	0.97058	0.545332	U133Asc2	inositol 1,4,5-triphosphate receptor, type 2	ITPR2	3709
202664_at	1.13267	0.427699	U133Asc2	WAS/WASL interacting protein family, member 1	WIPF1	7456
202665_s_at	0.953491	0.449517	U133Asc2	WAS/WASL interacting protein family, member 1	WIPF1	7456
202666_s_at	0.856742	0.12335	U133Asc2	actin-like 6A	ACTL6A	86
202667_s_at	0.618209	0.00307908	U133Asc2	solute carrier family 39 (zinc transporter), member 7	SLC39A7	7922
202668_at	0.797507	0.0260166	U133Asc2	ephrin-B2	EFNB2	1948
202669_s_at	0.95484	0.817025	U133Asc2	ephrin-B2	EFNB2	1948
202670_at	1.08513	0.331542	U133Asc2	mitogen-activated protein kinase kinase 1	MAP2K1	5604
202672_s_at	1.0124	0.893176	U133Asc2	activating transcription factor 3	ATF3	467
202673_at	0.81429	0.00727792	U133Asc2	dolichyl-phosphate mannosyltransferase polypeptide 1, catalytic subunit	DPM1	8813
202674_s_at	0.969125	0.790542	U133Asc2	LIM domain 7	LMO7	4008
202675_at	0.892533	0.0471292	U133ASc1	succinate dehydrogenase complex, subunit B, iron sulfur (Ip)	SDHB	6390
202676_x_at	1.0159	0.743393	U133ASc1	Fas-activated serine/threonine kinase	FASTK	10922
202677_at	1.04681	0.644876	U133Asc2	RAS p21 protein activator (GTPase activating protein) 1	RASA1	5921
202678_at	0.913336	0.198695	U133Asc2	general transcription factor IIA, 2, 12kDa	GTF2A2	2958
202679_at	1.40026	0.407091	U133Asc2	Niemann-Pick disease, type C1	NPC1	4864
202681_at	0.953586	0.451935	U133Asc2	ubiquitin specific peptidase 4 (proto-oncogene)	USP4	7375
202682_s_at	1.01649	0.812022	U133Asc2	ubiquitin specific peptidase 4 (proto-oncogene)	USP4	7375
202683_s_at	1.05501	0.609058	U133Asc2	RNA (guanine-7-) methyltransferase	RNMT	8731
202686_s_at	0.797072	0.0820763	U133Asc2	AXL receptor tyrosine kinase	AXL	558
202687_s_at	1.39054	0.500842	U133Asc2	tumor necrosis factor (ligand) superfamily, member 10	TNFSF10	8743
202688_at	1.27542	0.125324	U133Asc2	tumor necrosis factor (ligand) superfamily, member 10	TNFSF10	8743
202689_at	1.03417	0.395926	U133Asc2	RNA binding motif protein 15B	RBM15B	29890
202690_s_at	0.954037	0.603213	U133Asc2	small nuclear ribonucleoprotein D1 polypeptide 16kDa	SNRPD1	6632
202691_at	0.936346	0.0308952	U133Asc2	small nuclear ribonucleoprotein D1 polypeptide 16kDa	SNRPD1	6632
202692_s_at	0.97724	0.741426	U133Asc2	upstream binding transcription factor, RNA polymerase I	UBTF	7343
202696_at	1.01897	0.813745	U133Asc2	oxidative-stress responsive 1	OXSR1	9943
202697_at	0.800006	0.0475171	U133Asc2	nudix (nucleoside diphosphate linked moiety X)-type motif 21	NUDT21	11051
202698_x_at	0.947526	0.283251	U133ASc1	cytochrome c oxidase subunit IV isoform 1	COX4I1	1327
202702_at	1.10216	0.248659	U133Asc2	tripartite motif-containing 26	TRIM26	7726
202703_at	1.00814	0.888724	U133Asc2	dual specificity phosphatase 11 (RNA/RNP complex 1-interacting)	DUSP11	8446
202704_at	0.942489	0.327091	U133ASc1	transducer of ERBB2, 1	TOB1	10140
202708_s_at	0.937403	0.451959	U133Asc2	histone cluster 2, H2be	HIST2H2BE	8349
202709_at	0.965926	0.317969	U133Asc2	fibromodulin	FMOD	2331
202710_at	1.23797	0.0378547	U133Asc2	BET1 homolog (S. cerevisiae)	BET1	10282
202713_s_at	1.11459	0.269103	U133Asc2	KIAA0391	KIAA0391	9692
202716_at	0.908966	0.370726	U133Asc2	protein tyrosine phosphatase, non-receptor type 1	PTPN1	5770
202717_s_at	0.997483	0.979304	U133Asc2	cell division cycle 16 homolog (S. cerevisiae)	CDC16	8881
202720_at	1.04356	0.574449	U133Asc2	testis derived transcript (3 LIM domains)	TES	26136
202722_s_at	1.02719	0.921573	U133Asc2	glutamine-fructose-6-phosphate transaminase 1	GFPT1	2673
202724_s_at	1.02293	0.829786	U133Asc2	forkhead box O1	FOXO1	2308
202727_s_at	0.994921	0.924268	U133Asc2	interferon gamma receptor 1	IFNGR1	3459
202729_s_at	1.16917	0.0479847	U133Asc2	latent transforming growth factor beta binding protein 1	LTBP1	4052
202731_at	0.660244	0.0226995	U133Asc2	programmed cell death 4 (neoplastic transformation inhibitor)	PDCD4	27250
202732_at	1.15666	0.0119567	U133Asc2	protein kinase (cAMP-dependent, catalytic) inhibitor gamma	PKIG	11142
202733_at	1.40172	0.0192653	U133Asc2	procollagen-proline, 2-oxoglutarate 4-dioxygenase (proline 4-hydroxylase), alpha polypeptide II	P4HA2	8974
202734_at	1.21096	0.00286586	U133ASc1	thyroid hormone receptor interactor 10	TRIP10	9322
202736_s_at	0.735165	0.0035625	U133Asc2	LSM4 homolog, U6 small nuclear RNA associated (S. cerevisiae)	LSM4	25804
202737_s_at	1.11969	0.105507	U133Asc2	LSM4 homolog, U6 small nuclear RNA associated (S. cerevisiae)	LSM4	25804
202738_s_at	0.776337	0.00206725	U133Asc2	phosphorylase kinase, beta	PHKB	5257
202739_s_at	0.971042	0.720034	U133Asc2	phosphorylase kinase, beta	PHKB	5257
202740_at	0.876184	0.0139781	U133Asc2	aminoacylase 1	ACY1	95
202741_at	1.10983	0.113783	U133Asc2	protein kinase, cAMP-dependent, catalytic, beta	PRKACB	5567
202742_s_at	0.986058	0.396454	U133Asc2	protein kinase, cAMP-dependent, catalytic, beta	PRKACB	5567
202743_at	0.939872	0.448952	U133Asc2	phosphoinositide-3-kinase, regulatory subunit 3 (p55, gamma)	PIK3R3	8503
202744_at	0.985629	0.818128	U133Asc2	solute carrier family 20 (phosphate transporter), member 2	SLC20A2	6575
202745_at	0.747675	0.0106863	U133Asc2	ubiquitin specific peptidase 8	USP8	9101
202746_at	1.02342	0.887798	U133Asc2	integral membrane protein 2A	ITM2A	9452
202748_at	0.883211	0.521082	U133Asc2	guanylate binding protein 2, interferon-inducible	GBP2	2634
202749_at	0.977382	0.835362	U133Asc2	tryptophan rich basic protein	WRB	7485
202750_s_at	0.84587	0.184187	U133Asc2	tuftelin interacting protein 11	TFIP11	24144
202753_at	0.981374	0.61762	U133Asc2	proteasome (prosome, macropain) 26S subunit, non-ATPase, 6	PSMD6	9861
202754_at	0.968688	0.6635	U133Asc2	R3H domain containing 1	R3HDM1	23518
202756_s_at	1.10835	0.170483	U133Asc2	glypican 1	GPC1	2817
202757_at	1.28238	0.00206375	U133Asc2	cofactor of BRCA1	RP13-122B23.3	25920
202759_s_at	1.17464	0.110307	U133Asc2	A kinase (PRKA) anchor protein 2 /// PALM2-AKAP2 protein	AKAP2 /// PALM2-AKAP2	11217 /// 445815
202760_s_at	1.59928	0.0433832	U133Asc2	A kinase (PRKA) anchor protein 2 /// PALM2-AKAP2 protein	AKAP2 /// PALM2-AKAP2	11217 /// 445815
202761_s_at	0.788373	0.0250271	U133Asc2	spectrin repeat containing, nuclear envelope 2	SYNE2	23224
202762_at	0.905312	0.170023	U133Asc2	Rho-associated, coiled-coil containing protein kinase 2	ROCK2	9475
202763_at	0.962195	0.240789	U133Asc2	caspase 3, apoptosis-related cysteine peptidase	CASP3	836
202764_at	1.34579	0.0116923	U133Asc2	stromal interaction molecule 1	STIM1	6786
202766_s_at	1.06799	0.79393	U133Asc2	fibrillin 1	FBN1	2200
202767_at	1.24134	0.133997	U133Asc2	acid phosphatase 2, lysosomal	ACP2	53
202769_at	0.875367	0.504328	U133Asc2	cyclin G2	CCNG2	901
202770_s_at	1.19448	0.472191	U133Asc2	cyclin G2	CCNG2	901
202772_at	1.12248	0.0378546	U133Asc2	3-hydroxymethyl-3-methylglutaryl-Coenzyme A lyase (hydroxymethylglutaricaciduria)	HMGCL	3155
202774_s_at	1.24613	0.00479995	U133Asc2	splicing factor, arginine/serine-rich 8 (suppressor-of-white-apricot homolog, Drosophila)	SFRS8	6433
202776_at	1.19214	0.00225932	U133Asc2	deoxynucleotidyltransferase, terminal, interacting protein 2	DNTTIP2	30836
202777_at	0.986374	0.819702	U133Asc2	soc-2 suppressor of clear homolog (C. elegans)	SHOC2	8036
202778_s_at	0.830384	0.0289221	U133Asc2	zinc finger, MYM-type 2	ZMYM2	7750
202780_at	1.30647	0.187228	U133Asc2	3-oxoacid CoA transferase 1	OXCT1	5019
202781_s_at	0.651689	0.000782999	U133Asc2	skeletal muscle and kidney enriched inositol phosphatase	SKIP	51763
202782_s_at	1.04326	0.544577	U133Asc2	skeletal muscle and kidney enriched inositol phosphatase	SKIP	51763
202783_at	0.796907	0.0802388	U133Asc2	nicotinamide nucleotide transhydrogenase	NNT	23530
202784_s_at	0.767468	0.0783928	U133Asc2	nicotinamide nucleotide transhydrogenase	NNT	23530
202785_at	0.800256	2.50357e-05	U133Asc2	NADH dehydrogenase (ubiquinone) 1 alpha subcomplex, 7, 14.5kDa	NDUFA7	4701
202786_at	0.947361	0.498068	U133Asc2	serine threonine kinase 39 (STE20/SPS1 homolog, yeast)	STK39	27347
202787_s_at	0.712957	0.00429836	U133Asc2	mitogen-activated protein kinase-activated protein kinase 3	MAPKAPK3	7867
202788_at	0.91235	0.200791	U133Asc2	mitogen-activated protein kinase-activated protein kinase 3	MAPKAPK3	7867
202791_s_at	1.04599	0.340706	U133Asc2	SAPS domain family, member 2	SAPS2	9701
202793_at	0.832585	0.150919	U133Asc2	membrane bound O-acyltransferase domain containing 5	MBOAT5	10162
202794_at	0.954772	0.633976	U133Asc2	inositol polyphosphate-1-phosphatase	INPP1	3628
202795_x_at	1.12678	0.0624567	U133Asc2	TRIO and F-actin binding protein	TRIOBP	11078
202796_at	1.1831	0.0415925	U133Asc2	synaptopodin	SYNPO	11346
202797_at	1.17583	0.196625	U133Asc2	SAC1 suppressor of actin mutations 1-like (yeast)	SACM1L	22908
202798_at	1.02564	0.81209	U133Asc2	SEC24 related gene family, member B (S. cerevisiae)	SEC24B	10427
202799_at	0.860312	0.00466827	U133Asc2	ClpP caseinolytic peptidase, ATP-dependent, proteolytic subunit homolog (E. coli)	CLPP	8192
2028_s_at	0.992517	0.736081	U133Asc2	E2F transcription factor 1	E2F1	1869
202800_at	1.43369	0.0256518	U133Asc2	solute carrier family 1 (glial high affinity glutamate transporter), member 3	SLC1A3	6507
202801_at	1.18672	0.0169979	U133ASc1	protein kinase, cAMP-dependent, catalytic, alpha	PRKACA	5566
202802_at	0.926306	0.251263	U133Asc2	deoxyhypusine synthase	DHPS	1725
202803_s_at	1.07493	0.728342	U133Asc2	integrin, beta 2 (complement component 3 receptor 3 and 4 subunit)	ITGB2	3689
202804_at	0.835988	0.0146514	U133Asc2	ATP-binding cassette, sub-family C (CFTR/MRP), member 1	ABCC1	4363
202807_s_at	0.90845	0.306701	U133Asc2	target of myb1 (chicken)	TOM1	10043
202808_at	1.22635	0.0923123	U133Asc2	---	---	---
202809_s_at	1.22942	0.0139689	U133Asc2	integrator complex subunit 3	INTS3	65123
202810_at	0.906159	0.00766943	U133Asc2	developmentally regulated GTP binding protein 1	DRG1	4733
202811_at	0.954328	0.551802	U133Asc2	STAM binding protein	STAMBP	10617
202812_at	0.797976	0.153007	U133Asc2	glucosidase, alpha; acid (Pompe disease, glycogen storage disease type II)	GAA	2548
202813_at	1.04609	0.389761	U133Asc2	Tar (HIV-1) RNA binding protein 1	TARBP1	6894
202814_s_at	1.12928	0.235431	U133Asc2	hexamethylene bis-acetamide inducible 1	HEXIM1	10614
202815_s_at	1.09519	0.257764	U133Asc2	hexamethylene bis-acetamide inducible 1	HEXIM1	10614
202817_s_at	0.865291	0.0812219	U133Asc2	synovial sarcoma translocation, chromosome 18	SS18	6760
202818_s_at	0.656413	0.0153275	U133Asc2	transcription elongation factor B (SIII), polypeptide 3 (110kDa, elongin A)	TCEB3	6924
202820_at	0.837423	0.317323	U133Asc2	aryl hydrocarbon receptor	AHR	196
202821_s_at	1.08851	0.616371	U133Asc2	LIM domain containing preferred translocation partner in lipoma	LPP	4026
202822_at	1.55048	0.0202172	U133Asc2	LIM domain containing preferred translocation partner in lipoma	LPP	4026
202823_at	0.825068	0.120603	U133Asc2	transcription elongation factor B (SIII), polypeptide 1 (15kDa, elongin C)	TCEB1	6921
202824_s_at	0.941613	0.276551	U133ASc1	transcription elongation factor B (SIII), polypeptide 1 (15kDa, elongin C)	TCEB1	6921
202829_s_at	0.761971	0.0274439	U133Asc2	synaptobrevin-like 1	SYBL1	6845
202830_s_at	0.857871	0.115983	U133Asc2	solute carrier family 37 (glucose-6-phosphate transporter), member 4	SLC37A4	2542
202832_at	0.87133	0.161228	U133Asc2	GRIP and coiled-coil domain containing 2	GCC2	9648
202834_at	0.990406	0.846536	U133Asc2	angiotensinogen (serpin peptidase inhibitor, clade A, member 8)	AGT	183
202836_s_at	0.941459	0.288937	U133Asc2	thioredoxin-like 4A	TXNL4A	10907
202838_at	0.825766	0.0533109	U133Asc2	fucosidase, alpha-L- 1, tissue	FUCA1	2517
202839_s_at	0.798161	0.000232745	U133Asc2	NADH dehydrogenase (ubiquinone) 1 beta subcomplex, 7, 18kDa	NDUFB7	4713
202840_at	1.09921	0.497306	U133Asc2	TAF15 RNA polymerase II, TATA box binding protein (TBP)-associated factor, 68kDa	TAF15	8148
202841_x_at	0.93878	0.309452	U133Asc2	opioid growth factor receptor	OGFR	11054
202842_s_at	0.802152	0.00512994	U133Asc2	DnaJ (Hsp40) homolog, subfamily B, member 9	DNAJB9	4189
202843_at	0.865297	0.315026	U133Asc2	DnaJ (Hsp40) homolog, subfamily B, member 9	DNAJB9	4189
202844_s_at	1.52679	2.9375e-05	U133Asc2	ralA binding protein 1	RALBP1	10928
202845_s_at	1.01065	0.818587	U133Asc2	ralA binding protein 1	RALBP1	10928
202850_at	0.995727	0.962037	U133Asc2	ATP-binding cassette, sub-family D (ALD), member 3	ABCD3	5825
202852_s_at	1.11447	0.321605	U133Asc2	hypothetical protein FLJ11506	FLJ11506	79719
202853_s_at	0.93929	0.438915	U133Asc2	RYK receptor-like tyrosine kinase	RYK	6259
202854_at	1.00955	0.898784	U133Asc2	hypoxanthine phosphoribosyltransferase 1 (Lesch-Nyhan syndrome)	HPRT1	3251
202855_s_at	0.901441	0.788028	U133Asc2	solute carrier family 16, member 3 (monocarboxylic acid transporter 4)	SLC16A3	9123
202856_s_at	1.28922	0.357644	U133Asc2	solute carrier family 16, member 3 (monocarboxylic acid transporter 4)	SLC16A3	9123
202857_at	0.959413	0.525559	U133Asc2	transmembrane protein 4	TMEM4	10330
202858_at	1.2835	0.000124206	U133Asc2	U2 small nuclear RNA auxiliary factor 1	U2AF1	7307
202860_at	1.1187	0.0258652	U133Asc2	DENN/MADD domain containing 4B	DENND4B	9909
202861_at	1.19982	0.106712	U133Asc2	period homolog 1 (Drosophila)	PER1	5187
202862_at	0.888877	0.163416	U133Asc2	fumarylacetoacetate hydrolase (fumarylacetoacetase)	FAH	2184
202863_at	0.93218	0.537274	U133Asc2	SP100 nuclear antigen	SP100	6672
202867_s_at	0.609307	5.27832e-05	U133Asc2	DnaJ (Hsp40) homolog, subfamily B, member 12	DNAJB12	54788
202868_s_at	0.894155	0.141935	U133Asc2	processing of precursor 4, ribonuclease P/MRP subunit (S. cerevisiae)	POP4	10775
202872_at	0.938695	0.618598	U133Asc2	ATPase, H+ transporting, lysosomal 42kDa, V1 subunit C1	ATP6V1C1	528
202873_at	0.881751	0.426145	U133Asc2	ATPase, H+ transporting, lysosomal 42kDa, V1 subunit C1	ATP6V1C1	528
202874_s_at	0.670445	0.00401936	U133Asc2	ATPase, H+ transporting, lysosomal 42kDa, V1 subunit C1	ATP6V1C1	528
202876_s_at	1.13961	0.119189	U133Asc2	pre-B-cell leukemia homeobox 2	PBX2	5089
202878_s_at	1.1849	0.211181	U133Asc2	CD93 molecule	CD93	22918
202880_s_at	1.31611	0.0414367	U133Asc2	pleckstrin homology, Sec7 and coiled-coil domains 1(cytohesin 1)	PSCD1	9267
202882_x_at	0.983896	0.783782	U133Asc2	nucleolar protein 7, 27kDa	NOL7	51406
202887_s_at	1.274	0.0615616	U133Asc2	DNA-damage-inducible transcript 4	DDIT4	54541
202891_at	0.979397	0.726983	U133Asc2	nitrilase 1	NIT1	4817
202892_at	1.01948	0.836046	U133Asc2	cell division cycle 23 homolog (S. cerevisiae)	CDC23	8697
202893_at	0.831038	0.161015	U133Asc2	unc-13 homolog B (C. elegans)	UNC13B	10497
202896_s_at	1.07546	0.56364	U133Asc2	signal-regulatory protein alpha	SIRPA	140885
202897_at	1.04698	0.752615	U133Asc2	signal-regulatory protein alpha	SIRPA	140885
202899_s_at	0.745493	0.000327824	U133Asc2	splicing factor, arginine/serine-rich 3	SFRS3	6428
202900_s_at	0.90541	0.190732	U133Asc2	nucleoporin 88kDa	NUP88	4927
202901_x_at	0.971178	0.757433	U133Asc2	cathepsin S	CTSS	1520
202903_at	0.919134	0.47775	U133Asc2	LSM5 homolog, U6 small nuclear RNA associated (S. cerevisiae)	LSM5	23658
202904_s_at	0.858794	0.465001	U133Asc2	LSM5 homolog, U6 small nuclear RNA associated (S. cerevisiae)	LSM5	23658
202905_x_at	0.873857	0.239432	U133Asc2	nibrin	NBN	4683
202906_s_at	0.795037	0.078831	U133Asc2	nibrin	NBN	4683
202907_s_at	0.898055	0.181846	U133Asc2	nibrin	NBN	4683
202908_at	1.05775	0.615798	U133Asc2	Wolfram syndrome 1 (wolframin)	WFS1	7466
202909_at	1.33341	0.00600363	U133Asc2	EPM2A (laforin) interacting protein 1	EPM2AIP1	9852
202911_at	1.24531	0.00778992	U133Asc2	mutS homolog 6 (E. coli)	MSH6	2956
202912_at	1.20651	0.457054	U133Asc2	adrenomedullin	ADM	133
202915_s_at	1.24918	0.0237533	U133Asc2	family with sequence similarity 20, member B	FAM20B	9917
202916_s_at	1.09158	0.346808	U133Asc2	family with sequence similarity 20, member B	FAM20B	9917
202918_s_at	0.692826	0.0221455	U133Asc2	preimplantation protein 3	PREI3	25843
202919_at	0.91897	0.0589723	U133Asc2	preimplantation protein 3	PREI3	25843
202920_at	1.19015	0.0191278	U133Asc2	ankyrin 2, neuronal	ANK2	287
202921_s_at	0.742036	0.0566374	U133Asc2	ankyrin 2, neuronal	ANK2	287
202922_at	0.889455	0.27308	U133Asc2	glutamate-cysteine ligase, catalytic subunit	GCLC	2729
202923_s_at	0.739832	0.048759	U133Asc2	glutamate-cysteine ligase, catalytic subunit	GCLC	2729
202926_at	1.01437	0.80158	U133Asc2	neuroblastoma-amplified protein	NAG	51594
202927_at	0.928288	0.129981	U133Asc2	protein (peptidylprolyl cis/trans isomerase) NIMA-interacting 1	PIN1	5300
202929_s_at	0.74961	0.104525	U133Asc2	D-dopachrome tautomerase	DDT	1652
202930_s_at	0.822396	0.00732257	U133ASc1	succinate-CoA ligase, ADP-forming, beta subunit	SUCLA2	8803
202932_at	0.913614	0.548448	U133Asc2	v-yes-1 Yamaguchi sarcoma viral oncogene homolog 1	YES1	7525
202933_s_at	0.991493	0.928457	U133Asc2	v-yes-1 Yamaguchi sarcoma viral oncogene homolog 1	YES1	7525
202934_at	1.72977	0.0376782	U133Asc2	hexokinase 2	HK2	3099
202939_at	1.18448	0.0565253	U133Asc2	zinc metallopeptidase (STE24 homolog, S. cerevisiae)	ZMPSTE24	10269
202941_at	0.844437	0.00840571	U133ASc1	NADH dehydrogenase (ubiquinone) flavoprotein 2, 24kDa	NDUFV2	4729
202942_at	1.021	0.765013	U133Asc2	electron-transfer-flavoprotein, beta polypeptide	ETFB	2109
202943_s_at	1.02064	0.815453	U133Asc2	N-acetylgalactosaminidase, alpha-	NAGA	4668
202946_s_at	1.24458	0.101434	U133Asc2	BTB (POZ) domain containing 3	BTBD3	22903
202947_s_at	0.898485	0.00239373	U133Asc2	glycophorin C (Gerbich blood group)	GYPC	2995
202948_at	0.895082	0.323297	U133Asc2	interleukin 1 receptor, type I	IL1R1	3554
202949_s_at	0.773421	0.0612349	U133Asc2	four and a half LIM domains 2	FHL2	2274
202950_at	1.05445	0.644322	U133Asc2	crystallin, zeta (quinone reductase)	CRYZ	1429
202951_at	0.931245	0.283901	U133Asc2	serine/threonine kinase 38	STK38	11329
202954_at	1.27266	0.027492	U133Asc2	ubiquitin-conjugating enzyme E2C	UBE2C	11065
202955_s_at	0.914208	0.470792	U133Asc2	ADP-ribosylation factor guanine nucleotide-exchange factor 1(brefeldin A-inhibited)	ARFGEF1	10565
202956_at	1.02992	0.685727	U133Asc2	ADP-ribosylation factor guanine nucleotide-exchange factor 1(brefeldin A-inhibited)	ARFGEF1	10565
202957_at	1.00628	0.966539	U133Asc2	hematopoietic cell-specific Lyn substrate 1	HCLS1	3059
202959_at	1.01927	0.865044	U133Asc2	methylmalonyl Coenzyme A mutase	MUT	4594
202960_s_at	0.927716	0.335958	U133Asc2	methylmalonyl Coenzyme A mutase	MUT	4594
202961_s_at	0.932367	0.138088	U133ASc1	ATP synthase, H+ transporting, mitochondrial F0 complex, subunit F2	ATP5J2	9551
202962_at	1.06399	0.667941	U133Asc2	kinesin family member 13B	KIF13B	23303
202964_s_at	0.941059	0.379906	U133Asc2	regulatory factor X, 5 (influences HLA class II expression)	RFX5	5993
202967_at	0.955877	0.472841	U133Asc2	glutathione S-transferase A4	GSTA4	2941
202968_s_at	1.04003	0.717798	U133Asc2	dual-specificity tyrosine-(Y)-phosphorylation regulated kinase 2	DYRK2	8445
202969_at	1.07421	0.595289	U133Asc2	MRNA; cDNA DKFZp667B0924 (from clone DKFZp667B0924)	---	0
202970_at	1.02119	0.742712	U133Asc2	MRNA; cDNA DKFZp667B0924 (from clone DKFZp667B0924)	---	0
202971_s_at	1.4644	0.0882713	U133Asc2	dual-specificity tyrosine-(Y)-phosphorylation regulated kinase 2	DYRK2	8445
202972_s_at	1.1675	0.311121	U133Asc2	family with sequence similarity 13, member A1	FAM13A1	10144
202973_x_at	1.29771	0.00946596	U133Asc2	family with sequence similarity 13, member A1	FAM13A1	10144
202974_at	0.890656	0.109403	U133Asc2	membrane protein, palmitoylated 1, 55kDa	MPP1	4354
202975_s_at	0.97365	0.874874	U133Asc2	Rho-related BTB domain containing 3	RHOBTB3	22836
202976_s_at	1.17083	0.318858	U133Asc2	Rho-related BTB domain containing 3	RHOBTB3	22836
202978_s_at	0.743084	0.000826253	U133Asc2	CREB/ATF bZIP transcription factor	CREBZF	58487
202979_s_at	0.590057	0.0212078	U133Asc2	CREB/ATF bZIP transcription factor	CREBZF	58487
202980_s_at	0.618371	0.00175025	U133Asc2	seven in absentia homolog 1 (Drosophila)	SIAH1	6477
202981_x_at	1.07007	0.293261	U133Asc2	seven in absentia homolog 1 (Drosophila)	SIAH1	6477
202982_s_at	0.981732	0.875727	U133Asc2	acyl-CoA thioesterase 2 /// acyl-CoA thioesterase 1	ACOT1 /// ACOT2	10965 /// 641371
202983_at	1.10711	0.164604	U133Asc2	helicase-like transcription factor	HLTF	6596
202984_s_at	1.1704	0.401445	U133Asc2	BCL2-associated athanogene 5	BAG5	9529
202985_s_at	0.905905	0.198053	U133Asc2	BCL2-associated athanogene 5	BAG5	9529
202986_at	0.580729	0.0419043	U133Asc2	aryl-hydrocarbon receptor nuclear translocator 2	ARNT2	9915
202987_at	1.00137	0.981826	U133Asc2	TRAF3 interacting protein 2	TRAF3IP2	10758
202990_at	1.13552	0.284335	U133Asc2	phosphorylase, glycogen; liver (Hers disease, glycogen storage disease type VI)	PYGL	5836
202995_s_at	0.901332	0.691371	U133Asc2	fibulin 1	FBLN1	2192
203002_at	1.05069	0.724175	U133Asc2	angiomotin like 2	AMOTL2	51421
203003_at	0.969992	0.737238	U133Asc2	myocyte enhancer factor 2D	MEF2D	4209
203006_at	1.01368	0.809311	U133Asc2	inositol polyphosphate-5-phosphatase, 40kDa	INPP5A	3632
203007_x_at	0.745556	0.0871839	U133Asc2	lysophospholipase I	LYPLA1	10434
203008_x_at	0.898894	0.098798	U133Asc2	thioredoxin domain containing 9	TXNDC9	10190
203011_at	0.899625	0.210996	U133Asc2	inositol(myo)-1(or 4)-monophosphatase 1	IMPA1	3612
203013_at	0.968645	0.718094	U133Asc2	ecdysoneless homolog (Drosophila)	ECD	11319
203014_x_at	0.866717	0.117225	U133Asc2	RUN and TBC1 domain containing 3	RUTBC3	27352
203015_s_at	1.07166	0.143384	U133Asc2	synovial sarcoma, X breakpoint 2 interacting protein	SSX2IP	117178
203020_at	1.08089	0.496527	U133Asc2	RAB GTPase activating protein 1-like	RABGAP1L	9910
203022_at	0.930813	0.0497711	U133Asc2	ribonuclease H2, subunit A	RNASEH2A	10535
203023_at	0.705318	5.33201e-05	U133Asc2	hypothetical protein HSPC111	HSPC111	51491
203024_s_at	1.00934	0.906496	U133Asc2	chromosome 5 open reading frame 15	C5orf15	56951
203025_at	1.04689	0.427558	U133Asc2	ARD1 homolog A, N-acetyltransferase (S. cerevisiae)	ARD1A	8260
203026_at	0.888219	0.0939784	U133Asc2	zinc finger and BTB domain containing 5	ZBTB5	9925
203031_s_at	0.929192	0.328176	U133Asc2	uroporphyrinogen III synthase (congenital erythropoietic porphyria)	UROS	7390
203032_s_at	0.646913	0.0073541	U133Asc2	fumarate hydratase	FH	2271
203033_x_at	1.00037	0.991433	U133ASc1	fumarate hydratase	FH	2271
203034_s_at	0.94961	0.292164	U133ASc1	ribosomal protein L27a /// hCG21078	hCG_21078 /// RPL27A	389435 /// 6157
203037_s_at	1.30898	0.000331741	U133Asc2	metastasis suppressor 1	MTSS1	9788
203038_at	0.942575	0.628322	U133Asc2	protein tyrosine phosphatase, receptor type, K	PTPRK	5796
203039_s_at	0.892963	0.114305	U133Asc2	NADH dehydrogenase (ubiquinone) Fe-S protein 1, 75kDa (NADH-coenzyme Q reductase)	NDUFS1	4719
203040_s_at	0.931352	0.358368	U133Asc2	hydroxymethylbilane synthase	HMBS	3145
203041_s_at	1.16405	0.233117	U133Asc2	lysosomal-associated membrane protein 2	LAMP2	3920
203042_at	1.13643	0.358993	U133Asc2	lysosomal-associated membrane protein 2	LAMP2	3920
203043_at	0.55111	5.23588e-10	U133Asc2	zinc finger, BED-type containing 1	ZBED1	9189
203044_at	1.10056	0.228438	U133Asc2	carbohydrate (chondroitin) synthase 1	CHSY1	22856
203048_s_at	0.995418	0.960255	U133Asc2	KIAA0372	KIAA0372	9652
203049_s_at	0.894523	0.381419	U133Asc2	KIAA0372	KIAA0372	9652
203053_at	1.02504	0.758766	U133Asc2	breast carcinoma amplified sequence 2	BCAS2	10286
203054_s_at	0.777957	0.00575714	U133Asc2	T-cell leukemia translocation altered gene	TCTA	6988
203055_s_at	0.84659	0.02412	U133Asc2	Rho guanine nucleotide exchange factor (GEF) 1	ARHGEF1	9138
203057_s_at	0.981528	0.85341	U133ASc1	PR domain containing 2, with ZNF domain	PRDM2	7799
203058_s_at	0.986821	0.893662	U133Asc2	3'-phosphoadenosine 5'-phosphosulfate synthase 2	PAPSS2	9060
203059_s_at	1.02324	0.412306	U133Asc2	3'-phosphoadenosine 5'-phosphosulfate synthase 2	PAPSS2	9060
203060_s_at	1.45292	0.371638	U133Asc2	3'-phosphoadenosine 5'-phosphosulfate synthase 2	PAPSS2	9060
203062_s_at	1.17873	0.25301	U133Asc2	mediator of DNA damage checkpoint 1	MDC1	9656
203064_s_at	0.73466	0.000158359	U133Asc2	forkhead box K2	FOXK2	3607
203065_s_at	1.74283	0.00366918	U133Asc2	caveolin 1, caveolae protein, 22kDa	CAV1	857
203066_at	0.717852	0.0824938	U133Asc2	B cell RAG associated protein	GALNAC4S-6ST	51363
203067_at	0.846115	0.0309322	U133ASc1	pyruvate dehydrogenase complex, component X	PDHX	8050
203068_at	1.16429	0.187381	U133Asc2	kelch-like 21 (Drosophila)	KLHL21	9903
203073_at	0.922622	0.326486	U133Asc2	component of oligomeric golgi complex 2	COG2	22796
203074_at	1.11809	0.150147	U133Asc2	annexin A8 /// annexin A8-like 1 /// similar to Annexin A8 (Annexin VIII) (Vascular anticoagulant-beta) (VAC-beta)	ANXA8 /// ANXA8L1 /// LOC728113	244 /// 653145 /// 728113
203075_at	0.864276	0.0710774	U133Asc2	SMAD family member 2	SMAD2	4087
203076_s_at	0.792855	0.00824095	U133Asc2	SMAD family member 2	SMAD2	4087
203077_s_at	0.880127	0.0853866	U133Asc2	SMAD family member 2	SMAD2	4087
203078_at	0.977458	0.838835	U133Asc2	cullin 2	CUL2	8453
203079_s_at	0.871248	0.0376762	U133Asc2	cullin 2	CUL2	8453
203080_s_at	1.03691	0.724849	U133Asc2	bromodomain adjacent to zinc finger domain, 2B	BAZ2B	29994
203081_at	0.817153	0.0342902	U133Asc2	catenin, beta interacting protein 1	CTNNBIP1	56998
203082_at	0.987083	0.846947	U133Asc2	BMS1 homolog, ribosome assembly protein (yeast)	BMS1	9790
203083_at	0.763321	0.235456	U133Asc2	thrombospondin 2	THBS2	7058
203087_s_at	0.961382	0.808986	U133Asc2	kinesin heavy chain member 2A	KIF2A	3796
203089_s_at	1.16586	0.0113313	U133Asc2	HtrA serine peptidase 2	HTRA2	27429
203092_at	0.936878	0.363223	U133Asc2	translocase of inner mitochondrial membrane 44 homolog (yeast)	TIMM44	10469
203093_s_at	0.88297	0.122622	U133Asc2	translocase of inner mitochondrial membrane 44 homolog (yeast)	TIMM44	10469
203094_at	0.902617	0.140118	U133Asc2	MAD2L1 binding protein	MAD2L1BP	9587
203095_at	0.997175	0.961417	U133Asc2	mitochondrial translational initiation factor 2	MTIF2	4528
203096_s_at	1.29563	0.196756	U133Asc2	Rap guanine nucleotide exchange factor (GEF) 2	RAPGEF2	9693
203097_s_at	1.16457	0.0464082	U133Asc2	Rap guanine nucleotide exchange factor (GEF) 2	RAPGEF2	9693
203098_at	1.03144	0.50468	U133Asc2	chromodomain protein, Y-like	CDYL	9425
203102_s_at	0.588359	0.000627359	U133Asc2	mannosyl (alpha-1,6-)-glycoprotein beta-1,2-N-acetylglucosaminyltransferase	MGAT2	4247
203105_s_at	0.89371	0.305205	U133Asc2	dynamin 1-like	DNM1L	10059
203109_at	0.598794	3.63203e-06	U133Asc2	ubiquitin-conjugating enzyme E2M (UBC12 homolog, yeast)	UBE2M	9040
203112_s_at	0.815243	0.0270526	U133Asc2	Wolf-Hirschhorn syndrome candidate 2	WHSC2	7469
203113_s_at	0.810524	0.000942395	U133ASc1	eukaryotic translation elongation factor 1 delta (guanine nucleotide exchange protein)	EEF1D	1936
203116_s_at	0.868181	0.0274534	U133Asc2	ferrochelatase (protoporphyria)	FECH	2235
203117_s_at	1.04779	0.549842	U133Asc2	ubiquitin specific peptidase 52	USP52	9924
203119_at	0.872198	0.0666137	U133Asc2	coiled-coil domain containing 86	CCDC86	79080
203120_at	0.879713	0.00449343	U133Asc2	tumor protein p53 binding protein, 2	TP53BP2	7159
203123_s_at	0.877943	0.213226	U133Asc2	solute carrier family 11 (proton-coupled divalent metal ion transporters), member 2	SLC11A2	4891
203124_s_at	1.11824	0.358502	U133Asc2	solute carrier family 11 (proton-coupled divalent metal ion transporters), member 2	SLC11A2	4891
203126_at	0.851307	0.0813931	U133ASc1	inositol(myo)-1(or 4)-monophosphatase 2	IMPA2	3613
203131_at	1.05348	0.695958	U133Asc2	platelet-derived growth factor receptor, alpha polypeptide	PDGFRA	5156
203132_at	1.07979	0.621891	U133Asc2	retinoblastoma 1 (including osteosarcoma)	RB1	5925
203133_at	1.02096	0.747734	U133Asc2	Sec61 beta subunit	SEC61B	10952
203135_at	0.962009	0.249553	U133Asc2	TATA box binding protein	TBP	6908
203136_at	0.638741	0.000151851	U133Asc2	Rab acceptor 1 (prenylated)	RABAC1	10567
203137_at	0.655227	1.16765e-06	U133Asc2	Wilms tumor 1 associated protein	WTAP	9589
203138_at	0.981946	0.822699	U133Asc2	histone acetyltransferase 1	HAT1	8520
203139_at	1.27958	0.16237	U133Asc2	death-associated protein kinase 1	DAPK1	1612
203140_at	1.43377	0.00169658	U133ASc1	B-cell CLL/lymphoma 6 (zinc finger protein 51)	BCL6	604
203142_s_at	0.868061	0.0925416	U133Asc2	adaptor-related protein complex 3, beta 1 subunit	AP3B1	8546
203149_at	1.01563	0.82816	U133Asc2	poliovirus receptor-related 2 (herpesvirus entry mediator B)	PVRL2	5819
203151_at	0.880433	0.127763	U133Asc2	microtubule-associated protein 1A	MAP1A	4130
203152_at	1.02413	0.595604	U133Asc2	mitochondrial ribosomal protein L40	MRPL40	64976
203153_at	1.32898	0.0268313	U133Asc2	interferon-induced protein with tetratricopeptide repeats 1	IFIT1	3434
203155_at	1.14382	0.0101964	U133Asc2	SET domain, bifurcated 1	SETDB1	9869
203156_at	0.946337	0.518525	U133Asc2	A kinase (PRKA) anchor protein 11	AKAP11	11215
203159_at	1.03623	0.618224	U133Asc2	glutaminase	GLS	2744
203160_s_at	1.12677	0.214313	U133Asc2	ring finger protein 8	RNF8	9025
203162_s_at	0.844374	0.0235392	U133Asc2	katanin p80 (WD repeat containing) subunit B 1	KATNB1	10300
203164_at	0.743954	0.0339051	U133Asc2	solute carrier family 33 (acetyl-CoA transporter), member 1	SLC33A1	9197
203166_at	1.0725	0.185593	U133Asc2	craniofacial development protein 1	CFDP1	10428
[truncated: 15,282 more rows]
